# Supplementary material for: A tRNA modification in Mycobacterium tuberculosis facilitates optimal intracellular growth
Source: eLife. 2023 Sep 27;12:RP87146. doi: 10.7554/eLife.87146 (PMC10531406; doi:10.7554/eLife.87146)
Supplement: Figure 1—source data 1. [file elife-87146-fig1-data1.xlsx]

## Sheet: Fig. 1
	MiaA	MiaB	MnmA	TsaB	TsaD	TsaE	Sua5	TruA	TruB	TadA	DusB	TilS	Trm2	TrmB	TrmD	TrmH1	TrmH2	TrmL	TrmI	RluA	Pus9	TrmR	TrcM
Legionella_pneumophila	-39.1057	-95.5935	-59.4145	-13.475	-59.9788	-4.16368	-20.8416	-39.6904	-45.2815	-27.2676	-25.295	-14.0031	-10.0057	-37	-48.0926	-8.66154	0.0791812	-42.7986	0.255273	-46.4461	-8.71444	-21.8729	-25.5346
Francisella_tularensis	-40.2967	-99.3655	-60.7696	-5.83565	-68.5513	-9.34582	-2.39794	-39.0146	-52.4559	-26.1656	-57.15	-16.8356	-5.88273	0	-49.5467	-18.9872	0	-37.4868	0	-44.8069	-6.6925	-13.9355	-16.0773
Aeromonas_hydrophila	-42.3279	-109.542	-50.0292	-13.8268	-71.0353	-9.87615	-3.58838	-36.0264	-48.9208	-32.9666	-53.0731	-11.5045	-27.8327	-43.8665	-50.567	-19.279	-5.33348	-45.4921	0	-46.5817	-15.1765	-13.5935	-33.5607
Haemophilus_influenzae	-43.1163	-105.421	-47.1273	-10.0768	-76.9469	-6.82102	-8.44612	-26.821	-50.7167	-36.7905	-48.4935	-18.0655	-10.3536	-34.7696	-47.1649	-7.9431	0	-47.9318	0	-39.6882	-17.3401	0	-29.7986
Xanthomonas_oryzae	-41.2716	-96.1249	-57.3335	-8.18776	-73.5406	-8.52288	-7.67572	-27.9431	-38.9508	-32.8297	-15.5143	-12.8125	-5.42251	-41.5391	-46.1302	-10.6536	0	-48.1124	0.146128	-47.9431	-51.0799	0.929419	-21.7852
Vibrio_cholerae	-41.3915	-99.2472	-48.1561	-11.8827	0	-7.90309	-27.0223	-36.9281	-46.5157	-30.1221	-45.8697	-18.7721	-17.2741	-37.8416	-44.1284	-12.4962	-3.4908	-48.4634	0.255273	-46.0942	-14.6421	0	-30.1864
Vibrio_parahaemolyticus	-40.8153	-96.5817	-46.7423	-15.8477	-76.2336	-11.4921	-11.6478	-37.3487	-48.2343	-29.4377	-47.104	-15.3089	-13.9547	-39.3862	-46.6882	-16.4724	-4.06048	-50.3757	0.69897	-43.5243	-14.4802	0.146128	-33.5376
Acinetobacter_baumannii	-41.9508	-98.1073	-42.3382	-5.84771	-71.6478	-10.8729	-12.055	-23.1746	-52.2248	-27.1261	-48.6716	-21.384	-22.9508	-25.6459	-43.3261	-13.9666	-0.356547	-33.4486	0.886491	-38.7167	-55.2652	-47.7721	-21.3288
Pseudomonas_syringae	-46.6676	-108.309	-55.4101	-12.9066	-74.153	-9.65365	-11.2526	-35.6596	-45.8665	-32.8125	-51.684	-22.7258	-7.35754	-36.6737	-49.7595	-12.2233	-2	-52.9957	0.556303	-44.4868	-60.4425	-0.236572	-29.3851
Pseudomonas_aeruginosa	-39.3251	-108.344	-56.7328	-9.25181	-76.2132	-8.92812	-12.8356	-34.6234	-45.2933	-34.065	-54.8153	-23.7595	-15.2457	-37.6003	-48.0301	-10.5143	-0.481486	-50.51	-0.0315171	-46.8794	-58.1726	-25.2924	-34.1805
Idiomarina_loihiensis	-53.5346	-97.5436	-56.5834	-14.1024	-75.466	-9.79317	-10.0501	-34.0883	-37.7305	-34.7399	-49.4935	-17.2358	-6.3536	-44.8477	-47.6198	-10.3316	-11.1421	-48.4881	0.342423	-47.0883	-14.8153	0.60206	-31.0448
Shewanella_oneidensis	-40.5452	-104.156	-50.5302	-11.7212	-73.1273	-8.04769	-7.42713	-35.0496	-45.0575	-5.16052	-47.8928	-13.9872	-20.9788	-37.058	-51.8386	-8.1343	-0.408935	-47.762	0	-37.0685	-51.7959	0	-32.3116
Yersinia_pestis	-42.0301	-104.785	-53.3915	-12.0114	-77.0501	-9.83863	-12.0545	-31.1379	-48.5031	-30.5017	-52.8182	-17.1811	-12.9508	-38.767	-45.2328	-17.3925	-8.61798	-47.0721	0	-39.6635	-16.6234	-0.0757207	-39.1343
Yersinia_pseudotuberculosis	-42.0301	-104.577	-53.3915	-12.0292	-76.8297	-9.39577	-12.0545	-31.1864	-48.5031	-30.7595	-52.8182	-17.1113	-12.4498	-38.9208	-45.2328	-17.3925	-8.61439	-47.0721	0	-39.8894	-16.6234	-0.0757207	-39.1343
Klebsiella_pneumoniae	-44.71	-105.039	-49.4318	-12.5243	-76.6271	-10.5287	-15.684	-36.6289	-49.7122	-32.767	-38.8729	-9.767	-12	-40.5834	-47.2197	-12.7645	-10.3716	-47.4237	0	-37.7352	-13.9469	-60.9318	-39.2684
Salmonella_enterica	-45.4685	-106.539	-48.5331	-10.9914	-77.2565	-9.66354	-11.8633	-37.6757	-52.9788	-30.7959	-46.2565	-10.5528	-9.55129	-40.3224	-47.7905	-14.1925	-9.16304	-47.6271	0	-38.4672	-16.1209	0	-38.5544
Escherichia_coli	-45.0942	-107.338	-49.767	-9.5817	-75.3125	-9.73755	-11.7212	-37.3429	-50.6091	-32.6308	-45.7986	-9.20971	-9.32239	-37.1163	-47.7959	-14.451	-11.068	-47.8327	0	-40.9547	-13.8962	0	-35.2588
Shigella_flexneri	-45.3904	-107.281	-49.5421	-9.90309	-75.5186	-9.73755	-12.068	-36.7305	-50.4789	-32.4976	-35.6904	-9.79317	-9.58503	-37.1163	-47.7959	-14.451	-11.068	-47.3526	0	-41.0325	-13.8729	0	-34.4377
Gluconacetobacter_diazotrophicus	-34.8508	-77.9788	-70.9747	-0.259637	-63.7852	-6.41908	-26.5361	-18.3696	-54.2832	-29.4001	-64.1733	-2.39794	-13.0287	-19.9586	-58.3134	-4.29843	0	-4.16431	0	-49.9747	-15.2457	0.623249	-23.5331
Maricaulis_maris	-27.3363	-99.2291	-70.2676	-4.69037	-65.6421	-11.2388	-25.1605	-31.983	-46.8447	-25.1739	-33.6459	-8.37779	0.361728	-17.8827	-52.8013	-10.0804	-1.45593	-19.585	-0.283997	-44.8041	-16.2418	-20.757	-23.0565
Ehrlichia_canis	-22.6676	-95.163	-63.7721	-3.50585	-63.0516	-3.78252	-23.6946	-32.7773	-43.0665	-20.6819	-49.8894	-11.2464	0	0	-65.8153	-3.06803	0	0	0	-39.2534	-9.42597	-16.5376	0
Rickettsia_canadensis	-33.8601	-91.341	-73.4881	-5.28233	-65.1844	-7.95861	-27.5157	-35.1831	-33.1367	-19.3747	-58.9547	-3.31515	0	0	-52.1918	-7.13847	0	0.845098	0	-46.6904	-11.5114	0	0
Rickettsia_rickettsii	-33.6861	-90.2426	-75.3788	-4.7167	-64.4078	-8.29585	-27.7328	-33.5575	-33.9547	-20.1391	-62.2612	-4.10679	0	-14.4949	-46.0555	-10.1296	0	0	0	-46.5719	-10.8665	0	0
Mesorhizobium_loti	-32.2111	-92.0555	-72.6364	-9.62893	-66.5031	-10.4145	-15.8416	-43.1844	-39.27	-22.4401	-40.8386	-11.9508	-10.0339	-10.4306	-52.3925	-20.3979	-4.52871	-22	-1.05061	-47.1255	-8.31966	-0.346787	-22.7852
Brucella_ovis	-30.6676	-100.243	-67.7423	-12.3335	-76.7773	-7.77728	-18.8069	-39.8729	-47.4123	-21.9355	-39.1838	-1.95861	-8.87943	-12.3526	-52.8633	-19.5986	-0.69897	-20.2725	0.0791812	-50.1952	-11	-1	-29.6459
Brucella_melitensis	-29.1249	-99.5376	-67.1746	-12.3468	-77.3788	-7.83863	-18.5686	-39.8729	-46.9666	-21.9355	-38.6038	-1.82391	-8.73755	-12.3526	-52.8633	-18.6882	-1.20761	-20.2725	-0.0457575	-50.4413	-11.2336	-1	-28.9031
Agrobacterium_tumefaciens	-37.8601	-98.7932	-66.5421	-13.1267	-64.8239	-10.7399	-18.2027	-39.0726	-41.1844	-24.4295	-39.2388	-4.57349	-5.21396	-10.9031	-49.8447	-28.0246	-1.60206	-23.8477	0	-43.8894	-15.3363	0	-21.3242
Rhizobium_leguminosarum	-32.2104	-95.5058	-68.8297	-13.9318	-67.0585	-12.1035	-16.1726	-41.2807	-41.214	-25.6536	-48.0195	-7.37366	-13.2612	-10.3788	-49.3726	-25.9318	0.0413927	-23.9666	0.799341	-45.1325	-9.59346	-14.9508	-24.248
Neisseria_gonorrhoeae	-41.8827	-105.762	-49.9788	-7.39254	-64.2815	-5.86646	-4.21753	-24.983	-38.0742	-29.4248	-51.1046	-15.1141	-2.30103	-35.1549	-52.6021	-17.8386	-3.36957	-48.8447	0	-49.7447	-59.4145	-19.0904	-23.9393
Neisseria_meningitidis	-41.8539	-105.445	-45.0424	-8.61798	-65.7011	-5.13549	-4.76955	-24.1073	-41.8268	-29.5229	-53.3188	-16.8894	-3.9431	-36.4724	-51.8729	-14.0685	-3.46471	-50.5436	0	-50.2403	-60.8477	-19.1811	-24.3947
Nitrosomonas_eutropha	-44.6253	-97.8633	-58.5607	-10.5952	-74.4271	-7.14026	-29.2457	-30.4342	-40.9914	-34.0737	-54.1898	-13.2815	0	-47.2636	-48.1481	-19.2069	-3	-42.7799	-0.585027	-52.0645	-10.2716	-11.2636	-28.5591
Bordetella_bronchiseptica	-49.6536	-109.519	-43.433	-5.40012	-62.7212	-3.12263	-31.2027	-28.0381	-42.6536	-32.6655	-53.5331	-11.9172	-14.9136	-47.4881	-51.4868	-14.1226	0.230449	-49.4634	0.431364	-34.2321	-10.2373	0	-28.9031
Verminephrobacter_eiseniae	-44.3298	-95.6615	-47.9706	-7.23433	-68.1904	-5.57349	-25.0218	-27.308	-39.0867	-27.6108	-45.2013	-14.4895	-0.537602	-38.2426	-49.6904	-11.4881	-1.24413	-43.6615	0	-40.1599	-61.4067	-2.39794	-27.9957
Burkholderia_mallei	-44.0937	-106.873	-52.9393	-5.42829	-68.752	-2	-35.4868	-28.9355	-46.3788	-31.8996	-51.2396	-14.2692	-10.4962	-39.0762	-44.7496	-18.6326	-0.408935	-45.6021	-0.200659	-46.0768	-9.86967	-59.054	-32.5607
Burkholderia_cenocepacia	-38.5361	-105.947	-44.9914	-8.13312	-68.5654	-1.65758	-28.5214	-33.71	-50.8477	-34.3072	-53.2182	-10.9586	-11.158	-43.1141	-46.0334	-19.5258	-1.85387	-43.8297	-0.537602	-42.6737	-10.3143	-55.0074	-27.7258
Syntrophobacter_fumaroxidans	-44.752	-108.485	-64.3737	-10.2062	-71.0146	-12.7212	-17.4535	-31.585	-42.7033	-35.0168	-43.1079	-11.1965	-12.6536	0	-58.6021	-5.95078	0.278754	-25.3288	-48.0645	-52.1669	-16.4306	-9.38091	-50.2684
Myxococcus_xanthus	-41.5031	-97.9136	-73.699	-5.13312	-88.9245	-10.8827	-30.0132	-26.8794	-53.284	-37.8097	-54.2083	-13.061	-16.8447	-18.0146	-52.2798	-13.7986	-2.69897	-31.8827	-1.61979	-49.1778	-21.0438	-26.0381	-45.9172
Desulfovibrio_desulfuricans	-42.1209	-90.3947	-37.3904	0	-61.6676	-6.98297	-10.1662	-29.3449	-34.1029	-18.5607	-38.5952	-11.6364	-6.24033	0	-54.3925	-8.29585	-3.16115	-22.4828	-30.4089	-37.2708	-9.44491	-11.3726	-14.1481
Nautilia_profundicola	-25.0757	-93.2725	-55.5986	0	-57.752	-4.90309	0	-16.5751	-27.0035	0	-36.4634	-8.12726	-2.04576	-6.71444	-42.5287	-5.95468	-2.69897	-32.8962	0	-41.0867	-9.10902	0	-12.5346
Helicobacter_pylori	-23.9914	-90.3915	-52.4949	0	-39.1662	-3.45717	0	-9.67366	0	0	-21.9872	-5.56864	0	-7.07727	-29.2426	-11.2604	0.544068	0	0	-27.8633	-13.52	0	0
Campylobacter_jejuni	-12.2549	-85.1373	-60.6402	-0.30103	-49.2765	0.544068	0	-16.821	-26.011	0	-43.7747	-8.39041	-2.09691	-4.11634	-48.0237	-8.80967	0	-22.9431	0	-26.1824	-12.7305	0	-14.9547
Bdellovibrio_bacteriovorus	-35.1192	-100.833	-56.7375	-6.35556	-70.3615	-4.55284	-16.8508	-24.8386	-37.9957	-31.9586	-56.0395	-8.29414	-24.7447	-2.69897	-53.9355	-9.91009	-4.09637	-32.1662	-0.769551	-43.1759	-9.77469	-18.1593	-16.4895
Acidithiobacillus_ferrooxidans	-31.5498	-102.68	-67.8827	-13.0511	-67.6757	-6.98297	-30.4449	-34.9586	-50.1518	-33.8794	-13.8665	-17.5935	-17.0768	-23.6144	-46.7352	-13.8861	0	-45.6162	-1.85387	-41.1778	-11.1605	-0.769551	-21.6364
Finegoldia_magna	-55.8386	-128.362	-63.6536	-10.2526	-85.301	-14.2899	-25.7352	-28.585	-32.219	-31.8633	-57.5702	-19.3904	-22.2403	-0.366532	-54.7447	-23.4134	-2.39794	-27.7258	-0.853872	-36.5302	-12.9318	-15.2434	-25.064
Moorella_thermoacetica	-58.5952	-124.967	-80.9547	-15.1898	-78.7645	-16.9136	-32.9957	-27.7905	-48.5186	-34.7721	-57.8539	-22.8962	-12.1759	0	-61.0155	-23.0218	-0.677781	-33.1624	-4.69037	-45.2373	-7.6968	-0.619789	-58.4225
Clostridium_botulinum	-55.4306	-136.604	-78.8633	-5.6073	-79.7645	-17.1662	-33.9066	-35.2321	-40.9031	-26.2464	-65.3516	-19.0615	-16.4698	-3.80688	-56.5287	-33.0306	-4.67778	-32.9208	0	-58.6021	-9.78516	-14.6757	-51.1302
Listeria_monocytogenes	-55.8297	-0.468521	-63.7986	-9.88941	-73.0453	-17.5171	-30.5513	-34.8861	-42.585	-30.9431	-50.4389	-16.9626	-10.7595	-17.2993	-62.1681	-32.6655	-1.4437	-27.7545	0	-51.3788	-14.9031	-12.4112	-45.6478
Staphylococcus_aureus	-51.0899	-117.51	0	-12.6073	-76.9547	-15.5436	-25.2358	-28.5884	-37.8601	-36.7011	-19.1785	-9.06854	-10.5986	-15.9136	-62.8633	-31.433	0.322219	-27.4134	-0.823909	-40.8729	-10.5686	-7.451	-40.1349
Geobacillus_thermodenitrificans	-64.0496	-124.368	-62.9355	-9.88941	-71.5607	-14.2676	-33.9208	-34.0867	-44.1805	-37.6925	-65.295	-18.2306	-19.5918	-18.1273	-62.2565	-28.8153	-5.69897	-24.6904	0	-44.1858	-8.34775	-8.73518	-53.2048
Bacillus_subtilis	-58.7852	-122.268	-62.1487	-11.0501	-77.3737	-10.8013	-34.6402	-36.0329	-46.8097	-38.3401	-64.3726	-21.3757	-16.5935	-15.9136	-61.6091	-32.6253	-1.58503	-29.1169	0	-47.4962	-10.5287	-9.04479	-53.9031
Lactococcus_lactis	-40.9101	-0.508638	-59.1113	-7.66154	-68.9666	-14.762	-22.7747	-26.0878	-45.9957	-33.2262	-58.9393	-3.46344	-12.7932	-18.3298	-67.1778	-32.9245	-2.39794	-29.5751	0	-45.3487	-12.8013	-14.5735	-40.4342
Streptococcus_pneumoniae	-43.0353	0	-51.4572	-12.2534	-77.6556	-16.5544	-23.9747	-22.4134	-47.6737	-35.7878	-49.7773	-5.41005	-15.5058	-16.4056	-66.27	-26.2526	-1.76955	-25.9666	0	-48.5467	-12.2161	-11.1537	-42.5622
Lactobacillus_acidophilus	-46.8962	0	-55.7496	-14.6778	-68.3224	-8.39041	-30.0857	-32.2518	-46.7375	-28.7122	-53.752	-4.98716	-22.1046	-13.3206	0	-26.1124	-0.552842	-24.7423	-0.130768	-45.0737	-11.5129	0	-32.466
Acidimicrobium_ferrooxidans	-20.4112	-120.421	-53.7932	0	-58.109	-9.89963	-15.3449	-21.9914	-55.5901	-27.3298	0	-17.8861	0	0	-46.2204	-16.0501	-1	0	-45.6126	-43.1561	-3.9431	-3.79317	-0.337242
Cryptobacterium_curtum	-52.062	-118.967	-59.3215	-11.9508	-71.8125	-9.23657	-24.752	-29.6676	-49.2351	-29.9747	-50.4935	-2.52288	-15.6478	0	-63.3915	-12.983	0.568202	-0.677781	0	-38.6345	-3.71897	0	-15.2652
Acidothermus_cellulolyticus	-89.3063	-136.604	-139.159	-30.7258	-120.69	-28.3391	-73.0088	-69.2321	-76.0339	-51.7235	0	-30.6757	-61.1018	0	-90.0585	-9.30103	-0.958607	-59.6615	-93.6498	-121.407	-9.44733	-14.9508	-103.553
Frankia_alni	-84.3335	-136.604	-117.824	-34.1925	-115.804	-20.8996	-78.6968	-89.6253	-85.7595	-39.384	0	-28.4572	-27.7986	0	-82.7144	-51.2403	-4.41567	0	-105.951	-125.614	-4.70774	-68.3279	-113.456
Bifidobacterium_adolescentis	-69.0348	-136.604	0	-13.0926	-90.6904	-24.4191	-20.6162	-61.2161	-60.2161	-35.6556	-117.623	0	-34.0123	-20.0052	-71.1986	-24.2596	-47.4547	-53.0926	-76.4134	-83.9136	-58.8508	0	0
Streptomyces_coelicolor	-96.857	-136.604	-124.243	-34.9957	-128.28	-28.8729	-74.4461	-76.2782	-84.0159	-48.5702	-140.428	-45.0726	-67.426	-42.1487	-80.6003	-57.9172	-5.15304	-2.09691	-103.561	-132.292	-78.5498	-63.618	-126.321
Brachybacterium_faecium	-88.8827	-136.604	-104.074	-14.9101	-110.439	-13.1255	-56.0083	0	-75.5935	-35.1701	-135.51	-45.585	-63.8268	-28.8928	-76.5436	-35.4737	-67.6144	-55.7721	-101.21	-120.041	-56.6498	-8.11126	-109.33
Rhodococcus_jostii	-137.728	-136.604	-178.037	-64.3401	-164.943	-34.1146	-99.9586	-112.449	-107.975	-67.4976	-178.371	-74.3947	-113.112	-75.0878	-114.334	-86.6003	-96.8697	-79.0182	-137.417	-174.074	-88.4815	-21.8861	-176.807
Mycobacterium_tuberculosis	-151.163	-136.604	-178.037	-145.772	-164.943	-116.155	-153.833	-141.772	-137.565	-101.387	-178.371	-140.785	-148.353	-96.3382	-166.78	-179.886	-130.262	-109.955	-153.74	-174.074	-129.171	-154.73	-176.807
Mycolicibacterium_smegmatis	-151.163	-136.604	-178.037	-84.4401	-164.943	-56.4634	-114.674	-141.772	-134.496	-81.821	-178.371	-140.785	-148.353	-96.3382	-133.381	-110.542	-107.777	-84.2373	-148.548	-174.074	-129.171	-85.6345	-176.807
Mycobacteroides_abscessus	-134.674	-136.604	-178.037	-71.8447	-164.943	-63.9066	-99	-127.396	-137.565	-75.0022	-178.371	-103.143	-148.353	-82.7799	-123.714	-93.5575	-102.465	-71.6925	-153.74	-168.951	-106.136	-68.9136	-176.807
Corynebacterium_diphtheriae	-112.014	-136.604	-142.413	-55.0074	-137.469	-37.0762	-94.5735	-91.6162	-102.936	-47.6345	-178.371	-53.8633	-84.6882	-51.3233	-94.7144	-79.3261	-92.4908	-58.0635	-109.66	-144.237	-58.6615	-4.3098	-156.65
Mesoplasma_florum	0	0	-51.4976	0	-67.4962	-7.92445	-2.52288	-20.5751	-38.8356	-8.13371	-61.3862	-4.2233	0	-13.2366	-47.7799	-28.3575	0.322219	-16.9747	0	-47.1694	-9.44249	0	0
Mycoplasma_gallisepticum	-15.9393	0	-40.1759	-0.886057	-49.2457	0	-10.4365	-21.6498	-28.5436	0	0	0	0	-3	-35.9469	-15.7696	0	-19.7305	0	-28.9245	-8.75203	0	0
Mycoplasma_capricolum	0	0	-49.2299	0.230449	-60.3655	-7.16304	-3	-10.0575	-39.5467	-11.1319	-58.1925	0	0	-14.1255	-47.451	-22.0325	-1.20761	-15.3344	0	-56.3872	-13.8182	-1.4318	-33.3197
Nostoc_punctiforme	-51.1029	-103.406	-63.8097	-4.57349	-69.4123	-12.8416	-10.5735	-30.2907	-54.5638	-31.0857	-57.7282	-17.0061	-14.4112	-8.68613	-53.9208	-32.4461	-0.920819	-30.1911	-0.721246	-45.5171	-10.3002	-25.6968	-46.5735
Roseiflexus_castenholzii	-46.8996	-56.8327	-78.4776	-5.57675	-66.5638	-14.983	-32.5406	-32.6271	-52.2449	-3.8962	-47.5243	-17.1433	-18.5171	0	-48.0287	-23.3947	-5.09151	-4.11748	0	-50.6345	-15.0575	-61.9031	0
Chloroflexus_aurantiacus	-42.3893	-82.757	-70.2118	-6.57187	-61.3696	-18.5768	-29.5287	-37.0079	-65.0757	0	-51.5702	-20.8327	-14.8794	-10.8729	-47	-21.209	-4.96658	-6.50031	0	-52.1057	-15.5817	-12.0315	-2.52288
Thermus_thermophilus	-42.0146	-95.1057	-76.9626	-6.12033	-74.4634	-8.78781	-17.3401	-27.3298	-49.2048	-12.9066	-16.4437	-13.2832	-11.6498	-20.9547	-57.6882	-26.0565	-4.36754	-33.7747	-41.0292	-35.7471	-12.0066	0.361728	-21.1232
Deinococcus_radiodurans	-35.9469	-81.9914	-65.7959	-7.88941	0	-11.6517	-3.53462	-40.3036	-44.6091	-16.5986	-34.3487	-12.0241	0	-8.05306	-62.3536	-20.9469	-1.5376	-24.9245	0	-29.2321	-17.6091	-5.51145	-22.8013
Gemmatimonas_aurantiaca	-28.341	-92.6635	-57.054	-4.50724	-64.8729	0	-28.4498	-20.767	-44.6799	-36.1733	-55.0168	-9.84164	-2.69897	0	-57.6144	-19.9788	-1.284	-22.0531	0.60206	-45.1209	-8.54668	-2.04576	-38.4908
Chlorobium_phaeovibrioides	-36.7212	-86.4248	-62.2027	-3.52433	-64.4377	-7.71444	-21.3019	-29.9172	-31.1255	-34.8153	-52.1838	-6.52143	-11.4306	0	-47.3862	-15.0752	-6.22548	-3.48149	0	-33.4202	-4.47366	0	-36.983
Chitinophaga_pinensis	-35.5317	-88.2062	-57.289	-7.66154	-64.2495	-6.92445	-7.6968	-21.618	-44.1278	-16.4365	-44.058	-8.20901	-10.7235	-10.2104	-50.3507	-18.3575	-7.13966	-3.18709	0	-38.0635	-12.983	-15.3645	-13.0097
Bacteroides_fragilis	-36.2396	-89.6861	-49.2976	-6.71444	-61.0443	-5.85387	-7.15677	-30.6946	-52.7122	-26.067	-50.2321	-10.8153	-11.0846	-6.91721	-51.7852	-16.7033	-4.92812	-3.15552	0	-33.4401	-8.31876	-19.1605	-11.5952
Bacteroides_thetaiotaomicron	-36.3893	-90.0696	-48.9666	-6.10018	-59.6696	-5.25493	-7.85699	-30.4672	-51.684	-25.0721	-44.6968	-11.8069	-12.0424	-8.05799	-50.8097	-15.6326	-3.13549	-3	0	-34.6925	-9.3536	-20.5143	-9.4045
Flavobacterium_psychrophilum	-39.0205	-82.8601	-53.2725	-9.74473	-54.1543	-9.21325	-10.1361	-31.2823	-40.6126	-24.0287	-42.0448	-11.7055	-13.3161	-8.58503	-54.8996	-18.762	-7.30627	-23.9318	0	-38.4522	-9.25181	-17.8477	-21.1864
Treponema_pallidum	-19.6216	-91.9245	0	-1.92082	-62.6778	-13.8182	-7.92445	-26.4881	-28.8928	0	-45.1255	-14.9914	0	-34.3372	-53.6716	-7.16877	-1.12494	0	0	-25.8182	-15.1051	0	0
Petrotoga_mobilis	-37.5654	-98.4067	-54.6271	-3	-75.057	-9.27246	-26.5498	-26.0241	-45	0	-35.6757	-9.13906	-21.8356	-12.0931	-57.0278	-12.0665	-0.920819	-1.49485	0	-42.1221	-7.03339	0	0
Thermotoga_maritima	-39.4318	-91.0214	-59.2684	-0.920819	-82.3883	-14.7799	-31.2916	-33.7375	-38.6737	-2.22185	-36.4572	-9.21183	-19.4672	-15.6364	-56.3036	-13.2798	0	0	-32.2168	-54.1494	-13.4711	-5.011	-31.2125
Chlamydia_trachomatis	-48.8761	0	-52.3575	0	-56.6716	-8.00568	-17.2062	-37.4353	-38.5817	-27.4413	-36.8861	-11.5243	-7.12843	-11.3893	-53.8827	-17.3883	0.643453	-26.2403	0	-31.7721	-16.9914	0	-12.5467
Methylacidiphilum_infernorum	-19.4168	-96.0106	-72.2487	-7.06449	-63.9172	-10.6498	-26.4698	-39.5622	-54.5686	-20.1952	0	-10.2495	-9.11407	-17.5171	-61.0241	-1.16115	0	-24.7282	-2.52288	-35.2865	-14.2628	-22.644	0
Aquifex_aeolicus	-44.8508	-122.363	-66.2154	0	-70.0159	-10.719	-15.9666	-23.7399	-49.4123	-26.1938	-45.2343	-14.1163	-21.719	-12.556	-39.6968	-12.9393	-3.13136	-1.34679	-24.983	-47.2248	-10.1007	-28.8447	0
Sulfurihydrogenibium_azorense	-48.0195	-118.883	-55.1543	-1.58503	-66.2013	-7.21042	-23.466	-22.9318	-45.1675	-18.5482	0	-15.58	-23.6003	-1	-59.5528	-11.6904	-4.27654	-0.173925	-29.8386	-42.5331	-10.2411	-7.73518	0
Acidobacterium_capsulatum	-35.9547	-90.9281	-70.6615	-8.09637	-64.2588	-10.6383	-19.3526	-28.8633	-46.1599	-33.3372	-54.062	-13.7258	-28.9626	0	-51.1791	-25.5129	-3	-1.69897	0.39794	-40.214	-13.4473	-64.1238	-35.0097
Fusobacterium_nucleatum	-38.7447	-109.224	-59.0825	-9.5376	-81.58	-1.16749	-24.7878	-25.9547	-38.5817	-1.95861	-45.6478	-11.0241	-22.4306	-6.9393	-53.821	-20.9586	-2	-33.0878	0	-39.3116	-10.6073	-7.41908	-38.7545
Dictyoglomus_thermophilum	-56.762	-108.167	-67.5317	-2.09691	-77.5171	-19.6517	-30.4868	-31.6517	-36.1451	-21.0747	0	-16.007	-10.0747	-17.5528	-65.6021	-30.1124	0	-28.6073	-74.2604	-47.7144	-11.3665	0.477121	-32.2765
Coprothermobacter_proteolyticus	-35.6635	-92.8761	-63.3288	-3.09098	-49.8477	-12.6716	-32.4724	-22.1972	-22.3936	-30.1568	0	-11.4535	-23.426	-10.2941	-40.2823	-9.05552	0	0	-0.408935	-43.71	-5.88273	0	0
Thermodesulfovibrio_yellowstonii	-39.0531	-103.53	-46.9914	-7.9914	-71.8729	-8.18842	-12.9666	-32.1296	-44.5884	-39.8097	0	-21.6459	-33.8928	-7.35164	-59.4921	-36.0904	-1.74473	0.414973	-59.9586	-47.5086	-8.22695	-0.886057	-30.0565
Elusimicrobium_minutum	-33.6615	-67.4597	-65.475	-1.02228	-67.1945	-11.9136	-10.4248	0	-42.5302	-10.0306	-39.3036	-16.3354	-13.9393	0	-57.0209	-5.35458	-0.886057	-21.9747	0	-26.8356	-12.2874	0	0
Encephalitozoon_cuniculi	0	0	0	0	-16.7399	0.113943	-23.2013	-16.301	-17.5031	-4.58004	-25.1314	0	-0.29243	-3.80688	0	0	0	0	-0.366532	-8.2652	-7.55909	0	-16.1226
Schizosaccharomyces_pombe	-34.5638	0	-22.3449	0	-29.5607	-0.337242	-18.6655	-17.0339	-17.5436	-7.69465	-17.7375	-1.49485	-13.4737	-3.98716	0	-3	0	0	-12.3344	-7.67572	-20.3788	-5.98297	-17.767
Candida_albicans	-37.4685	0	-34.6819	0	-22.1561	0.968483	-18.4045	-15.3335	-21.0137	-6.4045	-22.6308	-5.69037	-12.3344	-2.39794	0	-1.03621	-3.15428	0	-19.3605	-15.0141	-16.3063	-5.78516	-15.7471
Saccharomyces_cerevisiae	-33.9508	0	-33.0585	0	-29.1694	0.892095	-17.3179	-15.1158	-20.9626	-6.74958	-17.3737	0	-11.0872	-3.62525	0	-1.02687	-3.11014	0	-9.04479	-13.4634	-18.9031	0	-14.8996
Trichoderma_reesei	-31.2161	0	0	0	-17.5784	0.995635	-22.7423	-4.08302	-20.9872	-2.52288	-12.7235	-3.35655	-8.46092	-4.33068	0	-5.4168	-0.769551	0.913814	-6.59346	-7.41117	-11.5719	-17.3788	-18.6162
Aspergillus_oryzae	-18.4012	0	0	0	-18.1073	0	-16.9031	0.838849	-22.1421	-10.5686	-15.1918	0.361728	-8.53611	-3.45717	0	-2.22185	0	0.491362	-6.28988	-11.0635	-8.86967	-39.8894	-15.4698
Paracoccidioides_brasiliensis	-20.6778	0	0	0	-19.6421	0	-15.9136	-5.88273	-23.1445	-8.65561	-17.6799	-3	-7.8729	-3	0	-4.25727	0	0	-11.0159	-4.25885	-10.5045	-15.8416	-18.8239
Caenorhabditis_elegans	-22.9245	-66.4584	-41.6536	-0.251812	-29.1273	0.913814	-10.1979	-10.0491	-17.1221	-15.1101	-22.2823	0	-3	-1.4318	0	0	-4.14448	0.991226	-9.50169	-14.2041	-13.4449	-9.60555	-13.0991
Drosophila_melanogaster	-33.1373	-81.6882	-36.9508	0	-33.1198	0.763428	-11.7471	-11.7905	-18.9101	-6.76447	-28.6253	0	-5.85699	-0.0315171	0	-16.7825	-2.69897	0.986772	-17.2269	-10.4225	-17.7959	0.342423	-15.1952
Xenopus_tropicalis	-32.2526	-86.4067	-43.2161	0	-39.1463	0	-15.6498	-16.9172	-31.0362	-9.04964	-30.0155	0	-8.007	-1.76955	0.90309	-12.6055	-3.34104	0	-35.1002	-14.6383	-16.752	-12.2284	-18.556
Mus_musculus	-32.757	-83.6289	-41.5528	0	-37.8827	-0.327902	-15.5272	-17.0381	-29.9788	-8.78781	-29.3883	0	-6.39903	-4.73283	0	-16.1451	-3.15181	0	-14.3575	-16.3354	-18.2534	-14.71	-17.6198
Homo_sapiens	-32.2899	-85.7932	-41.1129	0.462398	-34.1192	0	-11	-16.9431	-29.6757	-7.87615	-31.0405	0	-5.20761	-2.39794	0	-13.4962	-3.1349	0.826075	-29.7375	-16.8327	-18.7878	-14.2	-18.9101
Oryza_sativa	-37.2472	-72.1707	-38.6596	-0.958607	-49.5591	0.342423	-4.25571	-18.7011	-52.6289	-19.6615	-24.8477	0.447158	-5.98716	-3.56225	0	-11.6478	-4.31876	-15.4776	-16.1433	-33.9747	-10.3335	-17.3116	-38.5969
Ostreococcus_tauri	-26.6345	-79.9872	-40.5467	-2.69897	-46.8508	-5.67778	-11.6556	-24.58	-49.0867	-24.02	-29.5482	-6.93181	-4.56225	-5.23433	0.880814	-7.40561	-9.36653	-22.7305	-14.3635	-31.5622	-9.88606	-16.6459	-20.0496
Chlamydomonas_reinhardtii	0	-72.9393	-34.2218	0	-49.5784	-8.80134	-23.5129	-26.1785	-44.9355	-26.0205	-70.5751	-9.75696	-9.92082	-4.86012	0	-7.78252	-10.2916	-27.2277	-17.1463	-31.0306	-12.0048	-12.9208	-15.063
Plasmodium_falciparum	-20.8996	-25.8386	-3.15864	0	-10.2277	0.30103	-5.79317	-7.5986	-29.1494	-2.69897	-11.091	0	-9.23433	-0.619789	0	0	-11.219	0.875061	-21.58	-3.73518	-0.455932	-2.09691	-20.9172
Phytophthora_sojae	-45.6968	-66.4935	-35.2269	0	-44.8633	-11.857	-21.266	-11.2684	-43.7852	-12.9706	-24.9706	-8.86012	-2.52288	-8.09583	0	-2.39794	-5.13194	0.845098	-16.1427	-16.9393	-13.9245	-15.7011	-22.6861
Trypanosoma_brucei	-17.9626	-42.4449	-9.08991	0	-20.4365	0.518514	-17.6421	-8.98716	-24.5482	-6.79317	-24.1831	0	-5.9431	0	0	-2.69897	-7.20135	0	-18.1439	-12.8356	-2.1549	0	-17.1884
Dictyostelium_discoideum	-25.8794	-75.2007	-32.4067	-0.886057	-31.2534	0	-17.1421	-15.3565	-19.8297	-10.6819	-29.6517	0	-7.21325	-3.07624	0	-4.44491	-3.71897	0	-9.2321	-13.3197	-17.9747	-17.2612	-23.3279
Emiliania_huxleyi	-4.81816	-98.8327	-45.6576	0	-58.1524	-4.44009	-22.058	-12.3054	-36.6655	-14.6904	-26.2381	-4.28735	-1.46852	-27.9355	0	-23.1494	-7.32331	-1.25964	-10.5498	-18.5129	-14.6055	-21.1972	-23.7545
Cyanidioschyzon_merolae	-24.9469	-95.5031	-31.3188	0	-36.4123	-7.5376	-9	-18.1512	-26.2343	-14.3028	-17.7375	0	-5.05159	-8.10791	0	-3.30892	0	-17.9355	-11.7399	-25.6383	-7.76955	-10.4535	-10.5969
Guillardia_theta	-27.8508	-96.6596	-35.5784	0	-27.3478	0.531479	-27.0227	-16.5719	-31.8761	-25.821	-25.5302	-8.56225	-0.468521	-4.30715	0	-8.29757	-5.21968	-1.05552	-32.7011	-37.9208	-12.0521	-22.5719	-25.9101
Archaeoglobus_fulgidus	0	-45.1612	-3.06651	0	-36.3507	0.39794	-25.1871	-28.3307	-30.7496	0.50515	0	0	0.954243	0	0	-12.27	-0.337242	0	-10.5243	0	0	-4.56864	-18.1249
Thermoplasma_acidophilum	-0.161151	-31.4698	0	0	-26.8928	0	-29.3904	0.146128	-23.3391	-0.200659	0	0	0	0	0	0	0	0	-10.5686	0	0	0	0
Thermococcus_kodakarensis	0.944483	-51.5638	-0.387216	0.770852	-34.8794	0	-33.9547	-17.8962	-25.2097	-0.244125	0	0.724276	-10.8962	-0.148742	0	0	0	0	-43.9706	0	0	-3	-34.1891
Methanocaldococcus_jannaschii	0	-46.1904	-1.67778	0	-29.5952	0	-18.0458	-9.24565	-27.4056	0	-2.22185	0	0.0791812	0	0	0	0	0	-24.7496	0	0	-3.9914	-9.54516
Haloarcula_marismortui	0	-34.1574	-3.78781	0	-25.2644	0.70757	-16.9208	-12.4295	-15.8013	-3	0	0	0.462398	0.414973	0	0	0	0	-10.1302	0	0	-10.6757	-16.0491
Nitrosopumilus_maritimus	0	-43.2741	-0.376751	0	-22.8069	0.60206	-21.8013	0	-29.762	0	-44.8013	0	0	0	0	0	0	0	-25.3516	0	0	-16.8386	0
Pyrobaculum_calidifontis	0	-39.3391	0.869232	0	-15.2774	0.959041	-28.4622	-4.35556	-22.7258	0	0	0	-0.387216	0.919078	0	0	0	0	-27.5935	0	0	-0.638272	-6.5157
