# Supplementary material for: A tRNA modification in Mycobacterium tuberculosis facilitates optimal intracellular growth
Source: eLife. 2023 Sep 27;12:RP87146. doi: 10.7554/eLife.87146 (PMC10531406; doi:10.7554/eLife.87146)
Supplement: Figure 2—source data 1. [file elife-87146-fig2-data1.xlsx]

## Sheet: Fig. 2
Misincorporation	Species	-1	1	2	3	4	5	6	7	8	9	10	11	12	13	14	15	16	17	17A	18	19	20	20A	20B	21	22	23	24	25	26	27	28	29	30	31	32	33	34	35	36	37	38	39	40	41	42	43	44
Fig. 2A	Leu5_CAA	-	0	0.00817439	0.0025974	0.0025641	0	0	0	0	0.00475059	0	0	0	0	0.0136986	0.00662252	0.00659341	0	-	0.00652174	0	0	0.00416667	-	0.00200401	0.00603622	0.00198413	0	0.0119048	0.00990099	0.00197239	0	0.00195312	0	0.00980392	0	0	0.00580271	0.00582524	0.00760456	0.268921	0.00571429	0.00173762	0.00075071	0.00585707	0.00550286	0.000995181	0.000732294
	Phe_GAA	-	0.0104167	0	0	0	0	0	0.005291	0	0.00515464	0.00995025	0	0	0	0.00471698	0.00469484	0	0	-	0	0	0.0083682	0.0117188	-	0	0	0.0108696	0	0	0	0	0	0	0	0.00350877	0.00350877	0	0.00694444	0.0206897	0.0205479	0.252366	0.00409836	0.00106952	0.000894454	0.00174277	0.000867378	0.0137415	0.00562138
	Leu4_TAA	-	0	0	0	0.0322581	0	0.0322581	0.0645161	0	0.03125	0	0	0	0	0.0285714	0.0285714	0	0	-	0	0.025641	0	0.0243902	-	0	0.0208333	0	0	0	0.0222222	0	0	0	0	0	0	0	0	0	0	0.316832	0.0238095	0	0.000964785	0.00431035	0.00327409	0.000935235	0.00140121
	Trp_CCA	-	0	0.0015674	0.00103573	0.00103093	0.00103253	0.00102722	0.00102512	0.00102459	0.00101989	0.0188487	0.00050813	0.000505561	0.00100807	0.00452489	0.00050226	0.00200602	0.00150075	-	0.000499002	0.000998004	0.00298211	-	-	0.00147565	0.000488998	0.00342633	0.00195217	0.000487567	0.00582807	0.00338819	0.00145138	0	0.00241546	0	0	0.000483092	0.000481696	0	0.00335089	0.145902	0.003615	0.0029661	0.000591166	0.00439615	0.00194505	0.00284738	0.00420406
	Cys_GCA	-	0	0.00315457	0.00152905	0	0.00149031	0.164634	0	0	0.00146843	0.0175695	0.00291545	0.00291121	0.00289436	0.0101892	0.0130058	0.00143472	-	-	0.00281294	0	0.00140647	-	-	0.00559441	0.00278164	0.00275482	0	0.00138122	0.00549451	0.00274348	0.00136426	0.00271003	0	0	0.00135501	0.00135318	0.00944669	0.00134953	0	0.243316	0.00581395	0.000948767	0.00188147	0.00451713	0.00257459	0.000602864	0.0072018
	Ser2_CGA	-	0	0	0.000984252	0.000976563	0.00194553	0.00193424	0.0038059	0	0	0.00369686	0.000918274	0.00451264	0.00176835	0.0194004	0.00522648	0.00172117	-	-	0.00083612	0.00499584	0.00248963	0.000823045	0.00162075	0.010878	0.0129771	0.000753012	0	0.00825826	0.00149031	0.000739098	0.00810015	0.000729395	0.000720981	0	0	0.000719424	0.000708215	0.001386	0.00552868	0.0143149	0.0100739	0.00132538	0.00275938	0.0026738	0.00106101	0.00105319	0
	Ser1_TGA	-	0	0	0	0	0	0	0	0	0.0172414	0	0	0.0847458	0	0.0327869	0.0163934	0	-	-	0.015873	0	0	0	0	0	0.0128205	0.0128205	0.0121951	0.0120482	0.0240964	0	0	0	0	0	0	0	0	0	0.0107527	0.117647	0.0142857	0	0.00247372	0.000598802	0.0954712	0.00471976	0.00586855
	Tyr_GTA	-	0	0	0.00571429	0.0655738	0	0	0.00520833	0	0	0	0	0.00485437	0	0.0241546	0	0.0046729	-	-	0	0	0	0.00452489	0.00900901	0.00896861	0.00434783	0	0.00414938	0.00409836	0.00819672	0	0	0	0.00395257	0.00793651	0	0	0.00381679	0	0.00380228	0.251773	0.00569801	0.00307692	0.000962583	0.00351757	0.00155908	0.000359486	0.000777861
	Val3_CAC	-	0.000520788	0.0012847	0.000562786	0.00578932	0.0009046	0.000829302	0.00117007	0.000549337	0.00219073	0.0129852	0.00129799	0.00101633	0.000674218	0.00441457	0.00355872	0.000322768	-	-	0.00115548	0.0012192	0.00427024	-	-	0.00638447	0.000824925	0.00444868	0.00107697	0.000695762	0.00170411	0.000630795	0.000504382	0.00100604	0.00144509	0.000691042	0.0010675	0.00131744	0.00124805	0.00216799	0.00172531	0.0039115	0.001577	0.00180919	0.000727008	0.00192736	0.00144465	0.00240891	0.00288809
	Val2_GAC	-	0.00076746	0.00439319	0.00168122	0.0015445	0.0015311	0.101259	0.000380928	0.00062818	0.00184809	0.00753296	0.00102694	0.00065967	0.00131202	0.0166744	0.00218604	0.00263988	-	-	0.00107765	0.00186725	0.00462206	-	-	0.0106695	0.000616177	0.00560224	0.00100424	0.00211817	0.00144412	0.000332926	0.000387833	0.000165948	0.000441745	0.000440044	0.00065721	0.00070864	0.0111027	0.00237864	0.0017105	0.00302211	0.000841751	0.00145811	0.00125189	0.00413353	0.00479917	0.000884357	0.00479117
	Val1_TAC	-	0.00149165	0.00115048	0.00136612	0.00524515	0.00271432	0.00157693	0.00134892	0.000672797	0.000444148	0.00374367	0.000659051	0.00087604	0.000218627	0.00522534	0.00282486	0.0043573	-	-	0.00213402	0.00213538	0.00276243	-	-	0.00461216	0.0016691	0.00626697	0.00166563	0.000207814	0.000623571	0.000622148	0.00144897	0.0012389	0.00103157	0	0	0.000205761	0.0010248	0.00245549	0.00284206	0.0030248	0.00040201	0.0029964	0	0.000796813	0.00178607	0.00237812	0.000791452
	Gly1_CCC	-	0.00138718	0.00627281	0.00187869	0.00127179	0.00594291	0.000843259	0.00178048	0.000991546	0.0034706	0.00785623	0.000563582	0.000510386	0.00035506	0.014583	0.00571515	0.000452102	-	-	0.00100165	0.00326289	0.00274451	-	-	0.00745311	0.000780183	0.00459568	0.00409676	0.00116618	0.00750072	0.000764234	0.000852111	0.0032009	0.000844436	0.000468647	0.000655646	0.000654695	0.000606061	0.00102335	0.00111271	0.00626844	0.00417834	0.00160249	0.000228959	0.000960483	0.000823083	0.0033858	0.00297687
	Gly3_GCC	-	0.000506009	0.00468311	0.0010242	0.00125164	0.00490898	0.000608184	0.00123432	0.00105618	0.00254439	0.0100393	0.00206432	0.00153606	0.000269034	0.021829	0.00243739	0.000267695	0.00287211	-	0.00108851	0.00113795	0.0036076	-	-	0.00438205	0.00139001	0.00103319	0.00291487	0.000778562	0.00769482	0.000425393	0.000824052	0.00908166	0.000294183	0.000339996	0.000412531	0.000654292	0.00622632	0.00129998	0.000835482	0.00362379	0.00368307	0.000871039	0.000518123	0.000728503	0.000775103	0.00258519	0.00159564
	Gly2_TCC	-	0	0.00064288	0.000304507	0.000909918	0.000303122	0.000301659	0.000901984	0	0.0005997	0.00208893	0.000297619	0.000296912	0.000295683	0.00352113	0	0	-	-	0.000578704	0.000579206	0	-	-	0.0034642	0	0.00142816	0.00028547	0	0	0.000569476	0.000284414	0.000563698	0.000840336	0.000279955	0	0	0.000278707	0	0	0.00110988	0.00110896	0.000830105	0	0	0	0.00160858	0
	Ala3_CGC	-	0.000587855	0.00115702	0.000428755	0.00204635	0.00133124	0.000852434	0.0480316	0.000657493	0.00102617	0.0155201	0.00242458	0.00231728	0.000463049	0.00486855	0.0021702	0.000599714	0.00220042	-	0.00103632	0.00125945	0.00322798	-	-	0.000934455	0.00195001	0.00137041	0.00211799	0.000705436	0.00118906	0.00299705	0.000263725	0.000526062	0.000437886	0.0015735	0.00074291	0.000698385	0.000958188	0.0025852	0.000903731	0.0041177	0.000384336	0.000469965	0.00149152	0.00179112	0.00110714	0.000467986	0.00135633
	Ala2_GGC	-	0.000868383	0.00111286	0.000648088	0.00148882	0.00164707	0.000933406	0.0366225	0.000574731	0.000919992	0.0085248	0.0023146	0.00148434	0.000189245	0.00444599	0.00220417	0.00268562	0.00358949	-	0.000901545	0.00139726	0.00414861	-	-	0.00131894	0.00079353	0.000974837	0.002312	0.000638706	0.0036222	0.000759094	0.000242615	0.00199945	0.000363152	0.00271821	0.000633217	0.000571927	0.00743829	0.00257917	0.00119717	0.00277861	0.000953971	0.000536609	0.000714945	0.000595079	0.000565241	0.00077374	0.000892751
	Ala1_TGC	-	0.00153501	0.00168705	0.000834202	0.00135459	0.000728029	0.000622019	0.000206911	0.00113484	0.00101657	0.00867548	0.000806696	0.00100523	0.000301296	0.00833417	0.00210316	0.000500651	0.00269192	-	0.00128382	0.00207039	0.00628993	-	-	0.00409836	0.00145815	0.00476979	0.000873447	0.000970403	0.00329873	0.00087108	0.000580271	0.00106301	0.000675676	0.000289547	0.000578927	0.000289352	9.63e-05	0.00240546	0.00105779	0.00325297	0.00133946	0.000767092	0.00124414	0.000477054	0.00276586	0.000952653	0.00152425
	Glu2_CTC	-	0.000939457	0.00197647	0.00427231	0.00514548	0.000738484	0.000368121	0.00247888	0.000733676	0.000457834	0.00773571	0.000455	0.000544218	0.00126206	0.00264131	0.00471533	0.0052687	-	-	0.00130197	0.000782541	0.00103959	0.00051809	0.001378	0.00240385	0.00119699	0.000768508	0.00830053	0.000596862	0.00272016	0.000934262	0.000594328	0.00212098	0.000763165	0.000932994	0.000423513	0.000506842	0.00042038	0.000589226	0.00150602	0.00307105	0.000662581	0.0021357	0.00106829	0.000409836	0.00139356	0.00131201	0.00049128
	Asp_GTC	-	0.000956586	0.0018532	0.00413088	0.00433925	0.00117027	0.000647585	0.00168143	0.000193461	0.000707168	0.00944123	0.00212137	0.00204695	0.000447313	0.0037011	0.00145211	0.000379195	0.00119489	-	0.000678845	0.00061512	0.000614213	0.000611359	-	0.00295142	0.000817327	0.00139689	0.00133674	0.000638941	0.00197124	0.000695773	0.000983967	0.001156	0.000693201	0.000519751	0.000749496	0.00120863	0.00521281	0.00125428	0.00175528	0.00770615	0.00127998	0.00215422	0.00187804	0.00110302	0.000991517	0.000661193	0.003037
	Glu1_TTC	-	0.00258603	0.00770308	0.00154374	0.00444901	0.00101695	0.000338123	0.000168976	0.000336927	0.0011745	0.0143693	0.000667111	0.000830013	0.00131622	0.00446286	0.0102411	0.0344883	0.00298414	-	0.000936622	0.0020224	0.000774954	0.000308928	0.000615574	0.00408225	0.000748727	0.000747719	0.00718563	0.000447561	0.00312407	0.000892061	0.000890472	0.00118747	0.00074184	0.000148368	0.00118571	0.000888494	0.0038382	0.000735186	0.00156785	0.00473357	0.00792265	0.00133138	0.000266276	0.000796601	0.00199309	0.000797554	0.000663482
	Leu1_CAG	-	0.000651806	0.00130325	0.00169232	0.00450306	0.000875936	0.157454	0.00158341	0.000709443	0.00187882	0.0057808	0.00257712	0.00108334	0.00100409	0.00587871	0.00239327	0.000844141	-	-	0.00188637	0.00293719	0.00405071	0.00471976	-	0.00182229	0.0080427	0.000944699	0.00231582	0.000867616	0.00316912	0.000287604	0.000573394	0.00114564	0.00272031	0.000571919	0.000642628	0.000427137	0.000704722	0.0885864	0.000542189	0.497641	0.000604595	0.0014029	0.00117096	0.000842897	0.00516562	0.00141424	0.00012837
	Leu2_GAG	-	0.000475285	0.00026476	0.00153178	0.00147602	0.000970638	0.125697	0.000240732	0.000239751	0.000953289	0.00521822	0.00213119	0.00186829	0.00162942	0.0165772	0.0097493	0.000689338	-	-	0.00245098	0.00355082	0.0030776	0.00861141	-	0.00358877	0.012463	0.00104712	0.00187696	0.00062513	0.00228121	0.000413479	0.000616903	0.004313	0.00183861	0.000611746	0.00832318	0.000605449	0.00436421	0.207983	0.000579598	0.486127	0	0.000189215	0.0010772	0.000178508	0.00779727	0.00193526	0.000526039
	Leu3_TAG	-	0	0.00325733	0.000619195	0.00123533	0.000616523	0.000617284	0.00122699	0	0.00122175	0.00121877	0.0012158	0.000604595	0.072005	0.00847971	0.0012012	0	0.00238237	-	0.00117302	0.00117233	0	0.0017321	-	0.00114155	0.00798631	0.00282965	0.00163577	0	0	0.00157563	0	0.00104493	0.000522466	0.000522193	0.00104058	0.00102145	0.000908678	0.0145567	0.00126689	0.390305	0	0.0012285	0.00161225	0.000800961	0.000793651	0.000793336	0.000791452
	Arg2_ACG	-	0	0.000372301	0.000355366	0.000706464	0.000707214	0	0.000347705	0	0	0.00168067	0	0.000327761	0	0.000319081	0.000942211	0.000311526	-	-	0	0.000301386	0.00218955	0	-	0.00143431	0.00055142	0.00193477	0	0.000272628	0.00244366	0	0	0	0.000261097	0.000523423	0	0	0.992264	0.0015361	0.000254065	0.0964957	0.0015163	0.000236798	0.00131202	0.0219208	0.00089985	0.0036077	0.00326634
	Arg3_CCG	-	0.000585823	0.00442152	0.00351494	0.0034638	0.000687521	0.000342936	0.0010225	0	0.00202498	0.00658545	0.000654879	0.000323834	0.00160103	0.00789889	0.00154703	0.00402601	-	-	0.000615574	0.000307125	0.0134881	0.00120882	-	0.00537787	0.000543626	0.00870511	0.000808625	0.000538213	0.00106838	0.000533191	0.000265252	0	0.00104602	0.000522466	0.00130446	0.00416992	0.000259538	0.000512558	0.00408059	0.394211	0.00613811	0.000247647	0.00113422	0.00851116	0.00084074	0.00443539	0.00573203
	Pro1_CGG	-	0	0.000348028	0.000341686	0.000113302	0.000340175	0.000113148	0	0	0.000112397	0.00292201	0.000674536	0.000336247	0	0.00223214	0.00022205	0.000444	0.000221779	0.000110461	0.000220434	0.000329924	0.000878542	-	-	0.000218317	0.000325768	0.000108389	0.00032443	0	0.000323729	0.000107782	0.000215448	0	0.000107515	0.000321923	0.000214569	0.000321578	0.000747544	0.00391866	0.000528039	0.941412	0.000841043	0.0004111	0.00118429	0.0130684	0.0772623	0.00108531	0.00212752
	Pro2_GGG	-	0.000869565	0.000492975	0.000792152	0.000968934	0.00231242	0.000543708	0.000844646	0.000180625	0.000541256	0.00534824	0.00126156	0.00113875	0	0.00269962	0.000713818	0.000178306	5.95e-05	0.00011854	0.000827276	0.00094373	0.00229777	-	-	0.000584761	0.00058214	0.000465279	0.00151031	0.000116137	0.00162611	5.8e-05	0.000173802	0.000521135	0.000404741	0.00179346	0.000462508	0.000980732	0.00391007	0.000343879	0	0.512486	0.00085729	0.000171703	0.000503468	0.0011726	0.0021767	0.00100206	0.000278257
	Pro3_TGG	-	0	0.000449438	0.000441501	0.000439367	0.000438404	0	0.000873744	0	0	0.00129478	0.000430849	0	0	0	0	0.00127227	0.000847817	0	0	0.000421408	0.000420698	-	-	0.000839983	0.00125733	0	0.000417537	0	0	0.000415973	0	0.00041511	0.000414594	0.00041425	0	0	0	0.00532133	0	0.920065	0.000407	0.000402901	0.00104822	0.000260213	0.000779626	0.000781047	0.00207684
	Gln2_CTG	-	0.00167522	0.000495172	0.000628931	0.000674829	0.00043363	0.000432942	0.0882788	0.000238926	0.000429103	0.0091988	0.00023805	0.00056953	0.000331801	0.00502822	0.000471498	4.7e-05	0.00140719	-	0.000466135	0.000885492	0.0010225	-	-	0.000833565	0.00124971	0.000554196	0.00142772	0.000413337	0.00217825	0.000856357	0.00013508	0.000494716	0.000629298	0.00315131	0.000404404	0.000359034	0.000268877	0.0345058	8.9e-05	0.55187	8.87e-05	0.000309872	0.000694897	0.00155092	0.000944206	0.000986659	0.000428706
	His_GTG	0.000951614	0.000893796	0.00139788	0.000412435	0.0023172	0.00127858	0.000509996	0.00183234	0.000710227	0.0017023	0.00529782	0.000888582	0.000491957	0.000931875	0.00705768	0.00200669	0.000571238	0.00274868	-	0.00088475	0.00181336	0.00452593	-	-	0.00420751	0.0010195	0.00914864	0.00145901	0.000838408	0.0137107	0.000567512	0.000783085	0.00580162	0.000904003	0.00142045	0.000430126	0.000685195	0.00582013	0.00126818	0.00274054	0.00888588	0.000633259	0.000715428	0.000335909	0.000377374	0.00117376	0.00188751	0.00549335
	Gln1_TTG	-	0.00123916	0.000493746	0.00135335	0.000849515	0.000242101	0.000483734	0.000480307	0.000359842	0.000479444	0.00455417	0.000358938	0.000835621	0.000357143	0.0394183	0.0010627	0	0.00117633	-	0.000818139	0.00128625	0.000466636	-	-	0.000697918	0.00127551	0	0.00138777	0.000115433	0.000345861	0.000230362	0.000115009	0	0.000344392	0.00253194	0.00103282	0	0.000571494	0	0.000224845	0.602253	0.000329417	0.000108932	0.000316823	0.00358385	0.000629855	0.00178647	0.000314202
	fMetA_CAT	-	0.00180799	0.00104869	0.00338833	0.000877578	0.00189504	0.000870827	0.0020141	0.00114663	0.00255827	0.0199916	0.000560695	0.000417653	0.000277585	0.00734683	0.0037144	0.000411184	0.00163823	-	0.000405405	0.00161856	0.00121327	0.00120773	-	0.00446077	0.00104126	0.00482148	0.000779727	0.00116838	0.00142432	0.00622326	0.00375307	0.000128966	0.00141424	0.00553981	0.000514007	0.00166966	0.000256608	0.00204787	0.000380566	0.007999	0.00401707	0.000373181	0.000744417	0.00136054	0.000371012	0.00111002	0.000606943
	fMetB_CAT	-	0	0	0	0.00383142	0	0	0.00377358	0.0037594	0	0.00738007	0	0	0	0	0	0	0	-	0	0	0	0.00664452	-	0	0	0	0	0.0031746	0	0.00316456	0	0	0	0.0126183	0	0.00623053	0.242236	0	0.000581058	0.00684229	0.0398538	0.000333723	0.00217137	0.000827815	0.00115473	0.000494641	0.000988957
	fMetC_CAT	-	0.00291896	0.000936106	0.00420239	0.00119002	0.00150319	0.00209264	0.00220569	0.0011011	0.000836559	0.0156921	0.0139412	0.00116089	0.000554152	0.00853087	0.00158983	0.0011511	0.000437197	0.0011652	0.00151591	0.00151415	0.00303707	-	-	0.00150081	0.00185702	0.000396341	0.000380427	0.000538213	0.00105772	0.000647035	0.000661688	0.000535366	0.00091271	0.00284811	0.00078625	0.00146305	0.000658751	0.00126559	0.000545316	0.00263484	0.00241531	0.000743322	0.000308775	0.00055559	0.00208221	0.000800739	0.00146402
	Ile1_GAT	-	0.000724208	0.00184998	0.00160727	0.00422433	0.00154568	0.000714718	0.0393784	0.000435801	0.00101517	0.0120552	0.00100327	0.000734445	0.000366205	0.00678568	0.00254625	0.00509726	0.0017175	-	0.000670691	0.0007724	0.00051443	0.00143223	-	0.00261664	0.00146628	0.00645856	0.000731172	0.00112108	0.00111944	0.00038937	0.00043702	0.000291149	0.000290839	0.00168976	0.00057929	0.000867679	0.00667307	0.000862482	0.000238311	0.00722926	0.0031671	0.00108073	0.00102373	0.0022814	0.00567997	0.000836898	0.00102311
	Arg5_CCT	-	0	0.00581771	0.000617665	0.0012158	0	0.00180614	0.00119261	0.00237248	0.00465116	0.0192525	0.00168729	0	0.00110742	0.0218818	0.00162426	0.006469	-	-	0.00161638	0	0.0203185	0.0021322	-	0.00673575	0.000510465	0.00764916	0.00152516	0.00152053	0.011128	0.00201207	0.000497265	0.00248386	0.000991572	0	0	0.00147711	0.000491642	0.000977995	0	0.00870827	0.00627716	0.00431241	0.0019084	0.00238322	0	0.00140647	0.008916
	Ser3_GCT	-	0.000780031	0.000303122	0.0695948	0.000899281	0.000596125	0.00119154	0.00326409	0.00088968	0.00236616	0.00325155	0.0023488	0.1935	0.00112962	0.00706015	0.0025288	0.00253236	-	-	0.00139509	0.00390516	0.00139121	0.000554785	0.00221117	0.00581395	0.00635184	0.00137174	0.00163934	0.00191048	0.001638	0.00190944	0.000272628	0.000272331	0	0.0027115	0.000540541	0	0.00240513	0.000532056	0	0.00210416	0.00315043	0.000260824	0.000259202	0.00311365	0.00129299	0.00154839	0.000772599
	Arg4_TCT	-	0.00133869	0.00126823	0.00148368	0.000880799	0.000877706	0.000579878	0.00172911	0.00200631	0.00140687	0.0129763	0.000274273	0.00108992	0.000271739	0.0208899	0.00188071	0.00590604	0.00400534	-	0.0010582	0.00237029	0.0103038	0.00468872	-	0.00358607	0.00126871	0.00584201	0.00151515	0.000504159	0.00754527	0.00426493	0.00174259	0.00199104	0.00223769	0.000495786	0.000247831	0.000740924	0.000493583	0	0.000976086	0.00463981	0.00537241	0.000484262	0.000242189	0	0	0.000482393	0.00287287
	Thr2_CGT	-	0.00108409	0.00476969	0.0022121	0.00181113	0.000645578	0.000772798	0.000385654	0.000641601	0.00151343	0.0126124	0.00173439	0.000735204	0.000366435	0.014491	0.00410727	0.000602845	0.00203788	-	0.00176803	0.0029391	0.00293083	-	-	0.00385064	0.000929908	0.00780249	0.000811971	0.000463392	0.00104191	0.00580046	0.000924108	0.000230441	0.00114916	0.00376026	0.000790692	0.000224997	0.00112322	0.00122933	0.000334971	0.00323444	0.00155211	0.000776311	0.000995025	0.00132729	0.00575349	0.000770755	0.0013968
	Thr1_GGT	-	0.00232114	0.00710929	0.00145467	0.00290411	0.00126838	0.000344234	0.000514639	0.000854457	0.00144621	0.0128951	0.00141852	0.00108009	0.0010191	0.0109523	0.00469843	0.000407311	0.00171847	-	0.00222354	0.0035524	0.00259804	-	-	0.00547083	0.00100865	0.0102213	0.00124563	0.000812658	0.00262179	0.000858124	0.000285117	0.000379075	0.000425874	0.000896819	0.00546628	0.000560276	0.0052932	0.00169881	0.000456997	0.00519339	0.00370605	0.00189402	0.000809389	0.00157494	0.00287666	0.0032345	0.00381662
	Thr4_TGT	-	0.00148456	0.00431524	0.000863371	0.000428082	0.00128342	0.000632644	0	0.00125576	0.00122499	0.0200763	0.000798882	0.000395491	0.000196928	0.0175404	0.00156678	0.00117096	-	-	0.000967118	0.00154351	0.00422346	-	-	0.0121281	0.000187582	0.00769953	0.0011217	0.000932662	0.00859492	0.00074308	0.000556586	0.000741015	0.00240296	0.000923702	0.000737599	0.000735835	0.000916254	0.00145932	0.000181455	0.00616165	0.00233771	0.00179051	0.000894935	0.00160915	0.00179115	0.0014301	0.00392087
	Lys2_CTT	-	0.000942253	0.00501966	0.00131213	0.00286156	0.00268528	0.00144685	0.000455962	0.00105812	0.00166269	0.0134809	0.00183512	0.00055995	0.000278901	0.0299426	0.00331377	0.000482227	0.00155805	-	0.00147758	0.00166028	0.00341945	-	-	0.00649833	0.00140073	0.0155266	0.000728155	0.000665819	0.00914265	0.00269558	0.000357931	0.000474637	0.000826886	0.00615567	0.000530723	0.000235087	0.000469732	0.0006411	0.000638755	0.00742503	0.00502861	0.000288052	0.00114705	0.00266033	0.000956776	0.0011229	0.00548129
	Asn_GTT	-	0.00298444	0.00163873	0.00267703	0.00220223	0.00169173	0.000623714	0.00149356	0.00105328	0.00207052	0.0041043	0.000903179	0.000600673	0.00053973	0.0466237	0.00382409	5.95e-05	0.00207444	-	0.00087822	0.00233809	0.00619751	-	-	0.00420404	0.00133245	0.00945916	0.000720182	0.00110687	0.00165572	0.000441136	0.000716017	0.000823407	0.00136485	0.00305744	0.000926986	0.00103469	0.00244366	0.000270548	0.000484992	0.00740621	0.00386245	0.00106678	0.000799062	0.00158722	0.00259975	0.00180257	0.00211618
	Lys1_TTT	-	0.00180383	0.00478286	0.000547945	0.0012725	0.000901063	0.000358423	0.0415387	0.000353732	0.00104749	0.0123029	0.00121003	0.000343584	0.0003427	0.0157669	0.00187298	0.000509944	0.00219855	-	0.000984575	0.00114547	0.00357782	-	-	0.00384369	0.000317864	0.0114924	0.000316556	0.000158078	0.000473485	0.00441362	0.000157011	0.000779788	0.000623733	0.0572143	0.000465983	0.0206918	0.00153516	0	0.000576701	0.00424135	0.0101894	0.000259101	0.000515929	0.000901713	0.00333419	0.00230032	0.00420376
Termination	Species	-1	1	2	3	4	5	6	7	8	9	10	11	12	13	14	15	16	17	17A	18	19	20	20A	20B	21	22	23	24	25	26	27	28	29	30	31	32	33	34	35	36	37	38	39	40	41	42	43	44
Fig. 2B	Leu5_CAA	-	1	0.390244	0.0440415	0.0153061	0.00507614	0.0125313	0.0123762	0.0122249	0.0285036	0.00707547	0.00702576	0.00697674	0.00692841	0.0181406	0.0328947	0.00653595	0.0043384	-	0.00431965	0.00856531	0.00213675	0.0390144	-	0.0240481	0.002	0.00793651	0.0019802	0.00197628	0.00197239	0.00976562	0	0.00967118	0.0019305	0.00192678	0.00192308	0.00573614	0.0019084	0.00190476	0.0168539	0.152381	0.292929	0.233878	0.937731	0.016793	0.00560121	0.000680059	0.00125392
	Phe_GAA	-	1	0.448276	0.0113636	0.00564972	0.0166667	0.0322581	0.015873	0.00526316	0.025641	0.0298507	0.0195122	0.0191388	0.00947867	0.00471698	0.00469484	0	0.044843	-	0.0429185	0.00851064	0.0167364	0.0664062	-	0.0518519	0.0252708	0.00359712	0.00358423	0.00357143	0.0106007	0	0.00352113	0.00699301	0.00348432	0	0	0.00347222	0.00346021	0.010274	0.0135135	0.075	0.565217	0.216187	0.916078	0.0284796	0.00251169	0.00129747	0.0042205
	Leu4_TAA	-	1	0.3	0	0.0322581	0	0	0	0	0.03125	0.0588235	0	0	0	0.0285714	0	0	0.0277778	-	0.0526316	0.025641	0	0.0714286	-	0.125	0	0	0	0	0	0.0204082	0.183333	0	0.0163934	0	0	0.016129	0.015873	0.0307692	0.0972222	0.368421	0.191489	0.198864	0.957682	0.0253105	0.0051294	0.000931749	0.00116333
	Trp_CCA	-	1	0.689943	0.0118435	0.00154242	0.00154004	0.000513084	0.00153688	0.000512033	0.00407955	0.0015275	0.00456158	0.00604534	0.000503525	0.00301205	0.00200401	0.00150075	0.0014985	-	0.00348432	0.00099453	0.00248016	-	-	0.0103093	0.00730994	0.000487092	0	0.000973236	0.00436047	0.00241663	0.000965717	0.000964785	0	0	0	0.000963855	0.001924	0.00239923	0.00382409	0.0122757	0.0459459	0.0652632	0.79973	0.0360104	0.00428976	0.0010511	0.00266108
	Cys_GCA	-	1	0.422292	0.0274809	0.017991	0.00891531	0.00443787	0.00294985	0.00147275	0.00439883	0.00292398	0.00436681	0.00434783	0.004329	0.00144092	0.00857143	0.00990099	-	-	0.0180556	0.00138696	0	-	-	0.0082531	0.0068306	0.00813008	0	0	0.00135318	0.00269906	0.00403226	0.00667557	0	0	0	0.00266312	0.00265604	0.00132626	0.00396301	0.00525624	0.128293	0.181818	0.833281	0.0229008	0.0111715	0.00375996	0.00493864
	Ser2_CGA	-	1	0.662539	0.0462598	0.0107108	0.00484496	0.0048216	0.0133206	0.00473485	0.0204082	0.00369686	0.00915751	0.0188679	0.0193833	0.0061296	0.0180567	0.0144068	-	-	0.0264026	0.00574241	0.00327065	0.00730519	0.0136109	0.0429119	0.0210053	0.00744602	0.00444774	0.00295639	0.00514706	0.00657414	0.00725163	0.00505051	0.0114123	0.000712758	0.00142349	0.000711238	0.0167832	0.0212183	0.00273038	0.0180965	0.0164799	0.00914435	0.163388	0.0296925	0.00789058	0.00834637	0.00363825
	Ser1_TGA	-	1	0.692308	0.0545455	0.0178571	0	0	0	0.0175439	0.0172414	0	0.0333333	0.0322581	0.0606061	0	0	0	-	-	0.0434783	0.0142857	0	0.0277778	0.0526316	0.0617284	0.0357143	0	0.0454545	0.011236	0	0.0430108	0.0106383	0	0.0105263	0	0	0	0.0306122	0	0.029703	0.0818182	0.256757	0.177778	0.889163	0.0362018	0.00531287	0.00877706	0.00523865
	Tyr_GTA	-	1	0.70122	0.0837989	0.0376344	0.0210526	0.0104167	0	0.0204082	0.02	0.00497512	0.00985222	0.0145631	0.0143541	0.00476191	0.0322581	0.0136364	-	-	0.00900901	0.00448431	0	0.0132743	0.00877193	0.00869565	0.0212766	0.0289256	0.0162602	0.0120482	0	0.019685	0.00392157	0.0077821	0.00772201	0.0114504	0.00757576	0.011236	0.021978	0.00364964	0.00363636	0.0677966	0.191781	0.44864	0.979463	0.0286575	0.00590138	0.000748346	0.00134521
	Val3_CAC	-	1	0.182637	0.00836967	0.00357418	0.0112258	0.00331515	0.00453764	0.00144171	0.00348909	0.00225256	0.00170358	0.00690262	0.00390967	0.0235635	0.0178421	0.00283633	-	-	0.0057044	0.00204682	0.00502768	-	-	0.00190561	0.00228151	0.000823202	0.00132802	0.0010108	0.00145092	0.00044139	0.000630159	0.00301564	0.00081607	0.000313775	0.000564476	0.000939909	0.00523593	0.00809942	0.00547254	0.00738525	0.00763174	0.00572117	0.000481551	0.00126247	0.000600817	0.000240269	0.000720288
	Val2_GAC	-	1	0.555964	0.0536394	0.0049397	0.0063743	0.00203562	0.00241147	0.0101759	0.0204283	0.0135357	0.00555321	0.00719123	0.00548304	0.025836	0.0103993	0.00366363	-	-	0.0106473	0.0027111	0.00455414	-	-	0.00179594	0.00318881	0.00189849	0.00161668	0.000891166	0.00316473	0.000887558	0.00182724	0.00138236	0.00193157	0.00368395	0.00432497	0.00457766	0.00681966	0.0030218	0.0100956	0.00936607	0.00646654	0.00989017	0.000364242	0.000260105	0.000623863	0.000727311	0.000415433
	Val1_TAC	-	1	0.233547	0.00725953	0.00181159	0.00361011	0.0018018	0.00202293	0.00224266	0.00977126	0.00902289	0.00263389	0.00262697	0.00131176	0.00565217	0.00173611	0.00238147	-	-	0.0147184	0.00191612	0.0021245	-	-	0.0148598	0.00354536	0.00166563	0.0014553	0.000623312	0.000622924	0.00269207	0.00268484	0.00226664	0.00164575	0	0.000205677	0.00184767	0.00368174	0.00305873	0.00688538	0.00623868	0.00260939	0.00796495	0.00119332	0.00317209	0.00217606	0.000988142	0.000395101
	Gly1_CCC	-	1	0.272146	0.0480867	0.00867679	0.00184833	0.0024759	0.00638576	0.00307869	0.0084851	0.00775194	0.00276455	0.00357088	0.00608427	0.00509483	0.0026664	0.00255921	-	-	0.00414772	0.000599311	0.0034342	-	-	0.0146633	0.00667381	0.000681531	0.000972668	0.00184466	0.012606	0.00405767	0.00922291	0.00625118	0.00281215	0.000515295	0.00102953	0.000981767	0.00330833	0.0030196	0.00314902	0.00667004	0.00453338	0.00164579	0.000274223	0.000319825	0.000182723	0.000410959	0.000273898
	Gly3_GCC	-	1	0.512066	0.0537289	0.00465035	0.000987224	0.00327034	0.00860758	0.00516641	0.0324238	0.0127066	0.00545085	0.00721536	0.00123693	0.00203945	0.00264961	0.00125632	0.00624236	-	0.0256994	0.00237536	0.00200984	-	-	0.0127951	0.00714737	0.00294621	0.00251181	0.000677728	0.00272855	0.0010003	0.00212113	0.00797128	0.0102661	0.00932084	0.000776134	0.00138058	0.00429278	0.00312538	0.00824968	0.00839323	0.00491707	0.0015269	0.00037571	0.00018782	0.000539691	0.000281499	0.000328307
	Gly2_TCC	-	1	0.371311	0.0448621	0.00181543	0.00120882	0.00241182	0.00330529	0.000300391	0.00269623	0.00417661	0.00415924	0.00325733	0.00206856	0.0125474	0.00406859	0.0026087	-	-	0.00231348	0.0011554	0.00230548	-	-	0.00487525	0.0048516	0.000570451	0.000570125	0.000569801	0.000284819	0.00198977	0.00226886	0.00899382	0.00614525	0.00111607	0.00139315	0.00139121	0.000556174	0.00194283	0.00193906	0.00193531	0.00165609	0.00110284	0.000826446	0.00165017	0.0132972	0.0152325	0.0013344
	Ala3_CGC	-	1	0.18395	0.00837139	0.00142491	0.000901628	0.00231986	0.00410203	0.00408527	0.00671642	0.000931966	0.000931099	0.00504887	0.00055553	0.00129456	0.00221433	0.00133604	0.00545246	-	0.0175115	0.00206649	0.00206222	-	-	0.00849002	0.00416095	0.00181159	0.00180832	0.000705188	0.00140839	0.000703699	0.0013177	0.00302155	0.000700158	0.00200891	0.000261963	0.000741678	0.00274104	0.0107601	0.0013754	0.00393869	0.00311553	0.00200187	0.0014036	0.000255135	0.00025507	0.000594808	0.00435702
	Ala2_GGC	-	1	0.137929	0.0067561	0.00164591	0.00074172	0.00218811	0.00339929	0.00434241	0.00678654	0.001172	0.000759638	0.00302935	0.000756764	0.00141692	0.00119508	0.0011309	0.0070495	-	0.00471888	0.00114736	0.00170263	-	-	0.0103551	0.00481722	0.00149172	0.00121625	0.000395125	0.000759278	0.000576719	0.00139432	0.00154349	0.000544465	0.00274501	0.00087402	0.00180505	0.00395541	0.00131673	0.000747585	0.00262459	0.00169714	0.000535651	0.000267754	0.000416332	0.000327011	0.000297194	0.000118864
	Ala1_TGC	-	1	0.113368	0.00613816	0.000727726	0.000830996	0.00248679	0.00175838	0.00268207	0.0152377	0.0073611	0.0026149	0.00160659	0.000401485	0.00150331	0.00110121	0.00090018	0.00348849	-	0.0112348	0.000984543	0.00176904	-	-	0.00789782	0.00349786	0.00106765	0.00048506	0.000484825	0.00145236	0.00067731	0.00077347	0.00135174	0.000482532	9.65e-05	9.65e-05	0.000578592	0.00134823	0.00125036	0.00144064	0.00487432	0.00124093	0.00057241	9.54e-05	0.000190749	0.00123833	0.00038088	0.000190404
	Glu2_CTC	-	1	0.108332	0.00352113	0.00277213	0.00239675	0.00211572	0.00266055	0.000550156	0.00164775	0.00591501	0.000545703	0.00299238	0.00585955	0.0246197	0.00949312	0.00217259	-	-	0.00372294	0.0003462	0.000259583	0.0023308	0.0024113	0.00522573	0.00341501	0.00178967	0.000425931	0.000340628	0.00297164	0.000169779	0.000424268	0.000847817	0.000508431	0.000592818	0.00126871	0.00244684	0.00445191	0.00284781	0.00267313	0.00853073	0.00437041	0.00671636	0.000163787	0.00016376	0.000654611	8.18e-05	0.000327172
	Asp_GTC	-	1	0.106356	0.00575126	0.00332204	0.00246914	0.00336744	0.00193899	0.00232138	0.00327785	0.000963144	0.000898127	0.00345224	0.000830406	0.00400814	0.00876584	0.000693219	0.00332894	-	0.0190388	0.00264241	0.000552758	0.00476773	-	0.0358322	0.0103814	0.00279167	0.00162583	0.000464306	0.00214282	0.000115814	0.0013301	0.00161663	0.00011546	0.000634628	0.00144026	0.00178274	0.00588841	0.00347519	0.00785666	0.00918459	0.00899101	0.00645161	0.000385845	0.000275528	0.00104591	0	0.000110084
	Glu1_TTC	-	1	0.133552	0.00938887	0.00458793	0.00338696	0.00169062	0.00101334	0.00252695	0.00419393	0.00467524	0.0015005	0.00481168	0.00839092	0.0321656	0.0133543	0.00281999	0.00421217	-	0.00650961	0.000619579	0.000464468	0.00231696	0.00369344	0.0207957	0.00718133	0.00283455	0	0.000596392	0.00415739	0.000148456	0.00103811	0.000592856	0	0.000148192	0.000444379	0.000296165	0.00354139	0.00440723	0.03048	0.0583423	0.00745474	0.00278773	0.000265428	0.000132696	0.000265322	0.000132644	0.000265217
	Leu1_CAG	-	1	0.377999	0.0101107	0.00264106	0.00596659	0.00214337	0.00348074	0.0037828	0.00688738	0.00210872	0.00194871	0.00750425	0.00193035	0.00138792	0.00276817	0.00298988	-	-	0.0179929	0.00210352	0.00389134	0.0173542	-	0.00961328	0.000800466	0.00188844	0.00484279	0.000650101	0.00417206	0.00107782	0.00286594	0.00143092	0.000857817	0.000428725	0.00142704	0.00305876	0.0102788	0.0105879	0.0289502	0.00518135	0.00241659	0.00963968	0.0238173	0.0020724	0.00573084	0.00288925	0.0010903
	Leu2_GAG	-	1	0.443239	0.0440172	0.0325502	0.00921436	0.00314237	0.00433213	0.00407478	0.00690312	0.00403035	0.00307256	0.012141	0.0037218	0.00232072	0.00553889	0.00619266	-	-	0.0311111	0.00508512	0.0072432	0.025246	-	0.0157928	0.00210128	0.00460155	0.00437318	0.000832293	0.00496894	0.00268429	0.00513558	0.00266339	0.0040808	0.00183299	0.0040568	0.00604839	0.0178218	0.0157864	0.00984176	0.00288628	0.00364264	0.0165913	0.0506533	0.00374465	0.0114578	0.00421274	0.00227671
	Leu3_TAG	-	1	0.431322	0.0370828	0.00185071	0.000616523	0.000616143	0.00429448	0.00122549	0.003663	0.00304321	0.00242866	0.00483384	0.00301205	0.00120337	0.00359712	0.00179533	0.00535714	-	0.0152403	0.00233918	0.000584454	0.0132641	-	0.0136519	0.00113636	0.00508762	0.0364924	0.0249602	0.0136197	0	0.00156904	0.00260824	0	0.00104221	0.00518403	0.0183206	0.110054	0.0353866	0.0370215	0.0120532	0.00619579	0.0138493	0.0148475	0.00518962	0.00870597	0.000790826	0.00236686
	Arg2_ACG	-	1	0.569424	0.0420941	0.00282187	0.00176056	0.0059503	0.00729673	0.00311742	0.0146758	0.017438	0.0106171	0.0127743	0.00391517	0.0272929	0.0140801	0.0105263	-	-	0.0232839	0.00571257	0.00150105	0.00685748	-	0.0422616	0.035793	0.00465881	0.00354997	0.00245165	0.00810592	0.011485	0.0116156	0.00603516	0.00599896	0.00182244	0.00155966	0.00465718	0.00489186	0.00664962	0.00786602	0.00101394	0.0130098	0.0584217	0.85356	0.0286174	0.00712004	0.00222421	0.000331862
	Arg3_CCG	-	1	0.382863	0.0399167	0.00655172	0.00343643	0.00239973	0.00613288	0.00170068	0.00809717	0.025	0.00653595	0.010989	0.00992	0.0169865	0.0179178	0.00246533	-	-	0.00490647	0.00488251	0.0018276	0.00785736	-	0.067099	0.0384928	0.00566038	0.00188324	0.00134336	0.00614152	0.00186567	0.00582936	0.0110063	0.0031348	0.000522193	0.00156413	0.00208116	0.00311203	0.0138107	0.00305966	0.000509684	0.00884062	0.0265552	0.489327	0.0320856	0.015554	0.00523685	0.00213777
	Pro1_CGG	-	1	0.922176	0.0230028	0.00101879	0.000452591	0.000565419	0.00146793	0.0033761	0.00134862	0.000786075	0.000224542	0.00346834	0.000559097	0.00367647	0.00465735	0.0013289	0.00121668	0.00209713	0.00362917	0.00175651	0.000109769	-	-	0.00730086	0.00444782	0.00216497	0.00183684	0.000432012	0.00172507	0.00107701	0.000968367	0.000752607	0.000966702	0.00171563	0.000642949	0.00128425	0.00320034	0.00867174	0.00442198	0.000946671	0.00304111	0.0244501	0.678591	0.0047125	0.000784801	0.00146934	0.000587391
	Pro2_GGG	-	1	0.858216	0.0170056	0.000786116	0.000302261	0.00108696	0.00138696	0.00168563	0.00234234	0.000840134	0.000599736	0.0021544	0.000478526	0.00214874	0.00481141	0.00160123	0.000474215	0.00189327	0.00336105	0.000648203	0.000706631	-	-	0.00817661	0.00418751	0.00139389	0.00069646	0.000116063	0.000348068	0.00052183	0.00138961	0.000809951	0.00144425	0.00017328	0.000750317	0.0023608	0.00246985	0.00400458	0.000914495	0.000228571	0.00222362	0.00227544	0.0180427	0.0026741	0.00100178	0.00100078	0.000444593
	Pro3_TGG	-	1	0.919623	0.0202376	0.0017567	0.00175362	0.00131349	0.00218436	0.00174444	0.00477431	0.0064683	0.00258064	0.00979557	0	0.000425713	0.00508259	0.00042337	0	0.00169062	0.00462768	0	0.000420521	-	-	0.00293501	0.00334308	0.00125209	0.000417188	0	0.0020816	0.00207727	0	0.00165906	0.00206954	0	0.000413736	0.00123967	0.00411523	0.00735294	0.00285132	0.0012205	0.00364816	0.0135946	0.345973	0.00906971	0.0007768	0.00103466	0.00154959
	Gln2_CTG	-	1	0.527824	0.0243503	0.00139638	0.00067366	0.0003848	0.00211193	0.00458672	0.00233567	0.000619284	0.000904288	0.00327325	0.000853161	0.00193954	0.00564467	0.00136227	0.00224972	-	0.00721232	0.00106907	0.000557465	-	-	0.00384099	0.00124792	0.00110803	0.0037715	0.00179055	0.0134523	0.00580898	0.000719975	0.000944075	0.000628987	0.000224588	0.000224537	0.00116623	0.00138858	0.00521344	0.00262211	0.000577418	0.00168499	0.0031384	0.0190356	0.00846984	0.00248746	0.000557222	0.000385621
	His_GTG	1	0.285714	0.00983386	0.00663239	0.00409626	0.00245173	0.00198807	0.00218718	0.00263799	0.0148433	0.010582	0.00212178	0.00339316	0.00299078	0.0119174	0.0158291	0.00199848	0.00492424	-	0.0174916	0.00167193	0.00563406	-	-	0.0319639	0.00960772	0.00194432	0.000794772	0.00123479	0.00757145	0.0032282	0.00347781	0.00695044	0.00335599	0.00055902	0.000343894	0.00440811	0.0084868	0.00409923	0.00273938	0.000505476	0.000547299	0.00168117	0.00159456	0.00104795	0.000419006	0.000125686	0.000167553
	Gln1_TTG	-	1	0.867596	0.257522	0.0054519	0.00133091	0.00181159	0.006241	0.000839429	0.000838725	0.000718391	0.00119589	0.0032185	0.00154725	0.00473821	0.00623896	0.00176263	0.00234467	-	0.00536381	0.000931966	0.000465766	-	-	0.00452069	0.00138905	0.000578436	0.00265374	0.000461308	0.00138201	0.00115035	0.00126379	0.00114758	0.000688073	0.000114666	0.000802016	0.00125873	0.00228337	0.00182336	0.0153725	0.017745	0.00537163	0.00772327	0.0317042	0.00440436	0.00125681	0.000209424	0.000941521
	fMetA_CAT	-	1	0.177424	0.0121933	0.00772595	0.00174622	0.00261248	0.00934579	0.00315322	0.0099333	0.00816326	0.00545913	0.00625956	0.00249757	0.00428295	0.00522265	0.00342419	0.00449959	-	0.01039	0.000808952	0.000269578	0.00469547	-	0.0235787	0.00676555	0.00103977	0.00116838	0.000519009	0.0023301	0.00103453	0.00116249	0.00193374	0.00346865	0.000256871	0.000128419	0.000898127	0.00102538	0.00281186	0.00823932	0.0164568	0.00149384	0.00173978	0.00186058	0.00333787	0.000123609	0.00246609	0.0168505
	fMetB_CAT	-	1	0.239382	0.0152091	0	0.00378788	0	0.00377358	0.0037594	0.0111524	0.0110294	0	0.00729927	0.00363636	0.00362319	0.00719425	0.00358423	0.00357143	-	0.0540541	0.00671141	0	0.0165016	-	0.0288462	0.0157729	0	0	0	0.00314465	0.0031348	0	0	0.00623053	0.00310559	0.00617284	0	0.00613497	0.281938	0.736964	0.707408	0.0150276	0.00349418	0.00430749	0.00280853	0.00263635	0.000329435	0.000329327
	fMetC_CAT	-	1	0.900881	0.0222008	0.00669001	0.00229082	0.0010701	0.00110181	0.000870823	0.00206598	0.00155526	0.000948627	0.00285407	0.00179077	0.00303507	0.00254169	0.000792637	0.00100192	0.00171004	0.0034725	0.00049812	0.00113955	-	-	0.00750287	0.00578071	0.000854498	0.000458687	0.000758629	0.00249094	0.000315209	0.00171494	0.00102163	0.000832326	0.000282597	0.000188362	0.000423636	0.00191055	0.00422599	0.00281458	0.00575139	0.00192886	0.000801764	0.000446938	0.000369743	0.00146143	0.000845374	0.000291953
	Ile1_GAT	-	1	0.15412	0.00691181	0.000718311	0.00237032	0.00263896	0.0043245	0.00501089	0.0200683	0.00993447	0.00268775	0.00571159	0.00188284	0.00494405	0.00259538	0.00171002	0.00051792	-	0.0055112	0.00128601	0.000308547	0.00582822	-	0.0364057	0.00883789	0.00141401	0.000730852	0.000389636	0.00102175	0.000389086	0.00174783	0.000727731	0.00116302	0.00410212	0.000675187	0.00101176	0.00450839	0.00224913	0.00476258	0.0110216	0.00164582	0.00183056	0.00980666	0.00069667	4.64e-05	0.000324992	0.000232083
	Arg5_CCT	-	1	0.364103	0.0429448	0.0133172	0.00241546	0.00361011	0.00894454	0.00533808	0.0220418	0.024335	0.00674536	0.0111173	0.00497788	0.0152505	0.00703083	0.00537924	-	-	0.00161117	0.00214362	0.00107066	0.00479488	-	0.0324742	0.0107088	0.00406298	0.00101471	0.0030349	0.00453172	0.0025113	0.010929	0.0024777	0.000990099	0.00148295	0.00148075	0.00344319	0.00245339	0.00536847	0.00678623	0.00530376	0.00670498	0.00618753	0.000475737	0.000475511	0.00520341	0.0107628	0
	Ser3_GCT	-	1	0.224909	0.00898742	0.00298686	0.00268096	0.00119012	0.00267062	0.00059312	0.00266193	0.00147667	0.00732923	0.0276511	0.0109952	0.00084507	0.00448682	0.00335383	-	-	0.00472879	0.00138889	0.000277701	0.00194013	0.00386527	0.000276014	0.00412314	0.00301453	0.00409389	0.00163488	0.000816771	0.000544218	0.000272035	0	0.00108696	0.004329	0.00215983	0.00430107	0.00747065	0.0042508	0.00869107	0.00341207	0.00470219	0.00364394	0.00569358	0.000775795	0.00206452	0.00154599	0.00231363
	Arg4_TCT	-	1	0.29519	0.0622052	0.00411039	0.00409357	0.00869565	0.00690846	0.00429923	0.0193929	0.0187534	0.0063031	0.00626362	0.00244499	0.00647773	0.00510204	0.00401177	0.00186866	-	0.0103038	0.00499474	0.0015748	0.008329	-	0.0196479	0.00709399	0.00227502	0.00226986	0.00100781	0.00601052	0.00299626	0.00521609	0.000496524	0.00148736	0.000990589	0.000989609	0.00296004	0.00123183	0.0027027	0.00780107	0.00194647	0.00363636	0.00217707	0.000725163	0.00120715	0.000964785	0.000723066	0.00907571
	Thr2_CGT	-	1	0.134914	0.0301455	0.00568475	0.00116144	0.00218903	0.00167117	0.00179648	0.0183902	0.00960579	0.00792079	0.0102891	0.00305288	0.00823544	0.00422094	0.00156532	0.00729142	-	0.0157647	0.00152708	0.00199297	-	-	0.00582751	0.00360005	0.00173893	0.000810842	0.000694525	0.0011562	0.000693241	0.00115407	0.00310631	0.00218115	0.00955088	0.00856724	0.00359429	0.000897767	0.00535774	0.000557787	0.00233723	0.00630392	0.000773566	0.0016549	0.000661521	0.000661084	0.00186957	0.0254019
	Thr1_GGT	-	1	0.133286	0.0200498	0.0031194	0.0032819	0.00378571	0.00325882	0.00375918	0.0242859	0.0132163	0.00675418	0.00922828	0.00675386	0.0314106	0.0179973	0.00218752	0.009024	-	0.0217005	0.00167405	0.00489956	-	-	0.014343	0.00666795	0.00134138	0.00114843	0.00138577	0.00276388	0.000476304	0.00318108	0.00265177	0.001513	0.00254669	0.00483409	0.00671297	0.0131573	0.00421458	0.00278666	0.00567795	0.00877983	0.00197717	0.00148068	0.00058296	0.000403425	0.000313676	0.000626959
	Thr4_TGT	-	1	0.243146	0.0444492	0.00385027	0.00213447	0.0126449	0.00398824	0.0029301	0.0252958	0.0172414	0.00518548	0.00987362	0.00275699	0.00587314	0.00117325	0.00292455	-	-	0.00888889	0.00289017	0.00422103	-	-	0.0173454	0.00674157	0.00205569	0.00130646	0.00111857	0.00204651	0.00185701	0.00111297	0.00148176	0.00295475	0.000184638	0.00165899	0.002574	0.00402857	0.00510111	0.00435335	0.00433448	0.00894935	0.00125134	0.00160628	0.000535141	0.000534855	0.000178253	0.000890472
	Lys2_CTT	-	1	0.386996	0.0671234	0.00284004	0.00367085	0.00479488	0.00167161	0.00566636	0.0439179	0.0182953	0.00725097	0.00692114	0.00313611	0.00623312	0.00468739	0.0022696	0.0167039	-	0.0515074	0.00618346	0.00671183	-	-	0.0254844	0.0135135	0.00339723	0.00169574	0.00133059	0.004935	0.00616066	0.00381338	0.00533397	0.00424904	0.000589797	0.00111936	0.00287846	0.00105628	0.0075131	0.00319303	0.00404741	0.00448972	0.00137955	0.00343702	0.0133386	0.00629037	0.0012901	0.00430047
	Asn_GTT	-	1	0.652676	0.148771	0.0056391	0.0029985	0.00174607	0.00279833	0.00377896	0.0175887	0.00898673	0.00246676	0.00246069	0.00131863	0.00298793	0.00339468	0.00208011	0.00319905	-	0.0141914	0.00238872	0.00659799	-	-	0.0335608	0.00881521	0.000720222	0.00105152	0.00066368	0.00248262	0.000716688	0.00165116	0.0031274	0.00594491	0.000327136	0.000218043	0.00136092	0.00374207	0.00254246	0.00414804	0.00764461	0.00192082	0.00138534	0.00212676	0.00565689	0.000158579	0.000158554	0.000369822
	Lys1_TTT	-	1	0.162611	0.0368823	0.00398118	0.00522052	0.00448029	0.00570207	0.00777935	0.0137751	0.00658237	0.00431183	0.00531824	0.00188356	0.00494122	0.00204047	0.0016975	0.00439412	-	0.03	0.00277914	0.0052041	-	-	0.0167893	0.00761663	0.00158428	0.00221309	0.000316056	0.00330761	0.00267044	0.00406758	0.00683654	0.000621118	0.000155255	0.00263239	0.00600277	0.00551048	0.00548029	0.0563137	0.0533116	0.048771	0.00335224	0.00282849	0.00205286	0.00345224	0.00318634	0.0341007
[truncated: 48 more columns]
