# Supplementary material for: A tRNA modification in Mycobacterium tuberculosis facilitates optimal intracellular growth
Source: eLife. 2023 Sep 27;12:RP87146. doi: 10.7554/eLife.87146 (PMC10531406; doi:10.7554/eLife.87146)
Supplement: Figure 3—figure supplement 1—source data 1. [file elife-87146-fig3-figsupp1-data1.xlsx]

## Sheet: Figure 3-figure supplement 1
Figure 3-figure supplement 1A		-1	1	2	3	4	5	6	7	8	9	10	11	12	13	14	15	16	17	17A	18	19	20	20A	20B	21	22	23	24	25	26	27	28	29	30	31	32	33	34	35	36	37	38	39	40	41	42	43	44
E. coli IAA+	Leu5_CAA	-	0.00248756	0.00180832	0.00520833	0	0.00171527	0	0.00170068	0.883838	0	0	0	0.00303951	0.00612557	0.00298954	0	0.00437318	0.00430416	-	0.00408719	0	0	0.00133156	-	0.00131926	0.00131926	0.00130378	0.00256739	0	0	0	0.00513479	0.00126904	0.00124688	0.00375469	0.00125156	0	0.00123305	0	0.00118765	0.349687	0.00285442	0.000823045	0.00119873	0.00138994	0.000544685	0.00104415	0.00137506
Misincorporation	Phe_GAA	-	0	0.00271003	0	0	0.00251256	0	0	0.867168	0	0.00210084	0.00188324	0.00186916	0	0.00353357	0	0	0	-	0	0.00169779	0.00168919	-	-	0.00166113	0	0.00164474	0	0	0.00163132	0.00486224	0.00493421	0	0	0.00324675	0	0.00156986	0.00622084	0.00771605	0.0106545	0.5	0	0	0.000686123	0.000958773	0.00123138	0.00113389	0.0168592
	Leu4_TAA	-	0	0	0	0.0031746	0.0031746	0	0	0.832808	0	0	0	0	0.0106383	0	0	0	0	-	0	0.00235849	0.0046729	0.00230947	-	0.00225225	0	0.00668151	0.00220751	0.00873362	0.00217391	0.00218341	0.00215517	0.0021322	0	0.00645161	0	0.00824742	0.0389864	0.00175131	0	0.396262	0.00326531	0.00578871	0.00216375	0.00287278	0.00224612	0.00380487	0.00318752
	Trp_CCA	-	0.0026178	0.000454959	0.00088968	0.00176678	0.00132392	0.00176757	0.00132042	0.904489	0.000434028	0.00211775	0.00280112	0.000791766	0.000776398	0	0.000747384	0	0	-	0.00107488	0.00106914	0.00177242	-	-	0.000353107	0	0.000350631	0.00174764	0	0.00105005	0.000692761	0.00104094	0.000346741	0.000345781	0.00275672	0.000686106	0.0023753	0.00271463	0.000672495	0.00438597	0.178773	0.000967742	0.000303214	0.000890769	0.00100727	0.00591292	0.00315118	0.00228866
	Cys_GCA	-	0	0.000553403	0.00435493	0.00161464	0.00106895	0.00159236	0.00211977	0.920719	0.000978474	0.000935016	0.00261666	0.00696258	0.00172043	0.000424268	0.00126582	0.00127227	-	-	0	0.000418235	0.000838926	-	-	0.000831255	0.00207727	0.002456	0.00203832	0.00325733	0.00162866	0.00121852	0.00121408	0.00323232	0.00284322	0	0.00280561	0.00558214	0.00281124	0.00119617	0.00394011	0.20594	0.000761905	0.00210674	0.000676421	0.000910843	0.00297182	0.00474744	0.00118611
	Ser2_CGA	-	0	0	0.00359712	0	0	0.0034965	0	0.940767	0.00325733	0.00318471	0.003125	0.00310559	0.009375	0	0	0.00309597	-	-	0	0.0030581	0	0	0.00298507	0	0	0.00291545	0.00290698	0	0.0058309	0.00290698	0	0.00288184	0.00578035	0.00578035	0.00576369	0.00569801	0.00285714	0	0.00571429	0.132394	0	0.00257732	0.000471921	0.000917852	0.00366133	0.00136861	0.000458926
	Ser5_GGA	-	0.000490036	0.000530574	0.00248496	0.00130022	0.00116656	0.00129349	0.00168045	0.943314	0.00355375	0.00201258	0.000748036	0.0026003	0.0031816	0.00158479	0.00242512	0.00205165	-	-	0.0028585	0.000830762	0.00106572	0.00199437	0.00244243	0.00220469	0.00149735	0.00388527	0.00194308	0.00103164	0.00319744	0.00147711	0.000455373	0.000791318	0.00180526	0.00169972	0.00147175	0.00282358	0.00416011	0.00224896	0.000563698	0.000677124	0.000562366	0.00357103	0.0023482	0.00178591	0.00511225	0.00122249	0.00408795
	Ser1_TGA	-	0.00118906	0.000877963	0.000436491	0	0.000853242	0.00127605	0.000426076	0.931866	0.00164541	0.00121261	0.00120385	0.00199362	0.00235756	0.00117832	0.00195236	0.00155763	-	-	0	0.000381679	0.00152149	0.000748223	0.0025436	0.000724375	0.00217313	0.00179083	0.00107527	0.00250806	0.000716332	0.000356633	0.00177873	0.000354108	0.000709471	0.00106534	0.00141094	0.000696621	0.00139034	0.000342583	0.00101937	0.211037	0.00032113	0.00119296	0.000602125	0.00129821	0.00221221	0.00446615	0.00141537
	Tyr1_GTA	-	0	0	0	0	0	0	0	0.7625	0.627907	0.00487805	0	0.0037037	0.00359712	0	0.00350877	0.00347222	-	-	0	0	0	0	0	0	0	0	0.00324675	0.00323625	0.00323625	0	0	0	0	0	0.003125	0.0030303	0.0060241	0	0.0058309	0.234848	0	0.0138889	0.0010507	0.00250995	0.00302676	0.00107838	0.00120518
	Tyr2_GTA	-	0	0	0	0	0	0	0	0.760933	0.547753	0	0	0.00395257	0.00388349	0	0	0	-	-	0.00368324	0	0	0.00178891	0.00178891	0.0035461	0.00176367	0	0.00175439	0	0	0	0	0.00171527	0	0	0.00168919	0.00167224	0.00499168	0.00165289	0.00652528	0.244048	0	0.00399202	0.000644351	0.0024481	0.00298612	0.00110998	0.00158343
	Val2A_GAC	-	0	0.00150927	0.0025047	0.00434603	0.00227273	0.00162966	0.00283286	0.37163	0.00159236	0.00254802	0.00135109	0.00134875	0.00038373	0.000948947	0.000189072	0.000567752	0.000941442	-	0.000364697	0.000543675	0.00145112	0.000178923	-	0.000528076	0.00157784	0.000881057	0.00192577	0.00104913	0.000875197	0.00104675	0.00139421	0.000869868	0.0010404	0.000693602	0.000865951	0.0032889	0.00103717	0.00173974	0.000859697	0.000684112	0.00375811	0.00390691	0.00408302	0.00461854	0.00135478	0.00270225	0.000844024
	Val2B_GAC	-	0.000248139	0.001499	0.00177276	0.00336108	0.00127714	0.000944138	0	0.847708	0.000760919	0.0027088	0.00074228	0.00325685	0.000441566	0.000439496	0.000291843	0.00102354	0.000436681	-	0	0.000283527	0.00127551	0.000981767	-	0.000692521	0.000827472	0.000969798	0.00399174	0.000823497	0.000274537	0.00164294	0.000822143	0.000410004	0.00122549	0.000408163	0.00108696	0.00298994	0.000814996	0.000683807	0.00243112	0.000806668	0.00456315	0.00253807	0.00362076	0.00470683	0.00186592	0.0015983	0.00252626
	Val1_TAC	-	0.000892813	0.00122386	0.0011402	0.00284967	0.000679309	0.000592451	0.000704752	0.910361	0.00101519	0.00211176	0.00117708	0.00333329	0.00158075	0.000666036	0.00203755	0.00209291	0.00176252	-	0.00073905	0.00270577	0.00208441	-	-	0.00110017	0.000985649	0.000801693	0.00233296	0.00122926	0.00103349	0.0009913	0.000808407	0.000828043	0.000860462	0.000820152	0.000898636	0.00043036	0.0014735	0.000898367	0.00151778	0.000515924	0.000806177	0.00233223	0.00283308	0.000989082	0.00181934	0.00232846	0.00130091
	Gly1_CCC	-	0.000670017	0.00363027	0.00294511	0.0045285	0.0053234	0.00264271	0.000525348	0.813386	0	0.00279472	0.00524214	0.00394186	0.00073278	0.00144439	0.000961538	0.0031093	-	-	0.00119503	0.0030945	0.00355703	-	-	0.00141844	0.000940071	0.00070555	0.000469263	0.000932836	0.00255755	0.00140482	0.00139795	0.000700771	0.00255102	0.000691563	0.00622263	0.00207373	0.000922297	0.00162715	0.0025057	0.00159562	0.000455685	0.00181571	0.000909504	0.00390266	0.00112943	0.00404585	0.000223914
	Gly3_GCC	-	0.000615592	0.00214154	0.00355119	0.00302048	0.00282774	0.00119059	0.000701864	0.166076	0.000815736	0.00285434	0.00120731	0.00331248	0.000973266	0.000577604	0.000378089	0.00168529	0.000725262	-	0.000532734	0.00130108	0.00239946	-	-	0.000763762	0.000877462	0.000804329	0.00265771	0.00107916	0.000467426	0.00152505	0.00111776	0.00141253	0.00114651	0.00093206	0.00107887	0.00365074	0.00355556	0.0019819	0.00197349	0.000742062	0.000884817	0.0028235	0.00488069	0.00489699	0.00143464	0.00197291	0.00153692
	Gly2_TCC	-	0.00143988	0.00239856	0.00439981	0.00504378	0.00379903	0.0531099	0.000943752	0.0266192	0.00268593	0.00220062	0.00501367	0.0053348	0.00455316	0.000975437	0.000795897	0.00432023	-	-	0.0034431	0.00291211	0.00184453	0.00517771	-	0.00122656	0.00296529	0.00165146	0.000783426	0.000868583	0.00164445	0.000876271	0.000778951	0.000692161	0.00353631	0.00163553	0.00146048	0.000944125	0.00574861	0.00237308	0.0023345	0.000829463	0.000912106	0.00248365	0.00123967	0.00398506	0.000740436	0.00123609	0.00336866
	Ala2_GGC	-	0.00103257	0.000847874	0.00128284	0.00145304	0.00105365	0.000915791	0.000521376	0.869343	0.000631978	0.00213006	0.000993336	0.00367465	0.0016815	0.000653008	0.00146873	0.00200352	0.0027667	-	0.000686785	0.00258544	0.00205728	-	-	0.0011354	0.00201118	0.000843306	0.00204573	0.00135951	0.00259047	0.00135853	0.00264127	0.00411375	0.00182757	0.00106931	0.000755978	0.00380183	0.00411979	0.0026179	0.00130337	0.000787929	0.00447673	0.00195634	0.00117233	0.000550444	0.000625856	0.0017104	0.000778392
	Ala1B_TGC	-	0.00136197	0.00103521	0.0012862	0.00166222	0.000880479	0.000583851	0.000308008	0.916252	0.000940175	0.00179877	0.00121355	0.00432119	0.00121809	0.000526274	0.0017526	0.00180312	0.00217271	-	0.000804734	0.00271503	0.00272668	-	-	0.00101117	0.00155558	0.000814932	0.00212004	0.001202	0.00442044	0.00104459	0.000980942	0.00179039	0.00198786	0.000636221	0.00197564	0.00133983	0.00844214	0.00147108	0.00154288	0.00082158	0.00152852	0.00219461	0.000966724	0.000909146	0.00261136	0.00220135	0.000528589
	Asp_GTC	-	0.000887264	0.00127149	0.00119779	0.00139563	0.00168449	0.00196439	0.00274958	0.441715	0.000849053	0.00276536	0.00357199	0.00273617	0.00133835	0.000807246	0.00169606	0.00212005	0.00139149	-	0.000455741	0.000526107	0.000912281	0.000557058	-	0.000699782	0.00137038	0.000961197	0.000721501	0.00257119	0.000695188	0.000945589	0.00134691	0.00181955	0.00407214	0.00147368	0.000944642	0.00161926	0.0038435	0.00355573	0.00120967	0.00121246	0.00104105	0.00102866	0.00133236	0.00150959	0.00147944	0.00221305	0.00171359
	Glu_TTC	-	0.00118986	0.0024725	0.00160941	0.00131745	0.00142143	0.00149754	0.000840906	0.0995453	0.00131491	0.00273798	0.00428832	0.000793735	0.00211859	0.00104346	0.00161715	0.0145994	-	-	0.0026419	0.00386271	0.00181314	0.000986117	0.00209102	0.000669516	0.00262568	0.00183572	0.000567918	0.000821883	0.000838244	0.00116769	0.00147264	0.0033362	0.00111454	0.00109778	0.00106383	0.00133906	0.0634712	0.00251077	0.00124628	0.00157783	0.00144708	0.00209983	0.00368659	0.00122134	0.00291096	0.00231236	0.00345488
	Leu1(P)_CAG	-	0.000906481	0.00146499	0.00160589	0.00122514	0.000376152	0.00177008	0.00381644	0.0841832	0.00452405	0.00312672	0.00110031	0.00182299	0.00246283	0.000642674	9.05e-05	0.000450369	0.000805441	-	0.00111111	0.000682536	0.0015107	0.00049867	-	0.00255081	0.00106776	0.00155419	0.00121487	0.000810045	0.00307493	0.00104932	0.00266387	0.000887741	0.000724463	0.00112504	0.00377844	0.00249417	0.00168081	0.040747	0	0.449308	0.00055915	0.000630766	0.0013875	0.000539707	0.000461503	0.00206881	0.0044285
	Leu1_CAG	-	0.000370084	0.00132979	0.00170382	0.00103584	0.000598172	0.00222472	0.00415911	0.0647196	0.00334887	0.00396562	0.00180401	0.00225445	0.00263426	0.00100717	0.000416435	0.000374887	0.0004117	-	0.00101137	0.000934579	0.00204491	0.000748749	-	0.00381624	0.000650524	0.00100837	0.001841	0.00109014	0.00357149	0.000961932	0.00268966	0.000605596	0.00138423	0.000868671	0.00420369	0.00233906	0.0016059	0.0380903	0.000140635	0.444926	0.000722314	0.000279047	0.000835379	0.00104009	0.000678369	0.0037891	0.00377301
	Leu2_GAG	-	0.0003314	0.00078637	0.00228775	0.00138941	0.000635001	0.00226102	0.00312695	0.205096	0.00234655	0.0044226	0.00353961	0.00255412	0.00279262	0.000969815	0.000239292	0	0.000236574	-	0.00122768	0.000891365	0.00164799	0.000434641	-	0.00204038	0.000428633	0.000747384	0.000743021	0.0010591	0.00349354	0.00126716	0.00179514	0.000522739	0.000725163	0.000617411	0.00205846	0.00267572	0.000923456	0.0592215	0	0.45092	0.000101502	0.000201877	0.00266588	0.00255403	0.00107769	0.00578091	0.00428182
	Leu3_TAG	-	0.000220799	0.00135754	0.000983607	0.00147059	0.000652316	0.000653275	0.00146175	0.899774	0.00268732	0.00109273	0.000309885	0.00107626	0.00186509	0.000460264	0	0.000453789	0.000149544	-	0.00126422	0.000140135	0.000415743	0.000689655	-	0.00164587	0.000684838	0.000683807	0.00189805	0.000135391	0.000135851	0.000405405	0.000539811	0.000134571	0.000268492	0.000407111	0.00108313	0.00106809	0.0125728	0.00434382	0.000502197	0.540919	0.000740375	0	0.000582343	0.0025525	0.00150358	0.00324638	0.000694525
	Arg2_ACG	-	9e-05	0.00023663	0	7.64e-05	7.61e-05	0.000302755	0.0003003	0.735225	0.000292569	0.000486044	0.000329641	0.00116853	0.000576332	0.000189036	0.00043824	0.00012518	0.000430531	-	0.00012147	0.000181807	0.000182471	0.000300048	-	0.000355703	5.89e-05	0.000294933	0.000412031	0.000465224	0.000174571	0.000230216	0.000402924	0.000516085	0.000229489	0.000230534	0.0121135	0.000453489	0.995454	0.00117221	0.00245442	0.000242636	0.000964274	0.000237417	0.000512821	0.000510939	0.000560381	0.000697382	0.000460278
	Arg3_CCG	-	0	0.00191022	0	0.00365297	0.00181324	0.000899281	0.00266193	0.913198	0.000868056	0	0.00153846	0.00151745	0.000748503	0.000738552	0.00220751	0	0.00145879	-	0.000727273	0	0	0.00071736	-	0.000709723	0.00142146	0	0.000713267	0	0.00212314	0	0.00211864	0.00141844	0.00211566	0.000706714	0.13338	0.000694927	0.00198807	0	0.00442695	0.359252	0	0.000462107	0.00339559	0.000674309	0.00433622	0.00527531	0.00198151
	Pro1_CGG	-	0.000640615	0.000129232	0.000379891	0.000378836	0.00037679	0	0.000501945	0.899093	0.000927859	0.000460035	0.00102681	0.000453772	0.000566701	0	0.000561987	0.000112246	0.000223889	0	0.000667631	0.000668375	0.000555062	-	-	0.000443459	0.000330688	0.000330251	0.000660066	0.000438933	0.000110035	0.000328443	0.000876232	0.000328875	0.000109087	0.000435208	0.00108814	0.000327261	0.00247658	0.00955008	0.000210659	0.912378	0	0.000204687	0.00627829	0.0101032	0.000423334	0.0105099	0.00265587
	Pro2_GGG	-	0.00238379	0.000365497	0.000544366	0.000180571	0.00053986	0.00107354	0.00106933	0.829564	0.00105783	0.00173611	0.00135662	0.000843313	0.000845309	0.000336304	0.00100435	0.000503018	0.000335458	0.0015	0.000665004	0.00133067	0.00116086	-	-	0.000993542	0.000659522	0.000658979	0.00180832	0.00065757	0.000494153	0.000658003	0.000494071	0.000984413	0.00131363	0.000163988	0.00230036	0.00147011	0.00146057	0.000325098	0.00130442	0.410665	0.000321079	0.000160026	0.001381	0.00183823	0.00168119	0.00152788	0.00137699
	Pro3_TGG	-	0	8.17e-05	0	0.000160295	0.000318801	0	0.000636082	0.913536	0.000235627	0.000229516	0.00036361	0.00028931	0.000144519	7.19e-05	0.000572533	0.00014298	0.000785714	0.000497512	0.000282346	0.000564613	0.000633937	-	-	0.000351568	0.00028023	0.000349406	0.000418585	0.000208972	0.000698763	0.000208928	0.000277604	0.000693577	0	6.94e-05	0.00188298	0.000347078	0.000891877	0.0200753	0.000451642	0.916112	0.000190561	0.000187876	0.00113669	0.00147757	0.00282135	0.00312421	0.00140584
	Gln2_CTG	-	0.00118597	0.00192955	0.00165442	0.00261147	0.00274858	0.000528364	0.000479754	0.946377	0.000837716	0.0040131	0.00110757	0.00119816	0.00147079	0.000642526	0.0013265	0.0019704	-	-	0.00227128	0.00113291	0.00094821	-	-	0.000947354	0.000990857	0.00282537	0.00300516	0.00103297	0.000901266	0.000940523	0.000850454	0.000982977	0.00112552	0.00054338	0.00462443	0.0011125	0.00066569	0.00494335	0.00424954	0.000795932	0.00162068	0.000481022	0.000832202	0.00108923	0.0019193	0.00536783	0.00104257
	His_GTG	0.000993816	0.000724138	0.00163237	0.00182581	0.00181867	0.0015125	0.000768614	0.000333056	0.936131	0.000711928	0.00115707	0.000988489	0.00305023	0.00082037	0.000659776	0.000375846	0.000843935	0.000249012	-	0.000551775	0.00140871	0.00209911	-	-	0.000758334	0.00133152	0.000485216	0.00460802	0.0007242	0.00102834	0.000814111	0.00129495	0.00301432	0.000813082	0.000636152	0.00189822	0.00375794	0.00300972	0.00488556	0.0046173	0.00103544	0.000942479	0.000677367	0.000849817	0.000849468	0.000585052	0.00251176	0.00306632
	Gln1_TTG	-	0.0020631	0.00264569	0.001162	0.003327	0.00291091	0.000876779	0.000403633	0.925119	0.00167235	0.00329072	0.00101189	0.00132467	0.00195104	0.000940321	0.000437281	0.00169205	-	-	0.00167577	0.00105328	0.000123434	-	-	0.000800345	0.00061361	0.00305698	0.00287462	0.00122377	0.000736467	0.00213168	0.0027989	0.00139614	0.00267656	0.00343664	0.00194837	0.000661734	0.0463607	0.00426384	0.0051839	0.00455526	0.00156036	0.000988189	0.00366146	0.00328269	0.00300005	0.00473261	0.00177537
	fMet1_CAT	-	0.00559693	0.00139608	0.00253506	0.00267288	0.00552804	0.00201461	0.00163361	0.815554	0.00136469	0.00262407	0.00210567	0.00217976	0.00104886	0.000556	0.00277773	0.00139039	0.00122988	0.00186348	0.00211853	0.0026372	0.00204622	-	-	0.000429487	0.00176056	0.000870604	0.00247759	0.000920261	0.00261718	0.00280702	0.00114364	0.0015633	0.000698288	0.00235014	0.0027941	0.0017267	0.00133064	0.000851405	0.00453767	0.000548337	0.000480331	0.000896429	0.000780874	0.00116075	0.00148861	0.00053226	0.000482008
	fMet2_CAT	-	0.00714286	0.00294985	0.00289017	0	0	0.00288184	0	0.733524	0	0	0.00278552	0	0	0	0.00257069	0	0.00257732	0.00259067	0	0	0	-	-	0	0	0	0.00257732	0	0	0.00512821	0	0.00255102	0	0	0	0	0.00246914	0.00242718	0.00963855	0	0	0.00241546	0.00242131	0	0.00240385	0.00243309	0
	Ile2_CAT	-	0	0.00699301	0	0.00680272	0	0	0	0.604027	0	0	0	0.0049505	0	0	0.00473934	0	-	-	0	0.00465116	0	0	-	0	0	0	0.00429184	0	0.00425532	0.00423729	0.004329	0.00423729	0	0	0	0	0.595238	0	0.00185254	0.00260856	0.00180914	0.00134388	0.002526	0.000889812	0.00103858	0.00252563	0.00059268
	Met_CAT	-	0.000219419	8.46e-05	0.000669568	0.00041425	0.000247321	0.000492773	0.00138583	0.890663	0.000242385	0.000711575	7.68e-05	0.00145327	0.000455546	7.54e-05	0.000300481	0.000300729	0.00022477	-	0	0.0002197	0.000438661	0.000723118	-	0.000572697	0.000570858	0.000357551	0.000713674	0.000782028	0.000284779	0.00113186	0.00042653	0.000994389	0.000562153	0.000421615	0.00126263	0.000280525	0.00230174	0.000558191	0.000416146	0.00110688	0.000207197	0.000547945	0.00061333	0.000342044	0.00210483	0.000674172	0.000269742
	Ile1_GAT	-	0.0014201	0.000574218	0.00101004	0.00168009	0.00344191	0.00395815	0.00275388	0.0226252	0.000752307	0.00286896	0.00121664	0.00412462	0.00119516	0.000800761	0.00192931	0.001676	0.00214421	-	0.00032982	0.00043345	0.00113543	0.00096372	-	0.00046989	0.000761615	0.000631054	0.00165879	0.00124271	0.00391561	0.00125513	0.000524751	0.000887557	0.00112417	0.000905704	0.00166249	0.00173197	0.00204912	0.000940983	0.00132539	0.0018426	0.000547125	0.000614189	0.00310995	0.00412678	0.00380553	0.00113609	0.00334925
	Arg5_CCT	-	0	0.00104384	0.00305188	0.00199601	0.000997009	0.00198413	0	0.870461	0	0.000931099	0.00552486	0.0018315	0.000909091	0.000904159	0.000904977	0.00270514	-	-	0.00179695	0.000896057	0	0	-	0	0.00439367	0.000878735	0.000877193	0.000874126	0.000874126	0.00263389	0.00529567	0	0.00174825	0.00086881	0.151173	0	0.00169205	0.00215672	0.0021398	0.00284495	0.00142349	0	0.00487805	0.00281096	0.00348432	0.00559441	0
	Ser3_GCT	-	0.000407332	0.00146413	0.00222434	0.00204563	0.00109204	0.00217324	0.00524368	0.878368	0.0046428	0.00310467	0.00102474	0.00187536	0.00637213	0.00266854	0.0047255	0.0129985	-	-	0.00299483	0.00269034	0.00107023	0.00274905	0.0038506	0.00254453	0.00100705	0.00335154	0.00309751	0.00258748	0.00782396	0.00146359	0.00270038	0.00133027	0.00121021	0.0009656	0.132717	0.000952041	0.00262078	0.00142045	0.00118332	0.00271924	0.00182868	0.00348104	0.00420797	0.000655063	0.000750821	0.00474022	0.00239565
	Arg4_TCT	-	0	0.00215827	0.000698324	0.000694444	0.000692042	0.00275862	0	0.919808	0.00130293	0.00318269	0.000621118	0.00246914	0.00121655	0.00120192	0.000595593	0.00298507	0.0029036	-	0.00171527	0.00226629	0.000569801	0.00224215	-	0.00110132	0.00164745	0.00220143	0.00274424	0.000544366	0	0.00108637	0	0.00161117	0.00216099	0.00161551	0.0785146	0.00156986	0.00348086	0.00291015	0.00106648	0.00105895	0.000699056	0.003125	0.00207972	0.000690608	0.00206612	0.00411664	0.00241963
	Thr2_CGT	-	0.000667913	0.00132116	0.000698162	0.00127094	0.000462374	0.000690926	0.000680812	0.945671	0.000330688	0.00240516	0.00173066	0.00378993	0.000858093	0.00064178	0.000532708	0.00117547	0.00117021	-	0.000520291	0.0021791	0.0023753	-	-	0.000618748	0.000922698	0.00061684	0.0025641	0.00081616	0.000510934	0.00264604	0.00172958	0.00162519	0.00111235	0.000811935	0.00496253	0.00141186	0.00170392	0.00188417	0.00148207	0.0022743	0.000195676	0.00145405	0.0018361	0.00154829	0.00211987	0.000483185	0.000867972
	Thr1_GGT	-	0.000393422	0.000761132	0.00141756	0.000793021	0.000488132	0.000424551	0.000240168	0.88397	0.00163494	0.00255058	0.000863807	0.00333372	0.00114149	0.000567827	0.00022627	0.000904824	0.000563698	-	0.000387125	0.00066291	0.00148531	-	-	0.000658617	0.000875465	0.000603004	0.00169966	0.0016951	0.00277929	0.00114554	0.000599553	0.000817082	0.000818152	0.00070434	0.00143512	0.00390174	0.000923461	0.00048913	0.000379919	0.00662573	0.000264131	0.000418958	0.00275511	0.00405764	0.00384496	0.00139319	0.00180673
	Thr3_GGT	-	0.000367945	0.000677256	0.00156288	0.00130758	0.000534664	0.00478808	0.000931478	0.0934985	0.000690171	0.00326891	0.000913711	0.00297636	0.00142223	0.000340329	0.000621469	0.00113225	0.000676247	-	0.000610704	0.00105438	0.00265193	-	-	0.000717598	0.000604462	0.000879894	0.00225523	0.0013163	0.00547166	0.000930844	0.000273508	0.000984952	0.000657534	0.000926683	0.00126694	0.00538817	0.000816816	0.000763109	0.000489796	0.00531165	0.000319523	0.000423124	0.00235664	0.00450852	0.00392958	0.00114715	0.00109461
	Thr4_TGT	-	0.000884956	0.00155934	0.00230622	0.000671066	0.000446877	0.00072379	0.000658292	0.928669	0.000700318	0.0015401	0.00125945	0.00393102	0.000882475	0.000979836	0.00242231	0.00190173	0.00260024	-	0.00157313	0.00329398	0.00176902	-	-	0.000555079	0.000956071	0.000754072	0.00195744	0.00110005	0.0005003	0.000848388	0.000896013	0.00144386	0.000348155	0.000598265	0.00118947	0.000737318	0.00137302	0.00124069	0.00231449	0.00141469	0.00069722	0.000878085	0.00101015	0.000507427	0.0025681	0.00498742	0.00114296
	Asn_GTT	-	0.000451406	0.000491872	0.00141047	0.00483125	0.00128473	0.00162349	0.000913242	0.867764	0.000928568	0.00144818	0.00469215	0.00286126	0.00113053	0.000773495	0.00186503	0.00211715	0.00196108	-	0.00207179	0.00399493	0.00193831	-	-	0.000883467	0.00196566	0.000545371	0.000815712	0.000936602	0.00333604	0.00439083	0.00097882	0.003	0.00202679	0.000689396	0.00134467	0.00275448	0.00230221	0.00157522	0.00209259	0.00200555	0.000799735	0.00125969	0.000734512	0.00102592	0.00127379	0.00371497	0.000810858
	Lys_TTT	-	0.000804451	0.000856114	0.000847532	0.00203583	0.0012683	0.00139609	0.000738196	0.786827	0.000928987	0.00178772	0.00102327	0.00272458	0.00067375	0.00048852	0.000280791	0.0012022	0.000557315	-	0.000586553	0.000975467	0.00167204	-	-	0.000968476	0.000984512	0.000626325	0.00148999	0.000694544	0.000721761	0.00403418	0.00294851	0.00249508	0.00099486	0.0017301	0.0015544	0.00193618	0.0174033	0.00107701	0.0011533	0.00176839	0.000692409	0.000905903	0.00139351	0.000420668	0.000508042	0.00239829	0.00263078
Figure 3-figure supplement 1B	Species	-1	1	2	3	4	5	6	7	8	9	10	11	12	13	14	15	16	17	17A	18	19	20	20A	20B	21	22	23	24	25	26	27	28	29	30	31	32	33	34	35	36	37	38	39	40	41	42	43	44
E. coli IAA-	Leu5_CAA	-	0	0	0.00103627	0	0	0.00102354	0.00406504	0.10233	0.00200401	0.000967118	0.00192493	0	0.00489237	0.00287632	0.000951475	0.00094697	0	-	0	0	0.00181324	0.00270758	-	0.00179051	0.000897666	0.0026738	0.00266904	0.00266904	0.00177148	0.00176523	0	0.000882613	0.00174825	0	0	0.000874891	0.00259291	0.000858369	0.00169062	0.332839	0	0.000595948	0.000539197	0.00150132	0.000350703	0.000728757	0.000814498
Misincorporation	Phe_GAA	-	0.00159744	0.00105708	0.00103093	0.0020429	0.00101215	0.00101523	0.00203459	0.0864322	0	0.00292969	0	0.00191022	0	0.000938967	0	0.000932836	0.00372787	-	0	0.00091659	0.000914077	-	-	0	0.000910747	0.000914077	0	0	0.000914077	0.0018315	0	0.000927644	0.000914913	0.00185357	0	0.00181818	0	0.003663	0.00537153	0.505647	0.00126823	0.00144023	0.000322467	0.000574655	0.000724545	0.000807926	0.0130096
	Leu4_TAA	-	0.00321543	0	0	0.0020284	0	0	0.00404858	0.108652	0.00387597	0	0.0018797	0	0	0	0	0.00185529	0.00182482	-	0	0	0.00350263	0	-	0.00519031	0	0	0.00170648	0.00337838	0.00169491	0.00168067	0.0033841	0	0	0.00169779	0	0	0.00827815	0	0.00274725	0.360884	0	0.00125235	0.000648677	0.000807068	0.00147967	0.00147854	0.000674394
	Trp_CCA	-	0.00108519	0.000281849	0	0	0.00193584	0.00138504	0.00495595	0.0981039	0.000544366	0.00236035	0.00131165	0.000781861	0.00103013	0.00049505	0.00024325	0.000233263	0.000229253	-	0.00202338	0.00112158	0.000896057	-	-	0.000224065	0.000671592	0.000447828	0.00111657	0.000446628	0.000223065	0.000445831	0.000668598	0.0006683	0.000447127	0.000445434	0.00155902	0.00222321	0.00200222	0.00199512	0.0043985	0.198952	0.000210881	0.000593589	0.000416378	0.000517447	0.001232	0.00060469	0.00132106
	Cys_GCA	-	0.00071582	0.000664452	0.0029615	0.00230112	0.00130976	0.000978155	0	0.0748784	0.00192308	0	0.00215783	0.0124378	0.00338566	0.00091047	0.000604047	0.00120773	-	-	0.00060042	0.00029985	0.0018056	-	-	0.00060042	0	0.000888362	0.0011782	0.000295683	0.000593472	0.000296912	0.00177305	0.000295421	0.000297265	0.000891795	0.000589102	0.00118765	0.00208706	0.00179051	0.00176574	0.192859	0.00028082	0.000514271	0.000548905	0.000643955	0.000973831	0.000848984	0.000579242
	Ser2_CGA	-	0	0	0	0	0.00204499	0.00407332	0	0.0995935	0.0100604	0.00199601	0	0	0	0	0	0.00196464	-	-	0.00194553	0.00194553	0	0.00194175	0.00191571	0.00191939	0	0.00188324	0	0	0	0.00189394	0.00188324	0.00187617	0	0	0	0.00188324	0.00556586	0.00185185	0.00184162	0.136612	0	0	0.000293945	0.000287274	0.00257658	0.00228833	0.000287191
	Ser5_GGA	-	0.000512558	0.000590468	0.00117351	0.000752005	0.00158664	0.00141749	0.00524781	0.106559	0.0102049	0.000971817	0.000805932	0.00161031	0.000800256	0.000960846	0.00135599	7.96e-05	-	-	0.0019835	0.0010297	0.000790826	0.00125974	0.00179997	0.00117096	0.00100955	0.00217071	0.00147355	0.00108924	0.00123954	0.000927429	0.000619195	0.000924072	0.000999539	0.0010051	0.000693749	0.00115536	0.00245248	0.00130478	0.001001	0.000693695	0.000693428	0.00389968	0.00107214	0.00427808	0.000532765	0.0015972	0.000606934
	Ser1_TGA	-	0.000926498	0.000454545	0.000227221	0.000450857	0.000224065	0.000446229	0.00826446	0.0693796	0.00375442	0.00263678	0.00109697	0.000879314	0.00130976	0.000656168	0.00217344	0.00152406	-	-	0.000647249	0.000646273	0.000215008	0.000212495	0.00126369	0.000627615	0.00062513	0.00104015	0.000832466	0.000414852	0.000623441	0.00124249	0.0012443	0.000206612	0.000827815	0.000827815	0.00103349	0.000206186	0.00123482	0.000817661	0.00245148	0.22283	0.000197316	0.000730861	0.000464265	0.000822587	0.00108374	0.000713832	0.00110795
	Tyr1_GTA	-	0.0027972	0.00100402	0	0	0.00195695	0.00195122	0.00683594	0.0310982	0.0527831	0.0018315	0	0.000887311	0.000884956	0.00178253	0.000884173	0.00176835	-	-	0.00264085	0.00176212	0	0.0008726	0.00087108	0	0	0	0.00430663	0	0.000874891	0	0.000864304	0	0	0.000869565	0	0	0.00171821	0.000857633	0.0033841	0.279872	0.00075358	0	0.000557495	0.000263189	0.000622367	0.000596815	0.000930033
	Tyr2_GTA	-	0.00208333	0.000733676	0.00144196	0.000720981	0.00143575	0.000715308	0.0121429	0.0435714	0.0392432	0.000672948	0.00195058	0.000650195	0.000647668	0.00130208	0.00258398	0.00322581	-	-	0	0.0032113	0.00192678	0.000638978	0.00317662	0.00189633	0.00126422	0	0.00126743	0	0.000635728	0	0.000635728	0	0.000630517	0.00126582	0.000628536	0.000628141	0.00125313	0.00125	0.00311333	0.283086	0	0	0.000511621	0.000594691	0.000594627	0.000935134	0.00100631
	Val2A_GAC	-	0.00127146	0.00208033	0.000630418	0.000629624	0.000785053	0.00202808	0.0020224	0.0495433	0.000307456	0.0025742	0.00120555	0.000601504	0.000299805	0.000593384	0.00014771	0.00132861	0.000294334	-	0.000286985	0.000286328	0.000857756	0.000995308	-	0.000564254	0.00126814	0.000706914	0.000564254	0.000846382	0.00099108	0.00113042	0.000424328	0.000987167	0.00056101	0.000841161	0.000140252	0.00055991	0.00168232	0.000843407	0.00139198	0.00013885	0.000555787	0.000552334	0.00069377	0.00111576	0.0002759	0.000690417	0.000690799
	Val2B_GAC	-	0.000664231	0.000882807	0.000870227	0.000759384	0.000772542	0.00108061	0.000536308	0.0947436	0.00190235	0.0023136	0.00083682	0.00114835	0.000936817	0.000412031	0.000512821	0.00092374	0.000511614	-	0.000502968	0.000201005	0.00130653	0.00040044	-	0.000597253	0.00109203	0.000298954	0.000397022	0.00109366	0.000298329	0.000894543	0.000796892	0.000298033	0.000296971	0.000396275	0.00029656	0.00019757	0.00108825	0.00129148	0.00127902	0.000590087	0.000294956	0.000390969	0.0004901	0.000393895	0.000782243	0.000879593	0.00136933
	Val1_TAC	-	0.000562454	0.000806921	0.000597478	0.000932262	0.000892401	0.000660859	0.000491159	0.0802014	0.00123297	0.00333616	0.000688767	0.000589812	0.00108489	0.000565546	0.00162567	0.00169366	0.00155474	-	0.000843163	0.000773718	0.00145273	-	-	0.000709021	0.000747391	0.000486791	0.000755668	0.000790637	0.000616989	0.000816596	0.000651421	0.000638905	0.000563776	0.00055479	0.000607043	0.000425928	0.0012079	0.000893361	0.00113803	0.00048964	0.000481464	0.000950473	0.000912354	0.000536137	0.00107269	0.000934275	0.000753734
	Gly1_CCC	-	0.000435635	0.000360101	0.00159405	0.000882457	0.00176087	0.00228793	0.00332575	0.0848908	0.000863558	0.00114867	0.000982318	0.00130314	0.00128949	0.000623053	0.000622181	0	-	-	0.000772798	0.00154393	0.00153965	-	-	0.000154297	0.000769941	0.000617093	0	0.000768049	0.00276116	0.000925497	0.000461681	0.0013947	0.000461396	0.000306937	0.00169101	0.000769112	0.00108041	0.00124825	0.000917431	0.000458645	0.000457457	0.000152509	0.000761151	0.000775314	0.000304599	0.000608088	0.000151538
	Gly3_GCC	-	0.000500629	0.00213306	0.00100626	0.000969456	0.000852525	0.00110826	0.00065136	0.0191471	0.000818001	0.001793	0.000608377	0.000877375	0.00064179	0.000331307	0.000238807	0.00144728	0.000658814	-	0.000504405	0.000661168	0.00233846	-	-	0.000358154	0.000380126	0.00049184	0.000424453	0.000693598	0.000459379	0.0011849	0.000648595	0.000939743	0.000536427	0.000478901	0.000482339	0.000761112	0.00158401	0.00143002	0.00122678	0.000467409	0.000566875	0.000532653	0.000535207	0.000567865	0.000823109	0.000741429	0.000863462
	Gly2_TCC	-	0.000960154	0.00180518	0.0015804	0.00105201	0.00118056	0.0527418	0.00058889	0.00397783	0.00109983	0.00167235	0.0011557	0.00622972	0.000764672	0.00100768	0.000627904	0.000500469	-	-	0.000813059	0.000874017	0.00130589	0.000808458	-	0.000806202	0.000308871	0.000369617	0.000616789	0.00080148	0.000739144	0.000685486	0.000308566	0.000493523	0.000430081	0.000674474	0.000491039	0.000613911	0.00509891	0.00134614	0.00133463	0.000181203	0.000845564	0.00066357	0.000721935	0.000544333	0.000541451	0.000301078	0.000300806
	Ala2_GGC	-	0.0011253	0.000493097	0.000635342	0.00144229	0.000604438	0.00091991	0.000688705	0.137351	0.00200401	0.00202344	0.000809626	0.000418107	0.00116534	0.000772073	0.00134949	0.00170578	0.00215277	-	0.00059695	0.000842048	0.00155014	-	-	0.000737786	0.000488149	0.000488918	0.000271577	0.00138339	0.000866317	0.000542859	0.000763088	0.000680476	0.000352571	0.000757883	0.000734814	0.000353088	0.00146839	0.00119904	0.00135512	0.000568597	0.000514863	0.000809826	0.000998758	0.000513958	0.000433534	0.000512033	0.000405121
	Ala1B_TGC	-	0.00115399	0.000744306	0.000548747	0.00106459	0.000768826	0.000807697	0.000594315	0.124729	0.00163827	0.00204697	0.000688644	0.000629067	0.00102664	0.000574008	0.00154539	0.00177632	0.00180682	-	0.000669306	0.000698491	0.001418	-	-	0.000702065	0.000708141	0.000449215	0.000307669	0.000735442	0.00132672	0.000688903	0.00061151	0.000372763	0.000400427	0.00056198	0.00102536	0.000951521	0.00120336	0.000887015	0.00126756	0.000589174	0.00126167	0.000929977	0.000871138	0.000455975	0.000494339	0.000531289	0.000418152
	Asp_GTC	-	0.000917582	0.00103455	0.000761191	0.000834076	0.000968732	0.00130163	0.0014993	0.0440149	0.000638724	0.00115642	0.000713574	0.000626385	0.00120971	0.00059487	0.000633185	0.00167191	0.00114242	-	0.000288556	0.000402622	0.000790862	0.000515159	-	0.000376824	0.000563939	0.000527637	0.00118062	0.000300915	0.000520284	0.000534872	0.000694602	0.000609027	0.000759113	0.00117239	0.000686813	0.000645883	0.00310561	0.00120621	0.00082468	0.00110495	0.00076002	0.000893302	0.000976461	0.000942176	0.000676862	0.000453737	0.000491166
	Glu_TTC	-	0.00101462	0.00127071	0.00125031	0.000893315	0.000988582	0.000640689	0.000622879	0.00759946	0.000570153	0.00225273	0.000824296	0.000856566	0.000998647	0.000465355	0.00115605	0.0158308	-	-	0.00045077	0.000640143	0.00160059	0.000674872	0.0023546	0.000479371	0.000719114	0.000641952	0.000336549	0.000463288	0.000527738	0.000527072	0.00102516	0.000955444	0.000749661	0.00072395	0.000479218	0.000860064	0.0112907	0.000433554	0.000629089	0.00132894	0.00096944	0.000477886	0.000793392	0.000754729	0.000982937	0.000553412	0.000643737
	Leu1(P)_CAG	-	0.000570668	0.00109917	0.00101992	0.00047887	0.00083627	0.000714541	0.00107054	0.007301	0.00142113	0.00200934	0.00135661	0.000588859	0.00112101	0.00053365	0.000176439	0.000293049	0.00040833	-	0.000958016	0.000619474	0.00133846	0.000610704	-	0.00160301	0.000386655	0.000772243	0.000606462	0.000606729	0.00115824	0.000605827	0.000220204	0.00033087	0.00049437	0.000658942	0.000771477	0.00121252	0.000876568	0.0387464	0.000327708	0.452118	0.000878445	0.000271783	0.000374692	0.000643328	0.000533618	0.000318894	0.000265858
	Leu1_CAG	-	0.000443794	0.00123038	0.00119241	0.000700182	0.000600483	0.000821098	0.0014467	0.00553367	0.0016752	0.0020044	0.00124133	0.000826515	0.00136735	0.000594752	0.000467585	0.000712964	0.000409288	-	0.000828032	0.000748248	0.00152383	0.000571162	-	0.0018884	0.000465008	0.000993266	0.000864371	0.000593235	0.00194756	0.000502066	0.000347687	0.000322273	0.00064222	0.000590387	0.000604727	0.000849027	0.00101164	0.0395893	0.00021715	0.45234	0.000639108	0.000241617	0.000425069	0.000312797	0.000373841	0.00118572	0.000322781
	Leu2_GAG	-	0.000669942	0.00185989	0.00105097	0.000784724	0.000612906	0.000868131	0.00425052	0.0181976	0.00292675	0.00248224	0.000853534	0.00127932	0.000940091	0.000170503	0.00025495	0.000254001	0.000420805	-	0.000643656	0.000882896	0.00103734	0.00087177	-	0.00149901	0.000394073	0.000864372	0.000314243	0.000863219	0.0023546	0.00117261	0.000547388	0.000233263	0.000309191	0.000462499	0.000385416	0.000768994	0.000998924	0.0586269	0.000153457	0.451417	0.000229463	7.65e-05	0.000904909	0.000752672	0.000375516	0.00233663	0.000674612
	Leu3_TAG	-	0.000603938	0.00157934	0.00109609	0.000820419	0.000637175	0.0010065	0.00535439	0.0864064	0.00635916	0.0030888	0.00102819	0.000681489	0.00268887	0.000426658	0.000339415	0.000845881	0.000336899	-	0.000646674	0.000404073	0.00136283	0.000878384	-	0.000558436	0.000397867	0.000875099	0.000955566	0.000636132	0.00031875	0.000716104	0.00119341	0.000237436	0.000157965	0.000559552	0.000798339	0.000635526	0.0179163	0.00424662	0.000152753	0.573085	0.000450281	0.000372051	0.000504941	0.000431686	0.00107751	0.000432214	0.00115042
	Arg2_ACG	-	0.000305976	0.000356506	0.000215249	0.000306166	0.000198467	0.000410503	0.00104533	0.0335517	0.000194943	0.000349966	0.0001886	0.000333498	0.00018729	0.000229194	0.000357168	0.000543253	0.000694474	-	0.000281073	0.000266715	0.000382209	0.000601222	-	0.000139348	0.000222525	0.000209272	0.000278699	0.000138796	0.000264315	0.000319706	0.000166931	0.000346673	0.000306053	0.000349807	0.00254542	0.000124754	0.999209	0.00092672	0.000732358	0.000442013	0.000123815	0.000206078	0.000289005	0.000178621	0.000179125	0.000206361	0.000479925
	Arg3_CCG	-	0.00110314	0.00152964	0.00225141	0.00150094	0.000747384	0.00148368	0.00368596	0.0646109	0.00036483	0.00246219	0.000348189	0.00173491	0.00137836	0.000339789	0	0.000337838	0.00233333	-	0.000331785	0.00066379	0.000332447	0.00199269	-	0.000330142	0.000331016	0.000994036	0.000332668	0.00132231	0.00165344	0.000661157	0.000329598	0.000662032	0.00230718	0.000992392	0.00429752	0.000657462	0.000653168	0.00193174	0.0015873	0.394913	0.000948467	0.000308166	0.00113791	0.000453309	0.00135563	0.00134529	0.00022553
	Pro1_CGG	-	0.000690131	0.000265657	0.000652443	0.000783546	0.000714286	0.000520291	0.000388802	0.0543141	0.00390775	0.00223129	0.00146134	0.000885012	0.00101304	0.000694094	0.000756907	0.00125953	0.000440003	0.000626213	0.000561798	0.000374579	0.00143275	-	-	0.000124618	0.000497234	0.000310771	0.000807805	0.000683272	0.000311333	0.000496925	0.000310926	0.000684846	0.000681579	0.000433249	0.00335112	0.000248401	0.000866069	0.0046824	0.000800443	0.928418	0.000306185	0.000301441	0.00075909	0.00370756	0.000555345	0.00312705	0.000704597
	Pro2_GGG	-	0.00130463	0.000991408	0.00120455	0.00130947	0.000327011	0.000543774	0.00260332	0.0884449	0.00150716	0.00232804	0.000735062	0.00125536	0.000839631	0.000729775	0.000937207	0.00145788	0.00072856	0.000934191	0.000620155	0.00103477	0.00154687	-	-	0.000103167	0.000514986	0.000102859	0.000514721	0.00010304	0.000722916	0.00051573	0.000619259	0.000822876	0.000516956	0.000206079	0.00187578	0.00041425	0.000719868	0.0010321	0.000729395	0.427774	0.000407623	0.000305935	0.000887399	0.0018699	0.00108023	0.000589159	0.000686746
	Pro3_TGG	-	0.00148423	0.000541644	0.000864411	0.000738128	0.000654557	0.000819202	0.0019197	0.0752889	0.000364225	0.00248129	0.000782411	0.00120787	0.00066357	0.000348905	0.000774683	0.000773724	0.000424891	0.000499904	0.000611434	0.000803551	0.00160385	-	-	0.000496942	0.000610594	0.000610291	0.00106838	0.000647644	0.000496164	0.000381811	0.000418936	0.000761528	0.000266657	0.000228903	0.00461574	0.000613944	0.000799787	0.0102696	0.000697504	0.933484	0.000326537	0.000395271	0.000760746	0.00135311	0.000672528	0.000637943	0.00104661
	Gln2_CTG	-	0.000923112	0.001056	0.000775638	0.000740242	0.000739744	0.000772123	0.000838842	0.115055	0.00175079	0.00399528	0.000853382	0.00127844	0.00229043	0.000749747	0.00100902	0.00202046	-	-	0.00110171	0.000549842	0.000806894	-	-	0.000388299	0.000776448	0.00157881	0.000515879	0.000516846	0.000908825	0.000612666	0.000612192	0.000869481	0.000649709	0.000260918	0.00246234	0.000517397	0.00100068	0.000609052	0.00077049	0.00207556	0.000257136	0.000514007	0.000547875	0.000864886	0.00125168	0.00193805	0.00147012
	His_GTG	0.00101183	0.000697021	0.000940418	0.000871314	0.0009573	0.000778626	0.000688247	0.00088682	0.110927	0.00189931	0.00176037	0.000498407	0.000540856	0.00040891	0.000468454	0.000382572	0.000741997	0.00048418	-	0.000372717	0.000848422	0.00175366	-	-	0.000432999	0.000577212	0.000495131	0.000599396	0.00061834	0.000579135	0.000721843	0.000473456	0.00102878	0.000432339	0.000560224	0.000681424	0.000576404	0.00266941	0.000940618	0.00108458	0.00130877	0.000448549	0.000286041	0.000672824	0.000774641	0.000670868	0.000670296	0.000710732
	Gln1_TTG	-	0.00109745	0.000776624	0.000994514	0.00108633	0.0008905	0.000570867	0.000570505	0.0737868	0.0016921	0.00363196	0.00105551	0.00151957	0.00207212	0.00064687	0.000768829	0.00160227	-	-	0.00159085	0.000488818	0.000915555	-	-	0.000397177	0.000610203	0.00124893	0.00079249	0.000884335	0.000826573	0.0006396	0.00136915	0.00097294	0.00118957	0.0014818	0.00334736	0.000854857	0.0147138	0.00079984	0.00181396	0.00271975	0.000278288	0.000416852	0.00127597	0.00113611	0.000890051	0.00204981	0.000775323
	fMet1_CAT	-	0.00592813	0.00110338	0.00194438	0.00174046	0.00127635	0.0031057	0.00470483	0.0808173	0.0028998	0.00415987	0.00224759	0.00097746	0.00124587	0.000619	0.000968337	0.00121468	0.00081626	0.000616315	0.000569311	0.000709756	0.00175316	-	-	0.000453467	0.000661521	0.000661667	0.000539292	0.000604511	0.000591565	0.000630812	0.000709814	0.00165084	0.000361499	0.00136381	0.00246556	0.00137161	0.00104218	0.00052096	0.000461217	0.000322536	0.000367786	0.00062184	0.000565337	0.000656856	0.000436731	0.000264815	0.000356962
	fMet2_CAT	-	0	0	0.00362319	0.00181818	0	0	0.00725953	0.0515098	0	0.0017452	0	0	0	0.00171233	0	0	0.00170358	0	0.00169491	0.00172414	0	-	-	0	0	0	0	0	0	0	0.0017094	0.00171527	0	0.00174216	0.00522648	0.00176678	0.00679117	0.00338983	0	0	0	0	0	0	0	0.00172712	0.0017094
	Ile2_CAT	-	0	0.00201613	0	0	0	0	0.0019802	0.0275591	0.00193424	0	0.00186916	0	0	0	0	0	-	-	0	0	0.00179211	0	-	0	0	0	0	0	0	0	0	0	0.00176056	0	0	0.00524476	0.697952	0	0.000809225	0.00260679	0.000748628	0.000329435	0.000491521	0.00057255	0.000491079	0.00122669	0.000653541
	Met_CAT	-	0.000628931	0.000436279	0.000576646	0.00057441	0.000238823	0.00071449	0.0052108	0.0967239	0.000563539	0.00308941	0.000503778	0.000274763	0.000273735	0.0003156	0.000269445	0.000628818	0.000805333	-	0.000176165	0.000307638	0.000658646	0.000656685	-	0.000435294	0.000608431	0.000479198	0.000783631	0.000609252	0.000740644	0.000868847	0.000609517	0.000391526	0.000688587	0.000475141	0.000645522	0.000387463	0.00441832	0.000386532	0.000214124	0.00144971	0.000255537	0.000127562	0.000551432	0.00042633	0.00042244	0.00143654	0.000592668
	Ile1_GAT	-	0.00120115	0.000376895	0.000704316	0.000893788	0.000531683	0.000551601	0.000719729	0.00277318	0.00044245	0.00158692	0.000566697	0.000494617	0.000691904	0.000502434	0.00100298	0.000824764	0.00161676	-	0.000238589	0.000352364	0.00107816	0.000868522	-	0.00038131	0.000401321	0.000309361	0.000485317	0.00109137	0.00213292	0.000751756	0.000380384	0.000637349	0.000845989	0.000505968	0.00052541	0.000904354	0.00162319	0.000653114	0.000226729	0.00195645	0.0003075	0.000449649	0.000523657	0.000698224	0.000652722	0.000753672	0.00378141
	Arg5_CCT	-	0.00179211	0	0.000552486	0.000547345	0	0.000546747	0	0.0764642	0	0.00259605	0.0015456	0.000515996	0.00204708	0.000509684	0	0.000507872	-	-	0.00101163	0	0	0	-	0	0	0	0	0.00100251	0.00200401	0.000503018	0.000502008	0	0.00150754	0.00100351	0.0125063	0.00101163	0.00150376	0.000491884	0.000979912	0.00439883	0.00146128	0.00241663	0.00193986	0.000971345	0.000962001	0	0.000480769
	Ser3_GCT	-	0.000778956	0.00049087	0.00117302	0.00140982	0.00145716	0.00198461	0.0251511	0.0577405	0.00743691	0.00399448	0.00142315	0.00103881	0.00286897	0.00154893	0.00407666	0.0138059	-	-	0.00163147	0.0014832	0.00124931	0.0014693	0.00227604	0.00181258	0.000902039	0.00193293	0.0018913	0.00161435	0.00788001	0.000581577	0.000992601	0.000893136	0.00178619	0.000806054	0.0157628	0.00110762	0.0048058	0.00164031	0.000381286	0.00254586	0.00137363	0.00378774	0.000662008	0.000847145	0.000478135	0.0046573	0.000621095
	Arg4_TCT	-	0.000411692	0.00252799	0.000716589	0.00071582	0.00142653	0.00106762	0.00141693	0.0658955	0.00137694	0.00470272	0.00131839	0.000990099	0.00065189	0.000644745	0.000320718	0.00159591	0.00219987	-	0.000925926	0.00122888	0.000921376	0.00121102	-	0.00119976	0.0012012	0.00060006	0	0.00029824	0	0.00119976	0	0.00119367	0	0	0.00654567	0.000889416	0	0.00112233	0	0.00192997	0.00110071	0.00302281	0.00110071	0.00110011	0.000822368	0.000545703	0.0035872
	Thr2_CGT	-	0.000942241	0.00109937	0.00116979	0.00199319	0.000916132	0.000497595	0.000413736	0.102207	0.0010576	0.00258921	0.000563335	0.000322737	0.000721674	0.000237248	7.87e-05	0.00134239	0.00031412	-	0.000616713	0.000924286	0.00223214	-	-	0.000617046	0.000690979	0.000538918	0.000538172	0.00030729	0.001078	0.00338071	0.000691776	0.000922793	0.000382848	0.000691776	0.000616856	0.000153622	0.00145293	0.0021309	0.000835232	0.00174613	0.000150989	0.000677864	0.000451399	0.000903955	0.00210732	0.000527744	0.000376081
	Thr1_GGT	-	0.000488715	0.00116486	0.000468773	0.000395143	0.000395158	0.000680418	0.00035736	0.089478	0.00236482	0.00277836	0.000595634	0.000667041	0.000313983	0.000481778	0.000308674	0.000754846	0.000546709	-	0.000675881	0.000777053	0.00182168	-	-	0.000269933	0.000471714	0.000539866	0.000405652	0.000809498	0.00289816	0.000606612	0.000504694	0.000640507	0.000471635	0.000234773	0.00105733	0.00163116	0.00100993	0.000439145	0.000472622	0.00680363	0.00026527	0.000430535	0.00039768	0.000826528	0.000658566	0.000787453	0.0009511
	Thr3_GGT	-	0.000402495	0.000632378	0.00108746	0.000832016	0.000499542	0.000332047	0.000785384	0.0120423	0.000695837	0.00122604	0.000448705	0.000532133	0.000611421	0.000446701	0.000324018	0.00117671	0.000685899	-	0.000554499	0.000712589	0.00181991	-	-	0.000515096	0.000671937	0.000435006	0.000514546	0.000751909	0.0029219	0.000395429	0.000395476	0.000712363	0.000515219	0.000315159	0.000598946	0.000717846	0.000908875	0.000475681	0.000672575	0.00645593	0	0.000310776	0.000426489	0.000736434	0.000774803	0.000885705	0.00104143
	Thr4_TGT	-	0.000975876	0.00134271	0.00111947	0.00111607	0.000558289	0.000452237	0.000243039	0.0696321	0.000859697	0.00245123	0.000811881	0.000642717	0.00134336	0.00102915	0.00139271	0.00177766	0.00312698	-	0.000911251	0.00123625	0.0017545	-	-	0.000520122	0.000843608	0.000486871	0.000454206	0.000583487	0.000779145	0.000682683	0.000194565	0.000616123	0.000453926	0.000390511	0.00126324	0.000582449	0.000872516	0.00102028	0.000538844	0.00149254	0.000411588	0.000284046	0.000691063	0.000379687	0.00059679	0.000595798	0.000313411
	Asn_GTT	-	0.000485728	0.000299945	0.000780898	0.000598695	0.000731889	0.000550612	0.00185934	0.0882157	0.000813489	0.00134683	0.00112779	0.000719497	0.000843303	0.00110855	0.000769069	0.00181192	0.00200659	-	0.000647231	0.00110184	0.00203291	-	-	0.000591708	0.000714629	0.000577582	0.000673345	0.000630898	0.00230979	0.00212434	0.00104367	0.00181675	0.000815458	0.000746269	0.000725908	0.000932567	0.00230554	0.000581773	0.000656247	0.00203652	0.000593237	0.000248978	0.0005493	0.000615433	0.000561923	0.000496635	0.000444201
	Lys_TTT	-	0.000849476	0.000978969	0.000835996	0.000811373	0.000956796	0.00350618	0.000791873	0.0548936	0.000937312	0.00489477	0.000633561	0.000426197	0.000728356	0.000386532	0.000566833	0.00133898	0.00077629	-	0.000590765	0.000652181	0.00181402	-	-	0.00104137	0.000759426	0.000627914	0.000544321	0.000984706	0.00074129	0.00554809	0.00104086	0.000658748	0.00119552	0.00173686	0.000625205	0.000624207	0.0075273	0.000412234	0.000397171	0.001524	0.000498148	0.000271307	0.000716886	0.000578029	0.000363443	0.000658346	0.000547889
Figure 3-figure supplement 1C	s4U	IAA	IAA-		s2C	IAA	IAA-		s2U	IAA	IAA-
	Leu5_CAA	0.883838	0.10233		Arg2_ACG	0.0121135	0.00254542		Glu_TTC	0.0634712	0.0112907
	Phe_GAA	0.867168	0.0864322		Arg3_CCG	0.13338	0.00429752		Gln1_TTG	0.0463607	0.0147138
	Leu4_TAA	0.832808	0.108652		Arg5_CCT	0.151173	0.0125063		Lys_TTT	0.0174033	0.0075273
	Trp_CCA	0.904489	0.0981039		Ser3_GCT	0.132717	0.0157628
	Cys_GCA	0.920719	0.0748784		Arg4_TCT	0.0785146	0.00654567
	Ser2_CGA	0.940767	0.0995935
	Ser5_GGA	0.943314	0.106559
	Ser1_TGA	0.931866	0.0693796
	Tyr1_GTA	0.7625	0.0310982
	Tyr2_GTA	0.760933	0.0435714
	Val2A_GAC	0.37163	0.0495433
	Val2B_GAC	0.847708	0.0947436
	Val1_TAC	0.910361	0.0802014
	Gly1_CCC	0.813386	0.0848908
	Gly3_GCC	0.166076	0.0191471
	Gly2_TCC	0.0266192	0.00397783
	Ala2_GGC	0.869343	0.137351
	Ala1B_TGC	0.916252	0.124729
	Asp_GTC	0.441715	0.0440149
	Glu_TTC	0.0995453	0.00759946
	Leu1(P)_CAG	0.0841832	0.007301
	Leu1_CAG	0.0647196	0.00553367
	Leu2_GAG	0.205096	0.0181976
	Leu3_TAG	0.899774	0.0864064
	Arg2_ACG	0.735225	0.0335517
	Arg3_CCG	0.913198	0.0646109
	Pro1_CGG	0.899093	0.0543141
	Pro2_GGG	0.829564	0.0884449
	Pro3_TGG	0.913536	0.0752889
	Gln2_CTG	0.946377	0.115055
	His_GTG	0.936131	0.110927
	Gln1_TTG	0.925119	0.0737868
	fMet1_CAT	0.815554	0.0808173
	fMet2_CAT	0.733524	0.0515098
	Ile2_CAT	0.604027	0.0275591
	Met_CAT	0.890663	0.0967239
	Ile1_GAT	0.0226252	0.00277318
	Arg5_CCT	0.870461	0.0764642
	Ser3_GCT	0.878368	0.0577405
	Arg4_TCT	0.919808	0.0658955
	Thr2_CGT	0.945671	0.102207
	Thr1_GGT	0.88397	0.089478
	Thr3_GGT	0.0934985	0.0120423
	Thr4_TGT	0.928669	0.0696321
	Asn_GTT	0.867764	0.0882157
	Lys_TTT	0.786827	0.0548936
	Tyr1_GTA	0.627907	0.0527831
	Tyr2_GTA	0.547753	0.0392432
[truncated: 50 more columns]
