# Supplementary material for: A tRNA modification in Mycobacterium tuberculosis facilitates optimal intracellular growth
Source: eLife. 2023 Sep 27;12:RP87146. doi: 10.7554/eLife.87146 (PMC10531406; doi:10.7554/eLife.87146)
Supplement: Figure 3—source data 1. [file elife-87146-fig3-data1.xlsx]

## Sheet: Fig. 3
Figure 3A	Species	-1	1	2	3	4	5	6	7	8	9	10	11	12	13	14	15	16	17	17A	18	19	20	20A	20B	21	22	23	24	25	26	27	28	29	30	31	32	33	34	35	36	37	38	39	40	41	42	43	44
IAA+	Leu5_CAA	-	1	0.274368	0.0381944	0.00689655	0.00684931	0.0017094	0.00679117	0.00841751	0.0230263	0.030303	0.0294118	0.0212121	0.0134529	0.00446429	0.0132159	0.00873362	0.0157593	-	0.0490463	0.00271739	0.00808625	0.0159151	-	0.00789474	0.00131406	0.0104031	0.0153649	0	0.00127877	0.00508906	0.00253807	0.00630517	0.0124533	0	0.00248447	0.00739827	0.0036855	0.00245098	0.0320285	0.121875	0.0891841	0.134647	0.948035	0.0176858	0.00117209	0.00308809	0.00336882
	Phe_GAA	-	1	0.302703	0.0488432	0.0151899	0.0100251	0	0	0.00498753	0.0823799	0.0838574	0.101695	0.0130112	0.0110294	0.0422535	0.00350877	0.0034965	0.0120898	-	0.0153061	0.00338983	0.00337838	-	-	0.0198676	0.0114566	0.00163399	0	0.00649351	0	0.00805153	0	0.00321027	0	0.00160256	0.00319489	0.021875	0.0138675	0.00764526	0.0135747	0.040521	0.251354	0.244681	0.970183	0.020904	0.0114541	0.00148564	0.00143641
	Leu4_TAA	-	1	0.273026	0.025641	0.00952381	0	0.00316456	0	0.00315457	0.0730994	0.0200573	0.0412088	0.026738	0.0183727	0.0026178	0.0103627	0.00771208	0.0347395	-	0.0450237	0.00471698	0.00934579	0.0115473	-	0.0269663	0.00224215	0.00888889	0.0196078	0	0.00863931	0.00215517	0.00429184	0.0127119	0.00421941	0.00210526	0.00627615	0.0184805	0.0580271	0.0961538	0.174603	0.357143	0.128537	0.106859	0.903719	0.01916	0.00393915	0.00183038	0.00101585
	Trp_CCA	-	1	0.474977	0.0252772	0.00441501	0.000882223	0.000881446	0.00395083	0.00306346	0.0133851	0.01989	0.0596896	0.0110193	0.0166409	0.0318471	0.00706845	0.00481303	0.0124314	-	0.0211167	0.00569395	0.00495751	-	-	0.00703235	0.00559441	0.00104785	0.00104675	0.00382343	0.00208116	0.00311203	0.00138122	0.00137931	0.00137741	0.00103199	0.0085266	0.0107962	0.0020202	0.00535834	0.00300501	0.0157739	0.0265515	0.056729	0.877368	0.0297634	0.00368436	0.00103627	0.000785518
	Cys_GCA	-	1	0.0534141	0.0125068	0.013412	0.0042735	0.00636943	0.00370175	0.00421274	0.0732064	0.0438637	0.06745	0.0150021	0.00596506	0.00886824	0.00168634	0.00210349	-	-	0.00293624	0.00334448	0.000417885	-	-	0.0103391	0.00411862	0.00695297	0.00447883	0.00203169	0.00202758	0.00564516	0.00120822	0.00321156	0.00200321	0	0.00120048	0.012253	0.00157853	0.00353913	0.00469667	0.00968992	0.0286145	0.0723018	0.898454	0.013782	0.00205955	0.000871931	0.00139315
	Ser2_CGA	-	1	0.231047	0.00716846	0.0176056	0.00350877	0.00696864	0.00347222	0	0.0618893	0.022293	0.01875	0.00621118	0.00309597	0	0	0.00308642	-	-	0.00917431	0.00304878	0.00303951	0.0060423	0.0119403	0.00887574	0.00879765	0.00872093	0.00289855	0	0.00289017	0.00288184	0	0.00287356	0	0.00286533	0.00285714	0.002849	0.00284091	0.00564972	0.0028169	0.00560224	0.0245902	0.0615385	0.816298	0.0288198	0.00273723	0.000911577	0.000910747
	Ser5_GGA	-	1	0.187649	0.0135948	0.00688044	0.00336395	0.00245225	0.00295972	0.00205471	0.0129294	0.0089196	0.0106885	0.00899126	0.00745721	0.00812417	0.00290171	0.00313366	-	-	0.0139054	0.00296244	0.0015381	0.00960862	0.00882694	0.00531423	0.00654195	0.00638613	0.0014803	0.00125099	0.0020429	0.00271647	0.00113058	0.00158031	0.00180282	0.000225301	0.0004504	0.00303098	0.000448833	0.00134469	0.00145463	0.00100604	0.00378619	0.000222668	0.00077873	0.00044479	0.00144348	0.00110914	0.00463679
	Ser1_TGA	-	1	0.260965	0.0134141	0.00985433	0.00680851	0.00169923	0.00254237	0.00505902	0.0258727	0.016956	0.00800961	0.00636689	0.0141232	0.00351837	0.00428182	0.00426357	-	-	0.0133843	0.00342988	0.00266059	0.0171834	0.0286647	0.00361533	0.00108342	0.0107181	0.00107066	0.000356761	0.000713012	0.00284394	0.00389518	0.00141443	0	0.000353482	0.0059733	0.0104312	0.00415512	0.013998	0.0111411	0.013653	0.0393474	0.0688114	0.855861	0.0265413	0.00362319	0.00112317	0.00083129
	Tyr1_GTA	-	1	0.141935	0.00641026	0.0188679	0.00625	0	0.00621118	0.00617284	0.0581395	0.160976	0.176707	0.0777778	0.028777	0.00714286	0.0175439	0.0104167	-	-	0.0136986	0.00341297	0.00677966	0.0166667	0.00662252	0.00983607	0.00651466	0.00324675	0.00645161	0	0.00641026	0.00952381	0.00943396	0.00625	0.00621118	0	0	0.0301205	0.00598802	0.00890208	0.0231884	0.133166	0.153191	0.276923	0.971626	0.0105818	0.0017677	0.00142076	0.0020623
	Tyr2_GTA	-	1	0.236923	0.024024	0.0118694	0.00882353	0.00584795	0.00581395	0.00289855	0.0308989	0.107769	0.163522	0.0610236	0.0135922	0.00579151	0.00384615	0.0170132	-	-	0.0275735	0.00729927	0.00182149	0.0196429	0.0053286	0.00705467	0.00526316	0.0052356	0.00347826	0.0034662	0	0.00688468	0.00683761	0.00510204	0.00675676	0	0.003367	0.013289	0.00495868	0.00819672	0.0113452	0.0872781	0.124352	0.234127	0.96761	0.0121572	0.00155294	0.00104477	0.00189597
	Val2A_GAC	-	1	0.234079	0.0340815	0.00434513	0.00329965	0.0150315	0.00745968	0.00561347	0.00894099	0.0154538	0.0148391	0.00326546	0.00629891	0.00776515	0.00452489	0.00112994	0.00300413	-	0.0296958	0.00615607	0	0.0132214	-	0.0168628	0.00419801	0.00122292	0.000872753	0.00191638	0.00191271	0.00242845	0.00155871	0.00121086	0.000172951	0.00241546	0.000344947	0.000344828	0.00240798	0.00223099	0.00205515	0.00849041	0.00135662	0.00438967	0.00118044	0.000168606	0.00269043	0.00117568	0.000503609
	Val2B_GAC	-	1	0.327795	0.0310689	0.0067157	0.00572337	0.0131785	0.00793774	0.00449334	0.0198937	0.0109643	0.0130448	0.00457429	0.00484581	0.00656455	0.00131119	0.00116414	0.00391361	-	0.0198892	0.00396208	0.000282925	0.0102212	-	0.0138083	0.00289137	0.00164949	0.00137268	0.00355629	0.00136593	0.00204471	0.00204054	0.000543848	0.000815107	0.00176295	0.000542152	0.000541859	0.00216275	0.000810373	0.00349933	0.00867245	0.000666667	0.00305729	0.000929615	0.000796178	0.00172208	0.000926416	0.00026462
	Val1_TAC	-	1	0.108039	0.00846147	0.00480567	0.00600349	0.00277754	0.00292725	0.013211	0.0196832	0.0135019	0.0134286	0.00600258	0.00471793	0.00458984	0.00131535	0.00118109	0.00342534	-	0.00280906	0.00100129	0.00223472	-	-	0.000998056	0.00133771	0.00298125	0.000744757	0.00211221	0.00113305	0.0013656	0.000974482	0.000415606	0.000168811	0.000791488	0.000557623	0.000272253	0.000634855	0.00223641	0.0171899	0.0134615	0.000901634	0.00263533	0.00083611	0.000324355	0.00119619	0.00170415	0.000236286
	Gly1_CCC	-	1	0.162584	0.0390583	0.00558659	0.00185874	0.00580781	0.00681699	0.00235417	0.00932884	0.0203097	0.022338	0.0129838	0.00657094	0.0134454	0.00191709	0.00358166	-	-	0.00333175	0.000951022	0.00260849	-	-	0.00589345	0.00609185	0.00093633	0.00140252	0.00395809	0.00348028	0.000231965	0.00115848	0.00461255	0.000461042	0.00458926	0.00160367	0.00114416	0.00228311	0.00431916	0.00272047	0.000679656	0.000905387	0.0018075	0.000677354	0.00225276	0.00269602	0.0031355	0.00401517
	Gly3_GCC	-	1	0.176139	0.0331883	0.00367578	0.00253831	0.003373	0.00362527	0.00729036	0.00516296	0.00277352	0.00487954	0.00291917	0.00306181	0.0030826	0.000815316	0.00055833	0.00342873	-	0.0166657	0.00172717	0.00443837	-	-	0.00403987	0.00287524	0.000598043	0.000626822	0.00271854	0.000987583	0.0028096	0.0021244	0.000231174	0.000389954	0.0097397	0.000543183	0.000457208	0.0017116	0.00197868	0.00306535	0.00402827	0.000565052	0.000649387	0.000437439	0.000282139	0.00194298	0.00192519	0.00025288
	Gly2_TCC	-	1	0.162661	0.0431339	0.00559879	0.00198883	0.00273895	0.00554147	0.00597517	0.00897483	0.00980302	0.00709542	0.00614773	0.0161879	0.00539632	0.0026469	0.00176149	-	-	0.00131938	0.000703173	0.00149201	0.003324	-	0.00279135	0.00130673	0.00312636	0.00138756	0.000866476	0.00439959	0.00137836	0.000688705	0.00189036	8.59e-05	0.00102995	0.00265365	0.00205023	0.00136495	0.0110521	0.0187914	0.00280667	0.000659957	0.00107128	0.00156327	0.00188881	0.00262102	0.000573019	0.00138968
	Ala2_GGC	-	1	0.0495036	0.0098735	0.00355763	0.0018413	0.00726814	0.00450587	0.00409907	0.0254815	0.00771895	0.0102416	0.00444024	0.00474651	0.00395338	0.00101787	0.00113872	0.00376793	-	0.00351245	0.000887419	0.00301617	-	-	0.00112477	0.00144404	0.00307914	0.00035977	0.00255183	0.00179105	0.000914586	0.00079466	0.00273408	0.00158247	0.00157997	0.000552682	0.00252018	0.00110136	0.0010609	0.00192164	0.00230847	0.00284811	0.00109124	0.00136219	0.00139915	0.00348567	0.000503232	0.000502979
	Ala1B_TGC	-	1	0.0474949	0.00949543	0.00338468	0.00148291	0.00594779	0.00450474	0.00548126	0.0298321	0.0081646	0.0105984	0.00557492	0.00455796	0.00395055	0.00165394	0.00127065	0.00397083	-	0.00326406	0.000772055	0.00296908	-	-	0.00166243	0.00109663	0.00320127	0.000593055	0.00244427	0.00208184	0.000558989	0.000682742	0.00116241	0.00032537	0.000557465	0.00301051	0.00140293	0.00446627	0.00658667	0.00458347	0.00212028	0.00369677	0.00110028	0.000497138	0.000526989	0.00322677	0.000345071	0.000464879
	Asp_GTC	-	1	0.0547226	0.00901309	0.00354486	0.00477455	0.00571407	0.00176934	0.0018032	0.00553932	0.0099229	0.00903789	0.00609632	0.00461373	0.0058431	0.00130204	0.00138298	0.00495172	-	0.0071004	0.000420242	0.000140061	0.00644765	-	0.0130249	0.00372871	0.00136646	0.000807837	0.00333398	0.000623314	0.000543688	0.000905326	0.000305454	0.000147049	0.000169643	0.00147936	0.00112801	0.000428459	0.00110375	0.00286379	0.00496161	0.00145062	0.00150414	0.000946158	0.00058961	0.00318263	0.000243905	0.000144105
	Glu_TTC	-	1	0.0650471	0.0258494	0.0107483	0.00324401	0.00350429	0.00346508	0.002619	0.00774259	0.0097891	0.00261946	0.00253365	0.012587	0.00156116	0.00207722	0.000933876	-	-	0.000984788	0.00253328	0.000620011	0.00203671	0.00239191	0.000719628	0.000488081	0.00107775	0.000436043	0.00174113	0.0128652	0.000227428	0.00239488	0.000680186	7.56e-05	0.00050355	0.000980959	0.000954894	0.00240656	0.0323355	0.0567238	0.247343	0.00231959	0.00344172	0.000855417	0.000444619	0.00277967	0.00115828	0.000493726
	Leu1(P)_CAG	-	1	0.35371	0.0321759	0.00347908	0.00337363	0.00744117	0.00204214	0.00314611	0.00533824	0.00293659	0.00311042	0.0048252	0.0017268	0.00154265	0.00792222	0.00215595	0.00553868	-	0.0441465	0.00272503	0.0146837	0.0121021	-	0.00830251	0.00311399	0.00359272	0.0093027	0.000889033	0.00233833	0.00177077	0.000482703	0.00216746	0.00176296	0.000720692	0.00167879	0.00111794	0.0011167	0.00270464	0.00388273	0.000316857	0.00158178	0.00566216	0.0250709	0.00160747	0.00168119	0.000458295	0.00297007
	Leu1_CAG	-	1	0.362375	0.0305684	0.00409218	0.00391148	0.0102087	0.00247978	0.00340315	0.00622043	0.00283042	0.00326137	0.00432305	0.00208743	0.00115173	0.00698046	0.00167329	0.00627947	-	0.0432708	0.0027995	0.0130413	0.0107689	-	0.00859889	0.00210913	0.00310894	0.00770356	0.000605931	0.00138815	0.00136848	0.00104747	0.00255003	0.00120273	0.000989504	0.00179907	0.00156731	0.000756669	0.00217727	0.00287135	0.000420021	0.00152026	0.00492088	0.0237651	0.00226949	0.00216319	0.00114787	0.00299572
	Leu2_GAG	-	1	0.209184	0.0295798	0.00593135	0.00176367	0.00438982	0.00548834	0.00360428	0.00740193	0.00588668	0.00706283	0.00508844	0.0031401	0.00204893	0.00966818	0.00238152	0.00803213	-	0.0558715	0.00244744	0.0129571	0.0126843	-	0.0112552	0.00245937	0.00309136	0.00793147	0.000317158	0.00305649	0.000526704	0.000736842	0.00866117	0.00950904	0.00789582	0.0011267	0.000614188	0.00143105	0.00173469	0.00264604	0.00314497	0.00303429	0.00683074	0.0234452	0.00156709	0.00234512	0.00301997	0.00165337
	Leu3_TAG	-	1	0.22953	0.0337428	0.00359066	0.00309144	0.00178658	0.00339916	0.00723124	0.0173693	0.0133977	0.00696163	0.00782809	0.00458365	0.00395678	0.00499697	0.00286879	0.0125242	-	0.0589308	0.00293788	0.00983516	0.00564738	-	0.00575185	0.00109439	0.00259244	0.00946074	0.000135135	0.000135117	0.00443906	0.00295064	0.00174053	0.00106995	0.000534688	0.0016015	0.0101717	0.00276643	0.00900783	0.0426197	0.0171969	0.00476773	0.0185963	0.0345187	0.0028875	0.000692521	0.000115407	0.000922403
	Arg2_ACG	-	1	0.122293	0.0256273	0.00549409	0.00553954	0.00723218	0.0047237	0.00477576	0.0223957	0.0495077	0.0523687	0.0167334	0.0120636	0.0153972	0.00612117	0.00373367	0.0160421	-	0.00880015	0.00344744	0.00307507	0.00724291	-	0.0156149	0.00346447	0.00205098	0.00216349	0.00650633	0.00243394	0.0110041	0.00171644	0.000971706	0.0031339	0.000284819	0.000512412	0.00897139	0.0385179	0.0654059	0.017681	0.0319657	0.00245287	0.0151573	0.0209155	0.00452426	0.00106069	0.000737327	0.00613722
	Arg3_CCG	-	1	0.30916	0.0385321	0.00728597	0.00633484	0.0116279	0.00974314	0.00440917	0.017331	0.0399334	0.0824427	0.0135542	0.00821509	0.0154412	0.003663	0.00219298	0.00436681	-	0.00145349	0.00506146	0.00144404	0.00787966	-	0.0141243	0.00141044	0	0	0.000704722	0	0.000704225	0.00070373	0.00210674	0.00140252	0.00627178	0.00485437	0.00757054	0.0434496	0.243902	0.0147131	0.00390816	0.0261656	0.0353373	0.268055	0.00268007	0.00962176	0.0108303	0.00229208
	Pro1_CGG	-	1	0.79796	0.0196178	0.003657	0.00414417	0.00175505	0.00162703	0.0113833	0.0647998	0.00735125	0.00741079	0.00645673	0.00338677	0.00214036	0.00470905	0.00134363	0.00256868	0.00300635	0.00155642	0.000666593	0.00133141	-	-	0.00353787	0.00429326	0.00197759	0.000878156	0.00153441	0.000328695	0.00229558	0.00152805	0.00119917	0.00108897	0.0021732	0.00151893	0.00140845	0.00901868	0.0162653	0.0112782	0.00073046	0.00488058	0.0165441	0.582662	0.0106679	0.00101095	0.00285618	0.000545737
	Pro2_GGG	-	1	0.847037	0.00723982	0.00378651	0.0043088	0.00553473	0.00355809	0.00159858	0.0110662	0.0143698	0.0218459	0.00488709	0.00319167	0.0018444	0.00417432	0.000500668	0.00149975	0.00265913	0.000664341	0.0006639	0.00132604	-	-	0.00379789	0.00263505	0.0021364	0.00196818	0.0013104	0.000163773	0.00130847	0.000490436	0.000653488	0.000163345	0.000979112	0.00873504	0.00161499	0.00112921	0.00321595	0.000642777	0.000802826	0.00352	0.0063593	0.0405735	0.00228276	0.00091227	0.000152022	0.000455858
	Pro3_TGG	-	1	0.780215	0.0143879	0.00368383	0.0058121	0.0023036	0.00166534	0.00426406	0.00876644	0.0243604	0.0487433	0.00656708	0.00352366	0.00272519	0.004	0.00171135	0.00234759	0.0037562	0.00458554	0.000916267	0.00126707	-	-	0.00385667	0.00286673	0.00223245	0.00160201	0.00180769	0.000416985	0.00242651	0.000762037	0.00152175	0.000622148	0.000483659	0.00103534	0.002616	0.00947835	0.0363385	0.0271687	0.00344015	0.00633032	0.0134274	0.546813	0.00481649	0.000900521	0.00104014	0.0012354
	Gln2_CTG	-	1	0.124283	0.0171928	0.00660974	0.00221441	0.00230537	0.00292118	0.00727359	0.0236714	0.00814842	0.0025714	0.00197058	0.00415298	0.000547345	0.000547046	0.000774382	-	-	0.00584186	0.00135673	0.00212103	-	-	0.00507363	0.00286533	0.00120735	0.000670301	0.000223384	0.000803536	0.000981135	0.00111368	0.000311735	0.00026713	8.9e-05	0.00204363	0.00670756	0.00136612	0.00964518	0.00139464	0.000696834	0.00113107	0.00156365	0.00216703	0.000649688	0.000432938	0	0.000216422
	His_GTG	1	0.0600192	0.0112375	0.00620804	0.0036976	0.00154388	0.00534134	0.00379128	0.0036119	0.0241552	0.00706373	0.0106417	0.00373441	0.00447385	0.00716319	0.00134325	0.000998627	0.00342104	-	0.0159148	0.00207684	0.00446958	-	-	0.00381645	0.00274875	0.000392524	0.000693983	0.00252814	0.000811957	0.000601088	0.000600727	0.000720353	0.000599934	0.000629534	0.00113786	0.00840286	0.00097888	0.00431213	0.00262173	0.00328841	0.00149516	0.0024274	0.00349722	0.00058253	0.000494905	0.000291036	0.000465441
	Gln1_TTG	-	1	0.190824	0.0201621	0.00609302	0.00222913	0.00188781	0.00396213	0.00937999	0.0354828	0.0154147	0.0037762	0.00282415	0.00511988	0.00130947	0.00112115	0.000746872	-	-	0.00544723	0.00117472	0.00332758	-	-	0.00514958	0.00396898	0.00176765	0.000670037	0.000608754	0.00145888	0.00188084	0.00103037	0.00121073	0.0018128	0.00319239	0.00765093	0.0111709	0.0351848	0.102605	0.0402731	0.0352066	0.00565398	0.00496953	0.00373657	0.00232992	0.001396	0.000232612	0.000186055
	fMet1_CAT	-	1	0.597043	0.0199301	0.00914354	0.00307443	0.00224235	0.00263007	0.00226709	0.01023	0.00549982	0.0026812	0.0032315	0.00504006	0.00194272	0.00214626	0.000778277	0.00219166	0.00213532	0.000774313	0.00055032	0.00113375	-	-	0.00284344	0.00375427	0.00217954	0.00159804	0.0017141	0.00106805	0.000152555	0.000457457	0.00320881	0.000202621	0.000135062	0.0018873	0.00146388	0.00327038	0.0108494	0.00117645	0.00208344	0.000776551	0.000297314	0.0012867	0.0003463	0.000181363	6.59e-05	0.000346095
	fMet2_CAT	-	1	0.58651	0.0257143	0	0.002849	0	0.00566572	0	0.0194444	0.027027	0.00537634	0.015873	0.0181818	0.0102828	0.00765306	0	0.00507614	0	0.00253165	0	0.00503778	-	-	0.0075	0.00497512	0	0.00248139	0	0.00247525	0	0	0	0	0	0.00492611	0	0.0145631	0.0213777	0	0.00236967	0	0	0	0	0.00236407	0.00235849	0.00235294
	Ile2_CAT	-	1	0.0629371	0.0137931	0.0136054	0	0.00675676	0.00671141	0	0.107784	0.0972973	0.0703518	0.0148515	0.0194175	0.0143541	0.00947867	0.00471698	-	-	0.00934579	0.00925926	0	0.00917431	-	0.0521739	0.00862069	0.00429184	0.0042735	0.00847458	0	0.00421941	0	0	0.00420168	0	0	0.0245902	0.046875	0.434879	0.83247	0.588495	0.0136596	0.00596837	0.00593296	0.00354715	0.000295508	0.000295421	0.00147493
	Met_CAT	-	1	0.228323	0.00894424	0.00968543	0.005352	0.0041817	0.00845528	0.00178542	0.00604985	0.0219329	0.0283634	0.00571646	0.00583466	0.00781896	0.00210068	0.00157303	0.00306176	-	0.0162357	0.00511621	0.000730353	0.0106936	-	0.0117109	0.00277718	0.00106701	0.000852878	0.0031881	0.000920159	0.00225989	0.00274667	0.00112557	0.0049699	0.00181666	0.000628448	0.00167306	0.00187865	0.00277546	0.00338842	0.00268965	0.00357339	0.00702832	0.00610376	0.00128691	0.00101495	0.00652057	0.00228035
	Ile1_GAT	-	1	0.481377	0.0111548	0.00340248	0.00396683	0.00802491	0.00399642	0.00384272	0.00320223	0.00571281	0.00282555	0.00328564	0.00338016	0.00174738	0.00117358	0.000841865	0.000841157	-	0.00315935	0.00365503	0.00038773	0.00732769	-	0.009966	0.0021206	0.000716102	0.000292201	0.00228853	0.00112114	0.000843784	0.000407178	0.00171302	0.000551348	0.000377096	0.000376954	0.000420272	0.000767493	0.000766904	0.0027993	0.00872513	0.00198424	0.00444823	0.0018441	0.000297805	0.000481928	0.00116095	0.000721531
	Arg5_CCT	-	1	0.0678497	0.0283976	0.0169492	0.000996016	0.00396825	0.00787402	0.00489716	0.0182692	0.0352505	0.0110092	0.00547445	0.00363636	0.0063234	0.0027027	0.00090009	-	-	0.00448029	0.00178891	0.000893655	0.00178412	-	0.0123348	0.00351185	0.00262697	0.000874891	0.000874126	0.0017452	0.00087184	0	0.0026087	0.00086881	0.00259965	0.000865801	0.000865052	0.0277544	0.148281	0.00852273	0.00283286	0.00912281	0.00627615	0.00278164	0.000694927	0	0.00138792	0.00276817
	Ser3_GCT	-	1	0.20256	0.0206316	0.0116078	0.00809087	0.00541628	0.00828729	0.00275482	0.0249217	0.0117977	0.00992846	0.0155239	0.0161222	0.0102184	0.00929136	0.0113792	-	-	0.0125897	0.00912139	0.00414106	0.0219493	0.0198489	0.00938729	0.0109159	0.0150766	0.00221948	0.00429711	0.00658617	0.00376671	0.00471641	0.00433474	0.0016829	0.00323508	0.00215208	0.00712251	0.0434881	0.110314	0.028748	0.0168805	0.010688	0.0171638	0.00790918	0.000929627	0.0013925	0.00240785	0.00790151
	Arg4_TCT	-	1	0.117732	0.0312935	0.00415512	0.00138313	0.00413223	0.00479781	0.0034153	0.0481144	0.0228717	0.0241785	0.0110362	0.0103155	0.0119904	0.00714286	0.0023753	0.0237681	-	0.0142857	0.00906002	0.00394811	0.00894354	-	0.0186506	0.00164294	0.00109409	0.00218341	0.00488865	0.00216802	0.00592672	0.00322234	0.00107296	0	0.00214133	0.014248	0.0114763	0.0528656	0.267463	0.022293	0.00562984	0.0097561	0.00931999	0.00480934	0.00308219	0.0017094	0.000341763	0
	Thr2_CGT	-	1	0.0996642	0.0304651	0.00773047	0.000691802	0.00356158	0.0143812	0.00349808	0.0240088	0.00797553	0.0114483	0.00494358	0.00491926	0.00478927	0.00169996	0.000637078	0.00296422	-	0.0175767	0.00311042	0.00443848	-	-	0.00431655	0.00348218	0.00102312	0.000715673	0.00427568	0.000915378	0.00233384	0.00121617	0.00282971	0.0018158	0.0006049	0.00311558	0.00280617	0.00439034	0.00850811	0.00266404	0.00275509	0.0101295	0.00657958	0.00395143	0.00115518	0.0019216	0.00105576	0.000383767
	Thr1_GGT	-	1	0.193124	0.0279436	0.00981229	0.00218925	0.00351472	0.0123294	0.00298365	0.026094	0.00526072	0.00631893	0.00440378	0.00478115	0.0076254	0.000959314	0.000451238	0.00309267	-	0.0174043	0.00198511	0.00335238	-	-	0.00312277	0.00322193	0.000709413	0.000490891	0.00217699	0.00168432	0.000760085	0.000867914	0.00184092	0.00113575	0.000270343	0.000486381	0.000863931	0.00237018	0.000645995	0.00188061	0.00433341	0.0175033	0.00890811	0.0119415	0.000617284	0.000719646	0.00159097	0.0012302
	Thr3_GGT	-	1	0.164159	0.0249701	0.00919608	0.00313461	0.00400566	0.0142268	0.00358734	0.00740868	0.00303464	0.00421917	0.00250242	0.00345727	0.00344535	0.00124105	0.000676476	0.00325898	-	0.0123203	0.0012748	0.00391984	-	-	0.00346611	0.00296215	0.000493448	0.000274063	0.00251504	0.000983177	0.000436777	0.000654736	0.00130776	0.000979858	0.00054407	0.000869754	0.000760456	0.00205984	0.000433463	0.00124466	0.00345144	0.0163387	0.00669196	0.0116655	0.000468482	0.000936086	0.00109091	0.00098604
	Thr4_TGT	-	1	0.085034	0.0255604	0.00658519	0.00089211	0.00278009	0.0158687	0.00191152	0.0160675	0.0147713	0.0106851	0.00510683	0.00580251	0.00648549	0.000771486	0.00205307	0.00327416	-	0.00907432	0.00212465	0.00176741	-	-	0.00337192	0.00261018	0.00140351	0.00135155	0.00274561	0.000748242	0.00357871	0.000745008	0.00109149	0.00029759	0.000148773	0.00257209	0.00994123	0.00292969	0.0259678	0.00750531	0.00535236	0.0150296	0.00474064	0.00553826	0.00159942	0.000639357	0.00136818	0.000820232
	Asn_GTT	-	1	0.455756	0.0579891	0.00585682	0.00178829	0.00395067	0.00236934	0.00170575	0.00789729	0.013577	0.0139797	0.00690888	0.00513877	0.0124831	0.00134713	0.00100399	0.00505834	-	0.00681809	0.00107538	0.000990057	-	-	0.00448769	0.00480007	0.000938262	0.000645941	0.00263929	0.000975792	0.000166065	0.000414989	0.00223593	0.00101342	0.000206778	0.00144535	0.00748012	0.00165722	0.0138808	0.0145536	0.0164457	0.00739533	0.00377074	0.00373738	0.00144278	0.000595993	0.00011534	0.000326691
	Lys_TTT	-	1	0.120007	0.00912909	0.00363256	0.00935629	0.0123962	0.00269374	0.00358818	0.0344019	0.0230023	0.017133	0.00598927	0.00690476	0.00990885	0.00443538	0.00137461	0.00975524	-	0.0308545	0.00316579	0.00585871	-	-	0.00460274	0.00448613	0.000862895	0.000838223	0.00241304	0.0010978	0.00257082	0.00171094	0.00307969	0.00469218	0.00141273	0.00230214	0.00940125	0.00336287	0.035262	0.221155	0.151022	0.0110464	0.00515269	0.00542872	0.00254141	0.000908881	0.000951255	0.00123798
Figure 3B	Species	-1	1	2	3	4	5	6	7	8	9	10	11	12	13	14	15	16	17	17A	18	19	20	20A	20B	21	22	23	24	25	26	27	28	29	30	31	32	33	34	35	36	37	38	39	40	41	42	43	44
IAA-	Leu5_CAA	-	1	0.326531	0.0372285	0.0061665	0.00205128	0.0040858	0.00810537	0.00403633	0.00701403	0.0357488	0.00671785	0.00191571	0.000956938	0.00381315	0.00474383	0.00378072	0.00470367	-	0.0309936	0.00181984	0.00632911	0.00539568	-	0.00536673	0.000893655	0.0044484	0.000888889	0.000888099	0.00617829	0.00439367	0.00175439	0.0052356	0.00434405	0.0017346	0.000866551	0.000865801	0.00431035	0.00684931	0.0193115	0.120384	0.0757679	0.131079	0.949675	0.0200942	0.00169358	0.00265013	0.00275898
	Phe_GAA	-	1	0.333333	0.0276923	0.0101523	0.00303644	0.00101112	0.0040282	0.00301205	0.0225711	0.00682261	0.0153551	0.0095057	0.00848256	0.00933707	0.00186393	0.00186046	0.00185701	-	0.0110193	0.00274725	0.00182815	-	-	0.00182482	0.00272975	0	0	0.000909091	0	0.00181488	0	0.000906618	0.000905797	0	0.00180832	0.0036036	0.00179856	0.00179533	0.00801425	0.0335628	0.265022	0.244264	0.969474	0.0200478	0.00920902	0.00144302	0.00118696
	Leu4_TAA	-	1	0.349372	0.0224949	0.00811359	0.0100402	0	0.00200401	0.002	0.0366089	0.013308	0.0131332	0.00187266	0.00186916	0	0.00557621	0.00554529	0.0145719	-	0.031746	0.00351494	0.00350263	0.00522648	-	0.00692042	0.00344828	0.00172117	0.0102215	0.00844595	0.003367	0.00168067	0.00501672	0.00499168	0.00166113	0	0.00165837	0.00822368	0.00815661	0.0223285	0.142271	0.403752	0.139045	0.111111	0.931064	0.0164219	0.00299603	0.00160094	0.00130433
	Trp_CCA	-	1	0.477465	0.017165	0.00165837	0.00110436	0	0.00385039	0.00328947	0.01165	0.0330102	0.0054716	0.00440986	0.00976111	0.0394769	0.0193564	0.0377183	0.0169375	-	0.0188637	0.00313409	0.000894654	-	-	0.00245426	0.00178174	0.000667705	0.000222519	0.00044484	0.000444642	0.000444444	0.000888099	0.00110889	0.000443361	0.000221631	0.00088574	0.00198895	0.000220946	0.00396127	0.00460022	0.012546	0.0352671	0.0576205	0.882623	0.0273899	0.00349009	0.000670721	0.000223524
	Cys_GCA	-	1	0.0692282	0.00821288	0.00294792	0.00228758	0.00358189	0.00162549	0.00581771	0.0127632	0.0119798	0.023399	0.00824428	0.00425661	0.00784314	0.00360685	0.00359389	-	-	0.000299401	0	0.000598444	-	-	0.00328064	0.00386215	0.00590668	0.00323815	0.000588408	0.00176212	0	0.000587027	0	0.000293427	0	0.00058651	0.000878992	0.00087822	0.00146156	0.0029146	0.00579542	0.0403226	0.0788934	0.917926	0.0131942	0.00285472	0.000702842	0.00109441
	Ser2_CGA	-	1	0.274793	0.00819672	0.00204499	0.00204082	0.00406504	0	0.0020284	0.00804829	0.00798403	0.00595238	0.0019802	0.00197628	0	0.00393701	0.00392157	-	-	0.0077821	0	0	0.00772201	0.00766283	0.00191205	0.00380952	0.0112994	0.0018797	0	0.00374532	0.00186916	0	0	0	0	0.00186567	0.0018622	0.00555556	0.00917431	0	0.0108893	0.0299296	0.0734095	0.820445	0.0217765	0.00314196	0.00114123	0.00170892
	Ser5_GGA	-	1	0.177476	0.00569514	0.00308925	0.00266467	0.000832016	0.00199286	0.00289783	0.00780416	0.0145714	0.00611473	0.00384708	0.00287701	0.00151612	0.00254696	0.00071582	-	-	0.00506449	0.00110663	0.000631961	0.00503026	0.0056272	0.00365987	0.00519018	0.00146968	0.000850143	0.00131213	0.00107941	0.00169335	0.000384704	0.000922438	0.00184148	0.00053681	0.000689708	0.00130109	0.00076476	0.00068781	0.000229218	0.000458225	0.000686866	0.000152614	0.000914843	0.000837904	0.00152114	0.0012913	0.00204669
	Ser1_TGA	-	1	0.264459	0.00720558	0.00314254	0.00424676	0.00267499	0.0006683	0.00266607	0.00727834	0.00570175	0.00153273	0.00218484	0.00370048	0.00195525	0.00260022	0.000433182	-	-	0.00645578	0.000645161	0.000859476	0.012309	0.00987602	0.00688648	0.00270551	0.00373212	0.00124249	0.000827643	0.00041365	0.000413479	0.00165119	0.000412626	0.000412456	0	0.00103008	0.00185071	0.00123229	0.00875407	0.00425704	0.00644512	0.0257064	0.0705818	0.85066	0.0275718	0.00387832	0.000764526	0.000632311
	Tyr1_GTA	-	1	0.285714	0.0128205	0.00490677	0.00391007	0.00292398	0	0.00291545	0.015311	0.0439158	0.0275801	0.0044287	0.000884956	0.00176678	0.00176367	0.000881057	-	-	0.00525854	0.000875657	0	0.0043592	0.00174064	0.00605536	0.00258844	0.00258176	0.00171821	0	0.000858369	0	0.00256849	0.000855432	0.000854701	0	0.000853971	0	0.00255537	0.00170068	0.0117647	0.0517928	0.0570999	0.193333	0.960133	0.0116771	0.00116873	0.000929346	0.000952268
	Tyr2_GTA	-	1	0.29781	0.0129683	0.00358938	0.00428878	0.0021398	0.000712758	0.00142349	0.016795	0.0409396	0.0324675	0.00323625	0.00193798	0.00129032	0.002574	0	-	-	0.00320718	0.000641026	0.000640615	0.00319285	0.00697527	0.00379027	0.000631313	0.00314663	0.000628931	0	0	0.000628536	0.000628141	0.00125471	0.000626959	0	0	0.003125	0.00124844	0.00311139	0.00618429	0.0482637	0.061326	0.17951	0.959811	0.0120944	0.00152746	0.00109498	0.000789195
	Val2A_GAC	-	1	0.243735	0.0140069	0.00110046	0.00360276	0.00653595	0.00232883	0.00402041	0.00721523	0.0163093	0.00450992	0.00314701	0.00269018	0.0109387	0.00324149	0.00191176	0.00307873	-	0.0219386	0.00414108	0.000856042	0.00553349	-	0.00746374	0.00182738	0.000842697	0.00014043	0.00014041	0.00014039	0.000280702	0.00112155	0.00153975	0.000699399	0.00139684	0.000139665	0.000697837	0.00195013	0.00125209	0.00291303	0.00359364	0.000828615	0.00371492	0.000412598	0	0.00027499	0	0
	Val2B_GAC	-	1	0.333444	0.0141274	0.00227692	0.00291892	0.0040913	0.00503481	0.00181779	0.0136062	0.00493283	0.00490862	0.00343464	0.00176623	0.0129218	0.00122913	0.00173824	0.00336289	-	0.0133722	0.00190667	0.000100341	0.00280168	-	0.00665938	0.00198393	0.000990982	0.000198157	9.91e-05	0.000198098	0.000495	0.000494756	0.00128471	0.00039514	0.0019718	0	0.000197141	0.00127978	0.00108172	0.00245242	0.00244642	0.000977613	0.00389522	0.00038937	0	9.73e-05	0.000291914	0
	Val1_TAC	-	1	0.115658	0.00415607	0.0016931	0.00222769	0.0018992	0.00217241	0.00487558	0.00899792	0.0124955	0.00828512	0.00413433	0.00229748	0.00483757	0.00185918	0.00363461	0.00732058	-	0.00300632	0.00102423	0.000693908	-	-	0.000225469	0.000398748	0.000545814	0.000190565	0.000277109	0.000259722	0.000190427	0.000743842	0.000751925	0.000164187	0.000552744	0.000423015	0.000224407	0.000414118	0.00171392	0.00362138	0.00302864	0.00057289	0.00258413	0.000323978	0.000144916	0.000161939	0.000204513	7.67e-05
	Gly1_CCC	-	1	0.169598	0.0136307	0.0045815	0.00228551	0.00122915	0.00437063	0.00313698	0.0106897	0.0493362	0.00812876	0.00340246	0.00723822	0.034927	0.00201394	0.00170121	-	-	0.00246837	0.000770772	0.00138547	-	-	0.00123001	0.00138185	0.000153516	0.000613685	0.000613309	0.00153093	0.000306091	0.000305998	0.000611621	0.000152882	0.000458435	0.00030553	0.000305437	0.00122026	0.0021309	0.00212637	0.00121359	0.00045489	0.001514	0.000453995	0.000453789	0	0.00120864	0.000754831
	Gly3_GCC	-	1	0.170905	0.0112291	0.0021803	0.0014553	0.00151122	0.00207652	0.00358332	0.0048657	0.00231819	0.00222143	0.00156629	0.00125602	0.00458053	0.00112398	0.000669397	0.00296377	-	0.00974561	0.00127538	0.000760176	-	-	0.00102742	0.00100407	0.000457201	0.000200682	0.000167207	0.000245177	0.000267395	0.00177946	0.000211266	0.000177877	0.000921884	0.000144371	0.000266459	0.000920657	0.00103052	0.00179188	0.00118213	0.000220909	0.000772584	0.000121391	8.83e-05	0.00026476	0.000683497	9.92e-05
	Gly2_TCC	-	1	0.160414	0.0161566	0.00320786	0.00117701	0.0014365	0.00279984	0.00207927	0.00549273	0.00559054	0.00288332	0.00592357	0.00462816	0.00879784	0.0026324	0.00312402	-	-	0.00205761	0.00149421	0.00266998	0.00297158	-	0.00228536	0.00104893	0.00252339	0.000246124	0.000922112	0.00171832	0.000919681	0.000306466	0.0020186	0.000183475	0.000489027	0.000366636	0.000427559	0.0004884	0.00371024	0.00981691	0.00234333	0.000660502	0.00185796	0.000359475	0.000538922	0.000538632	0.000239335	0.000597979
	Ala2_GGC	-	1	0.0467209	0.00469335	0.00117914	0.000833333	0.00186433	0.00200372	0.0037074	0.0118081	0.00443297	0.00674395	0.00405218	0.00271258	0.00484795	0.0023907	0.00396869	0.00666105	-	0.00254915	0.00062334	0.000812392	-	-	0.000406031	0.000595158	0.00035156	8.11e-05	0.000216281	0.000162184	8.11e-05	0.000432269	0.000297097	0.000350991	0.000296904	0.000107953	0.000269811	0.00086265	0.000538866	0.00115722	0.000484183	0.000537692	0.000779046	0.000268565	0.000483183	0.000268363	0.000214644	0.000107311
	Ala1B_TGC	-	1	0.0460988	0.00426221	0.00121341	0.000959693	0.00240857	0.00238272	0.00358631	0.0103109	0.0039304	0.00576343	0.00408734	0.00242889	0.00375114	0.00183333	0.00400943	0.00754605	-	0.00333518	0.000783011	0.000753795	-	-	0.000438726	0.000400416	0.000438358	0.000123869	0.000342903	0.00037134	0.000104726	0.000475801	0.00045656	0.000152164	0.000218687	0.000294666	0.000342075	0.000854457	0.00128951	0.00118381	0.000775979	0.0008793	0.00111443	0.000207731	0.00035868	0.000132128	0.00013211	4.72e-05
	Asp_GTC	-	1	0.0518587	0.00365568	0.00138528	0.00190317	0.00204537	0.000924432	0.00123915	0.0035107	0.0268829	0.00284276	0.00211778	0.00343445	0.00939648	0.00114047	0.00194579	0.00562863	-	0.00774017	0.000629441	0.00015165	0.00231487	-	0.00537982	0.0022372	0.000502743	0.000202557	0.000389957	0.000254907	0.000247348	0.000734011	0.000164751	0.000119804	0.000127276	0.000217071	0.000254432	0.000269326	0.00108361	0.00288378	0.00237885	0.000920954	0.00140174	0.00045221	0.000237169	0.000251928	0.000125948	4.45e-05
	Glu_TTC	-	1	0.0402552	0.00566361	0.00817066	0.00264516	0.00222944	0.00237134	0.00199122	0.00323746	0.00572612	0.00142142	0.00227232	0.00425252	0.0017461	0.00190266	0.000766871	-	-	0.000319428	0.000239513	7.98e-05	0.000430904	0.000350984	0.000255196	0.000334832	0.000701061	7.97e-05	0.000207072	0.00157445	9.54e-05	0.00152427	0.000428517	9.52e-05	0.000111074	0.000428245	0.000317118	0.000697173	0.00312747	0.0113682	0.0152999	0.00243895	0.0029365	0.000168209	0.00010703	0.000290427	0.00012227	0.000106975
	Leu1(P)_CAG	-	1	0.358153	0.0159492	0.00328692	0.00250373	0.00285324	0.00166162	0.00230906	0.00253942	0.00265049	0.00100029	0.00123413	0.000235018	0.000469814	0.00246046	0.00157922	0.00436758	-	0.0328903	0.00174285	0.00830731	0.00664599	-	0.00347701	0.00132282	0.00132108	0.00164862	0.000384531	0.00104264	0.0001646	0.000931864	0.000657354	0.00136761	0.00032812	0.000546568	0.000273209	0.000491535	0.00190788	0.00233848	0.000380538	0.00114031	0.00184282	0.018617	0.000903438	0.00111477	0.00053056	0.000318235
	Leu1_CAG	-	1	0.355555	0.018206	0.00301819	0.00259226	0.00327832	0.00153955	0.00235232	0.00236057	0.00195641	0.00107349	0.001141	0.000549579	0.000370828	0.00187808	0.00143733	0.00476826	-	0.0359348	0.00192698	0.00661519	0.0051947	-	0.00307367	0.00131555	0.0014553	0.00141466	0.000347115	0.00102743	0.000577597	0.00100017	0.000871181	0.00125395	0.000473206	0.00054964	0.000485493	0.00037037	0.00192477	0.00187028	0.000457817	0.00100365	0.00209184	0.0173292	0.00089618	0.00172714	0.000744971	0.000769212
	Leu2_GAG	-	1	0.206845	0.0105871	0.00435578	0.0023466	0.00251409	0.00112574	0.00276339	0.00481265	0.00538508	0.00247271	0.00238176	0.00127432	0.00101842	0.00169448	0.00101566	0.00630782	-	0.0440585	0.00312575	0.00494457	0.00838276	-	0.00417389	0.00172956	0.0014131	0.00172414	0.000469998	0.00366815	0.000312086	0.000857499	0.0055043	0.00601063	0.00368522	0.000920457	0.000536645	0.00122511	0.000841558	0.00160403	0.000305437	0.00167709	0.00182621	0.0146949	0.000149925	0.000149903	0.000449506	0.000374448
	Leu3_TAG	-	1	0.22945	0.0153299	0.00245767	0.00154503	0.0011801	0.00235465	0.00396897	0.00893975	0.0430319	0.00255995	0.0034864	0.000849618	0.00203493	0.0035485	0.0016027	0.00386522	-	0.0386138	0.00169355	0.00664904	0.00581395	-	0.00190779	0.000397298	0.0011112	0.00182222	0.000158428	0.000475059	0.000791139	0.00221029	0.00165498	0.000393887	0.000865801	0.000236072	0.00133595	0.0018825	0.00600343	0.025454	0.0145264	0.00387857	0.0102613	0.027706	0.00150505	7.17e-05	7.17e-05	0.000286553
	Arg2_ACG	-	1	0.137399	0.00895623	0.00278339	0.00406671	0.00424661	0.0026471	0.00339187	0.00737715	0.0272631	0.00532801	0.00509918	0.0027437	0.00490301	0.00239572	0.00321246	0.00737929	-	0.00452273	0.00236811	0.00134339	0.00455508	-	0.00247339	0.00105494	0.000527192	0.000305123	0.000540608	0.000346424	0.00131468	0.000815819	0.000373201	0.000980419	9.67e-05	0.000124251	0.000496757	0.00170813	0.00170522	0.00142814	0.00071356	0.000548591	0.000712661	0.00209248	0.000737977	0.000122981	0.000259559	0.000150249
	Arg3_CCG	-	1	0.306814	0.0179439	0.00149309	0.00334821	0.00518135	0.0062523	0.00293363	0.00691915	0.0364912	0.00938478	0.00793103	0.00650908	0.0128509	0.00571621	0.00201342	0.00930851	-	0.00232173	0.00165563	0	0.00165289	-	0.00427913	0.000986518	0	0.000328731	0	0.000985222	0.000656383	0	0.00131105	0.000655093	0.000981675	0.00228534	0.000978474	0.00422215	0.0153502	0.0129419	0.0015758	0.0115265	0.0219378	0.259977	0.00157587	0.00448229	0.00290503	0.00245207
	Pro1_CGG	-	1	0.807141	0.0181155	0.00143155	0.0027255	0.00129618	0.00232769	0.00367197	0.00912805	0.00343511	0.00260136	0.00517579	0.00144964	0.00151038	0.0009431	0.00150669	0.00219243	0.00225	0.00205826	0.000996947	0.000995954	-	-	0.00136756	0.0012417	0.000744463	0.000124062	6.2e-05	6.2e-05	0.000186035	0.00092931	0.000185828	0.000990099	0.00105087	0.000556036	0.000308814	0.00117212	0.00503315	0.00464321	0.000366435	0.00243694	0.0125729	0.580344	0.00382265	0.000678562	0.000929018	0.000451751
	Pro2_GGG	-	1	0.831155	0.00708988	0.00174216	0.00130492	0.00141166	0.00303129	0.00323729	0.00621984	0.0178007	0.0048218	0.00417537	0.00239508	0.00176715	0.000934676	0.00134827	0.00124301	0.0016546	0.00123941	0.000825593	0.00185414	-	-	0.00195333	0.000616459	0.000205444	0.000102712	0.000102701	0.00010269	0	0.00112832	0.000819924	0.000307377	0.000102449	0.00184068	0.000408873	0.00163282	0.00101947	0.000611309	0.000305561	0.00294506	0.00293641	0.0324287	0.00127202	0.00107516	0.000195446	0
	Pro3_TGG	-	1	0.775659	0.0126769	0.00163834	0.00257374	0.000857178	0.00232123	0.0019509	0.00682194	0.0272891	0.00566119	0.0041989	0.00182397	0.00321071	0.00112056	0.00173578	0.00418683	0.00333065	0.00206304	0.000916065	0.000572213	-	-	0.000914704	0.000875823	0.000532826	0.000456499	0.000152143	0.000304194	0.000228094	0.000342023	0.000721528	0.000379607	0.000417394	0.000379305	0.000303352	0.00298665	0.0196071	0.0211515	0.00195532	0.00263633	0.0084154	0.540178	0.00573019	0.000965014	0.000996732	0.000653168
	Gln2_CTG	-	1	0.11447	0.0111743	0.00211594	0.00100658	0.00120643	0.00190655	0.00310103	0.0111774	0.00837012	0.00150175	0.00247501	0.00237167	0.00142746	0.00129601	0.0005505	-	-	0.00313125	0.000193648	0.000419395	-	-	0.00161046	0.00135096	0.00144537	0.000192678	0.000192641	0.000192604	0.000288823	0.000833681	0.000352587	6.41e-05	0	0.000128189	0.000448459	0.000608253	0.00198089	0.000542853	0.000574456	0.000446599	0.000510139	0.000860119	0.000541263	0.000350107	6.37e-05	0.000222731
	His_GTG	1	0.063593	0.00323632	0.00253796	0.00188876	0.0005996	0.00219371	0.00185787	0.00295499	0.0107764	0.00570449	0.00494248	0.00208917	0.00195611	0.0122511	0.0018015	0.000952825	0.00670915	-	0.0173803	0.00154757	0.000804091	-	-	0.000968094	0.0011727	0.000472969	0.000123368	0.000102796	0.00020555	0.000287687	0.00125192	0.00108655	0.000491783	0.000143416	0.000225317	0.00102312	0.00069524	0.00230532	0.00189371	0.00119994	0.000670704	0.00103547	0.00107492	0.000689096	0.000243151	0.000162075	0.000162048
	Gln1_TTG	-	1	0.118888	0.0122805	0.00184186	0.0011736	0.00120386	0.00173941	0.00258659	0.00804155	0.00957605	0.00201033	0.00256046	0.00292209	0.00202597	0.00150187	0.000551403	-	-	0.00414887	0.000274482	0.000609589	-	-	0.00149127	0.00121588	0.000820046	0.000364332	0.000121429	0.000242799	0.000212404	0.00103061	0.000545322	0.000393689	0.000696042	0.00184262	0.00412129	0.00929844	0.0445628	0.0103979	0.0145507	0.00185704	0.001605	0.00220891	0.00132359	0.000578736	8.27e-05	5.51e-05
	fMet1_CAT	-	1	0.558381	0.0135676	0.00363486	0.00163847	0.00343501	0.0045871	0.00424394	0.00360748	0.0135742	0.00168216	0.0039836	0.00321168	0.00221406	0.00102441	0.000756095	0.00118508	0.000673416	0.0003598	0.000174066	0.000336415	-	-	0.000544928	0.000741479	0.00046321	0.000127366	0.000381953	0.000717095	8.1e-05	0.000393059	0.000693153	8.09e-05	1.16e-05	0.00012705	9.24e-05	0.00103833	0.002635	0.000827786	0.00206519	0.000355545	0.000286648	0.00058442	0.000137492	0.000137473	4.58e-05	0.000114542
	fMet2_CAT	-	1	0.551661	0.0234234	0.00179856	0.00358423	0	0.00534759	0.0035524	0.00353982	0.0241796	0	0.00515464	0.00342466	0.00848896	0	0	0.00169491	0.00169205	0.00337268	0.0016835	0	-	-	0.00168067	0	0	0	0	0	0	0	0	0	0	0	0	0.0066778	0.00498339	0	0	0	0	0	0	0	0	0
	Ile2_CAT	-	1	0.0938124	0.00199203	0.00198807	0	0.00592885	0.00197239	0.0019685	0.0230769	0.0188679	0.0130354	0.00739372	0.0163636	0.00900901	0.00359066	0.00179211	-	-	0.00178891	0	0	0.00533808	-	0.00881834	0.00351494	0.00175439	0	0.00175131	0	0	0.00174825	0	0	0	0	0.00866551	0.0269815	0.371156	0.809802	0.58604	0.0113092	0.00386481	0.00572316	0.00358452	0.000162906	0.00048848	0.000813471
	Met_CAT	-	1	0.228744	0.00561097	0.00315518	0.00176569	0.00361371	0.00651897	0.00183893	0.00511329	0.019863	0.00576	0.00255346	0.0021385	0.0128902	0.00179332	0.00138789	0.00334657	-	0.0137306	0.00267732	0.000701754	0.00292999	-	0.0061283	0.00186543	0.000433633	8.67e-05	0.000303424	0.000389965	0.000389813	0.00310881	0.000862813	0.00647208	0.000685313	0.000299735	0.000812904	0.000769527	0.00140881	0.00153453	0.00305966	0.00182397	0.00207416	0.0037112	0.00042155	0.000631925	0.000968013	0.000462749
	Ile1_GAT	-	1	0.478437	0.00934023	0.00121127	0.00159124	0.00222279	0.00249176	0.00194948	0.00240733	0.00200384	0.00108991	0.00113055	0.00103526	0.00150357	0.00143885	0.00339786	0.000737218	-	0.00225846	0.00151026	0.000299893	0.00171369	-	0.00392806	0.00119139	0.000338816	7.19e-05	0.000195024	0.000153942	0.000112878	0.000215449	0.000112841	0.000328158	0.000348546	0.000307446	0.00029711	0.000430112	0.000562925	0.0013492	0.00260979	0.00131336	0.00146393	0.000822786	6.09e-05	0.000121872	0.000172622	0.000192893
	Arg5_CCT	-	1	0.0688506	0.00607064	0.0092947	0	0.00218221	0.00326264	0.0027115	0.012848	0.0316226	0.00771605	0.0035879	0.00459184	0.00406504	0.00101523	0.0010142	-	-	0.0040404	0.00100908	0	0.00100807	-	0.00150981	0.000503018	0.00300903	0.001002	0.000500751	0.001999	0	0	0	0	0	0	0	0.00249252	0.0171485	0.0092233	0.00290416	0.0052961	0.00288046	0.000959233	0.000479386	0	0.000479157	0.000957396
	Ser3_GCT	-	1	0.181239	0.00647959	0.00339872	0.0022768	0.00164434	0.0018826	0.00336765	0.00678517	0.00871542	0.00151343	0.00475406	0.00253533	0.00206157	0.00350173	0.00325763	-	-	0.00453998	0.00180347	0.000877841	0.00779316	0.00813895	0.00551662	0.00472547	0.00390012	0.000806271	0.00134198	0.00214257	0.00107014	0.00111349	0.00102336	0.000355824	0.000977561	0.0018185	0.00327144	0.0151515	0.0374654	0.0950738	0.0180606	0.0107566	0.00432805	0.00292569	0.000329032	0.000109665	0.00025582	0.001569
	Arg4_TCT	-	1	0.114636	0.00963941	0.00213751	0.00106762	0.00283889	0.0038883	0.00910683	0.0185631	0.024153	0.0194079	0.00621118	0.00778462	0.0105905	0.00288	0.00541057	0.015047	-	0.0160395	0.00613121	0.00366524	0.0114734	-	0.00868004	0.00268657	0.000894721	0.00119154	0.000892857	0.00029753	0	0.000891795	0.00148412	0	0.000593296	0.00413589	0.000295334	0.00499559	0.0497068	0.0107735	0.0038525	0.00383772	0.00355094	0.00163621	0.000272628	0.00108932	0	0
	Thr2_CGT	-	1	0.101705	0.0113485	0.00564222	0.00140857	0.00223214	0.00329598	0.00221985	0.0114597	0.00557666	0.00586534	0.00320359	0.0012798	0.0157456	0.00204274	0.000628141	0.00398843	-	0.0143375	0.00161613	0.000922651	-	-	0.00122869	0.00145694	0.000306631	0.00022992	0.000306466	0.000382936	0.000306255	0.00099434	0.00122231	0.00061078	0.000686656	0.000152567	0.000990703	0.00167377	0.00310959	0.00136333	0.00294517	0.00353676	0.00172776	0.00247284	0.000299648	0.000224685	0.000149768	0.000299446
	Thr1_GGT	-	1	0.180305	0.00914524	0.0031942	0.00239885	0.002001	0.00370238	0.00315838	0.00976913	0.00287326	0.00195838	0.00195456	0.00254143	0.0152559	0.00174538	0.00105979	0.00310136	-	0.00931866	0.000910778	0.000808925	-	-	0.00121192	0.00134476	0.000369673	0.000168005	0.000335897	0.000402914	0.000100718	0.00147503	0.000402118	0.000703211	0.00033475	0.000167347	0.000401472	0.00100267	0.000267308	0.000801282	0.00146686	0.010033	0.00174612	0.00910812	9.79e-05	6.53e-05	0.000163175	0.000391466
	Thr3_GGT	-	1	0.161984	0.00941667	0.00265957	0.00223899	0.00202756	0.00436699	0.00328502	0.0048627	0.00187617	0.00166945	0.00122006	0.00109685	0.00372349	0.000970403	0.000606134	0.00482567	-	0.015792	0.00122544	0.000711041	-	-	0.000592183	0.000710115	0.000354932	3.94e-05	0.000197138	0.000354722	3.94e-05	7.88e-05	0.000275786	0.000983981	0.000354108	0.000393298	0.000157295	0.00109985	0.000314144	0.000745537	0.00117578	0.00993365	0.00263168	0.00840433	7.67e-05	0	0.000230185	0.000191784
	Thr4_TGT	-	1	0.0934326	0.00950251	0.00337732	0.0012866	0.00118088	0.00315064	0.00272771	0.00627895	0.00954938	0.0066167	0.00279414	0.00432393	0.0104481	0.00192008	0.00654476	0.00650221	-	0.00497432	0.00133121	0.000551661	-	-	0.000648593	0.00119846	0.000388538	0.000226596	0.000226545	0.000226493	0.000161755	0.000549664	0.000484762	0.000258473	0.000355274	0.000613279	0.00128945	0.00148067	0.0135268	0.00209132	0.00196072	0.00468996	0.00141443	0.00360163	0.00131365	0.000343933	0.000468779	0.000343653
	Asn_GTT	-	1	0.447677	0.0482611	0.00309482	0.00152266	0.00389591	0.00163302	0.00198536	0.0051149	0.0187028	0.00409116	0.00325939	0.00708563	0.0198292	0.00166016	0.00251875	0.0081845	-	0.00408242	0.000412195	0.00049439	-	-	0.00107003	0.00112364	0.000369843	0.000150654	0.000219085	0.000574768	0.000191553	0.000341941	0.000601454	0.000218663	8.2e-05	0.000177617	0.00079182	0.000423035	0.0117863	0.0136997	0.0140062	0.00302028	0.00142312	0.00212364	0.000989184	0.000312276	0.000195135	0.000156083
	Lys_TTT	-	1	0.105287	0.00531064	0.00120914	0.00265077	0.00455261	0.00219221	0.00467884	0.00912738	0.0120344	0.00947738	0.00327199	0.00201781	0.0138647	0.00179405	0.00121591	0.00745281	-	0.0214946	0.00229438	0.00382992	-	-	0.00265944	0.00174253	0.00105466	0.000317321	0.000756902	0.000439628	0.000582423	0.0017544	0.0051549	0.0229715	0.000911288	0.000969779	0.00196537	0.000700722	0.00885267	0.0137477	0.0233667	0.00833442	0.00267442	0.00338974	0.0018817	0.00077803	0.000518418	0.000601373
Figure 3C	s4U	IAA	IAA-		s2C	IAA	IAA-		s2U	IAA	IAA-
	Leu5_CAA	0.0294118	0.00671785		Arg2_ACG	0.0654059	0.00170522		Glu_TTC	0.247343	0.0152999
	Phe_GAA	0.101695	0.0153551		Arg3_CCG	0.243902	0.0153502		Gln1_TTG	0.0352066	0.0145507
	Leu4_TAA	0.0412088	0.0131332		Arg5_CCT	0.148281	0.0171485		Lys_TTT	0.151022	0.0233667
	Trp_CCA	0.0596896	0.0054716		Ser3_GCT	0.110314	0.0374654
	Cys_GCA	0.06745	0.023399		Arg4_TCT	0.267463	0.0497068
	Ser2_CGA	0.01875	0.00595238
	Ser5_GGA	0.0106885	0.00611473
	Ser1_TGA	0.00800961	0.00153273
	Tyr1_GTA	0.176707	0.0275801
	Tyr2_GTA	0.163522	0.0324675
	Val2A_GAC	0.0148391	0.00450992
	Val2B_GAC	0.0130448	0.00490862
	Val1_TAC	0.0134286	0.00828512
	Gly1_CCC	0.022338	0.00812876
	Gly3_GCC	0.00487954	0.00222143
	Gly2_TCC	0.00709542	0.00288332
	Ala2_GGC	0.0102416	0.00674395
	Ala1B_TGC	0.0105984	0.00576343
	Asp_GTC	0.00903789	0.00284276
	Glu_TTC	0.00261946	0.00142142
	Leu1(P)_CAG	0.00311042	0.00100029
	Leu1_CAG	0.00326137	0.00107349
	Leu2_GAG	0.00706283	0.00247271
	Leu3_TAG	0.00696163	0.00255995
	Arg2_ACG	0.0523687	0.00532801
	Arg3_CCG	0.0824427	0.00938478
	Pro1_CGG	0.00741079	0.00260136
	Pro2_GGG	0.0218459	0.0048218
	Pro3_TGG	0.0487433	0.00566119
	Gln2_CTG	0.0025714	0.00150175
	His_GTG	0.0106417	0.00494248
	Gln1_TTG	0.0037762	0.00201033
	fMet1_CAT	0.0026812	0.00168216
	fMet2_CAT	0.00537634	0
	Ile2_CAT	0.0703518	0.0130354
	Met_CAT	0.0283634	0.00576
	Ile1_GAT	0.00282555	0.00108991
	Arg5_CCT	0.0110092	0.00771605
	Ser3_GCT	0.00992846	0.00151343
	Arg4_TCT	0.0241785	0.0194079
	Thr2_CGT	0.0114483	0.00586534
	Thr1_GGT	0.00631893	0.00195838
	Thr3_GGT	0.00421917	0.00166945
	Thr4_TGT	0.0106851	0.0066167
	Asn_GTT	0.0139797	0.00409116
	Lys_TTT	0.017133	0.00947738
	Tyr1_GTA	0.0777778	0.0044287
	Tyr2_GTA	0.0610236	0.00323625
[truncated: 50 more columns]
