# Supplementary material for: A tRNA modification in Mycobacterium tuberculosis facilitates optimal intracellular growth
Source: eLife. 2023 Sep 27;12:RP87146. doi: 10.7554/eLife.87146 (PMC10531406; doi:10.7554/eLife.87146)
Supplement: Figure 5—figure supplement 1—source data 1. [file elife-87146-fig5-figsupp1-data1.xlsx]

## Sheet: Figure5-figure_supplement_1
Figure5-figure_supplement_1A	Species	-1	1	2	3	4	5	6	7	8	9	10	11	12	13	14	15	16	17	17A	18	19	20	20A	20B	21	22	23	24	25	26	27	28	29	30	31	32	33	34	35	36	37	38	39	40	41	42	43	44
E. coli CMC+	Leu5_CAA	-	0	-0.00477783	-0.050152	-0.0138461	-0.0141615	0.0741098	-0.0140887	-0.00539722	0.00548409	0.0112108	-0.00454518	-0.00657817	0.0107235	-0.00641026	0.0123418	0.0102404	-0.0514645	-	0.0313439	0.0228234	-0.00799397	8.92e-05	-	-0.0234293	-0.00112577	-0.0111396	-0.00854831	-0.000923548	0.00800436	-0.00796374	-0.00422387	0.00277389	-0.00399636	0.0041469	-0.00353436	0.00212546	0.0997799	0.071356	0.0241765	0.0321984	-0.0146816	0.0119296	-0.00828944	0.0614777	0.00959926	0.000780335	-0.00180059
Termination	Phe_GAA	-	0	-0.00887574	-0.0599181	0.051096	-0.0235086	-0.0262009	0.0484848	0.0374536	0.0632119	0.0308772	-0.00436476	-0.0074359	0.0160839	-0.00567768	0.0528945	-0.00584795	0.0613155	-	-0.00675105	-0.00408562	-0.0135058	-	-	-0.00237726	0.0125858	0.0341959	0.0112215	0.0127679	0.0318151	0.010291	-0.00729927	0.0113621	-0.00181159	0	-0.00540541	0.00407341	0.0069803	-0.000658407	-0.00731355	0.0542478	0.0600094	0.0702978	-0.0179038	0.00115335	-0.000860215	-0.00107027	0.00151791
	Leu4_TAA	-	0	0.0192308	-0.0658683	0.0223529	0.0133006	-0.0215774	0.0563574	0.00713244	-0.00126984	0.0765901	-0.0211864	0.00424608	0.0151391	-0.0116279	0.011233	-0.0150943	-0.0920271	-	-0.0590312	-0.020979	0.00542841	-0.0231563	-	0.00727935	-0.0105042	0.00729167	-0.00900563	-0.0120482	0.00736716	-0.0118726	0.0159786	-0.000767916	0.00811783	0	-0.00714286	0.0209872	0.0359895	0.105944	0.243548	0.063445	0.0198617	0.00269055	-0.0302032	0.0113646	0.00211195	0.00133091	-0.00338221
	Trp_CCA	-	0	-0.0742377	0.024072	0.0295827	-0.000209125	0.000858036	0.00349038	-0.00324502	0.020194	-0.00204757	0.0156022	0.000456947	-0.0063131	0.0283445	0.0268713	0.00549892	0.0154378	-	0.0471701	0.0308202	0.0175392	-	-	0.0099247	0.0136607	0.0206385	0.00896602	0.00257624	-0.000400936	0.00159976	0.000543923	0.00570496	0.00544709	-0.000633714	0.00347597	0.00880066	-0.00287848	0.00364744	0.00182237	0.00281855	0.0291636	-0.00391174	0.0354139	0.00405222	0.0032577	0.00264824	0.000359364
	Cys_GCA	-	0	0.0172269	0.0080323	0.0102069	-0.00560085	0.0468694	0.000520969	-0.0113604	-0.0351994	-0.00661474	0.0145357	-0.00251535	-0.00882158	-0.0137944	0.00364866	0.0197349	-	-	0.0134998	-0.002292	0.00214504	-	-	0.0131539	0.0155564	0.0360167	-0.0018829	0.00595267	-0.000895052	-0.00158673	0.00860753	0.00584718	0.00481497	0.0018153	0.000456436	0.0153854	0.0675664	0.0219589	0.015387	0.00672847	0.012874	0.00473698	0.0127757	0.0519545	0.00886544	0.000888851	0.00163082
	Ser2_CGA	-	0	0.0280621	0.0720149	0.0446413	-0.0161943	-0.0389105	-0.0153257	-0.0150943	0.00530303	-0.00362319	0.0626374	-0.022228	0.0172678	-0.00187362	0.00446183	0.00745548	-	-	0.00596285	0.0128519	0.0247632	-0.0147929	-0.0637119	0.010829	0.00511283	0.00738979	0.118801	-0.00057807	-0.0173697	0.00207675	-0.00973236	-0.0143885	0.00674638	0.00446849	-0.00466201	0.013234	0.0083106	-0.000391696	-0.00448431	0.0283923	-0.0170591	0.0261505	-0.0145629	-0.0138483	-0.00974359	-0.00297537	0.00495528
	Ser5_GGA	-	0	0.0827609	0.0271931	0.00522687	-0.00268123	0.00916871	0.0057865	-0.0034282	0.0148722	0.00267907	0.00973168	0.0125638	0.0173823	0.0219435	0.027657	0.00133422	-	-	0.00669725	0.000467743	-0.000244243	0.00470538	0.0251007	0.00885923	0.00438502	0.000386081	0.00496602	-0.00183819	-0.000844926	-0.000545963	0.000773102	0.00121851	0.00538073	0.00236365	-0.00376037	0.00311974	0.00683114	0.009649	0.000524622	-0.0022817	0.000630092	0.00573799	0.000388	0.00470063	0.00597509	0.00647098	0.00661161
	Ser1_TGA	-	0	-0.0218777	0.0184972	0.0411508	0.0253312	0.0480294	0.0291174	0.0113797	0.0347021	0.0180386	0.0121027	0.0168799	0.00925735	-0.00469208	-0.00558133	-0.00229533	-	-	0.0321306	-0.00135638	-0.00296296	0.00167048	0.0593318	-0.00138866	0.00628295	0.00527736	-0.00614327	0.00391848	-0.0001248	0.00535058	-0.000191014	-0.0013514	-0.000333551	0.00116912	0.00390024	0.00578082	0.00485038	0.00617612	0.00903932	0.00160556	0.0328548	0.0131321	0.0104034	0.000829747	0.00232577	0.0004618	-0.00117961
	Tyr1_GTA	-	0	0.0100839	0.0460779	-0.0153941	0.0386682	0.0130105	0.0223552	-0.00382409	0.0298902	0.0527228	0.0684615	0.0163225	0.0496538	-0.013504	0.0217169	-0.00404313	-	-	-0.0189702	0.016779	0.00356693	0.0143428	0.00184273	-0.00232095	-0.00222912	0.0434814	-0.0182341	-0.00266335	0.00589177	0.000834324	-0.00495859	0.0269482	0.0128291	-0.00880282	0.0128404	-0.00837934	0.0123755	0.00913589	0.013018	-0.00153812	0.00746636	-0.00792912	-0.00135182	0.0538826	0.00227944	0.00135456	-0.000242953
	Tyr2_GTA	-	0	-0.0233224	0.0414815	0.0578471	-0.00787879	0.0128427	-0.00212454	-0.000693167	0.0116324	-0.0221533	0.0741102	0.0379938	0.0210624	0.0151896	0.00426118	0.00199528	-	-	0.0508466	0.00530278	-0.00328947	0.0264067	-0.00947881	0.0038813	-0.00654532	0.0437182	0.00203715	0.00635708	-0.00628013	0.0138713	-0.00597854	0.00735768	0.0104582	-0.00399095	-0.000715759	0.00940485	0.00283168	0.00851107	0.0200401	0.0429329	0.0523319	0.0607235	-0.00648158	0.0407081	0.00225146	0.000735122	0.000730744
	Val2A_GAC	-	0	0.0299928	-0.00931779	0.0154546	0.0370697	0.0359651	0.0404187	0.00917605	0.00692891	0.00739733	-0.00376981	0.00335419	0.0126638	0.00699287	0.0105556	-0.00903809	0.00966568	-	0.0930749	0.0369166	-0.00839094	0.0104489	-	0.0499175	0.0641445	0.0066451	0.000658569	-0.00157539	0.000732856	0.00308391	0.00288851	0.00112317	0.0025657	0.0020396	0.000168654	0.00660738	0.00120464	-0.00566016	0.00953613	-0.00396412	0.00531135	0.0157781	0.0138424	0.0054782	0.00561086	0.000981632	0.000924724
	Val2B_GAC	-	0	0.0178374	-0.000214475	-0.00319132	-0.017017	0.0217769	0.0229377	0.00927451	0.0240176	0.00232143	-0.00126923	0.00394612	-0.00429522	0.00843137	-0.00169275	-0.000840336	-0.0028601	-	0.057894	0.106053	0.000638758	0.0286089	-	0.111905	0.0298834	0.0134717	0.00728206	0.000551547	0.000150089	-0.000755908	0.00146285	-0.00162159	-0.00226676	0.00370124	0.00439585	0.00571367	-0.00106588	0.00271676	0.00754635	-0.0101598	0.00347386	0.0155718	0.00838007	0.00198915	0.00160946	-0.000151862	0.000689321
	Val1_TAC	-	0	0.0323988	0.0070311	0.00507355	0.00677966	0.00778265	0.00107037	0.00508584	0.0102827	0.00888894	0.00480067	0.0033263	0.00266276	0.00794634	0.00435698	0.00110337	0.00187527	-	0.0132594	0.00725976	0.00499612	-	-	0.00425996	0.00779995	0.00173138	0.00149854	0.00333078	0.00243956	0.00332217	0.000917416	0.000396053	0.000795352	0.000799581	0.000603741	0.00121887	0.00283403	0.00641453	0.0103216	0.0153702	0.00339286	0.00373849	0.00520994	0.0024824	0.00161395	0.00153036	0.000860324
	Gly1_CCC	-	0	0.0317337	-0.00801449	0.00518099	-0.00170235	0.0150973	-0.0135531	-0.00893345	-0.00310445	0.00478729	-0.00408747	0.00527047	0.0137424	0.00425699	0.00305487	0.00834563	-	-	0.0208944	0.0023372	0.00850485	-	-	0.0157474	0.0128377	0.0105305	0.00403862	0.0101669	0.0172172	0.00334257	0.005679	0.00777157	0.00402584	0.00215556	0.00254454	-0.00285672	0.000151178	0.000567218	-0.00116967	0.00563679	-0.00322266	0.0152675	0.000640334	0.00257452	0.00183063	0.00413724	0.00165487
	Gly3_GCC	-	0	0.0435861	0.0302188	0.0216267	0.0188627	0.0162184	0.00638036	0.0105141	0.0146417	0.00740773	0.00648082	0.00255657	0.00606418	0.014577	0.005595	0.00328892	0.0144807	-	0.0626158	0.0246246	0.0131307	-	-	0.0178895	0.0213953	0.01309	0.00594942	0.00358401	0.00461875	0.00365795	0.00523122	0.00163078	0.000684374	0.000727604	0.00238443	0.00283044	0.00366609	-0.00273013	0.00040435	-0.00104739	0.00118503	0.00143267	0.00153447	0.000798326	0.00505964	0.00625154	0.00348548
	Gly2_TCC	-	0	0.0397085	0.0159333	0.0352117	0.0104147	0.0120454	0.00708406	0.00191366	0.0096393	0.0117955	-0.00212183	0.00131589	0.00184946	-0.00350104	0.0102679	0.0115308	-	-	0.00606669	-0.00148779	0.00192645	0.00315801	-	0.00661227	0.0069847	0.0129666	0.00979127	0.00615042	0.00535678	0.000934357	0.00533281	0.00698171	0.00607305	-0.00325241	0.00224535	0.000392667	0.00284065	0.0392732	0.0712638	0.0186827	0.00910301	0.00838018	0.00419917	0.00598318	0.00432155	0.00135637	0.00246258
	Ala2_GGC	-	0	0.029915	0.0089337	0.00518896	0.00011592	0.00567566	0.00458293	0.00251403	0.00721434	0.00354998	0.00104098	-0.000371523	0.00185258	0.0030383	0.00390377	-0.00126723	0.00148008	-	0.0181846	0.0108675	0.00550799	-	-	0.00421391	0.00357612	0.00196913	0.00117847	0.000106153	0.00596927	0.00109152	6.31e-05	0.00314127	0.00225545	0.00340733	0.000356328	0.00119882	-0.00211664	0.00222214	0.000974083	0.00167922	0.00323824	0.0029497	0.00244243	0.00201686	0.00377626	0.00212159	0.00118654
	Ala1B_TGC	-	0	0.0194055	0.00332657	-0.00136992	0.00262099	0.00303575	0.00165079	0.00289329	0.0102551	0.00465289	0.0024993	0.00134844	0.00239612	0.00456508	0.00198684	5.52e-05	0.0030661	-	0.0127055	0.0106579	0.00732403	-	-	0.00523101	0.00340254	0.00413265	0.00277555	0.00286346	0.00230046	0.00143908	0.00208519	0.00282693	0.00281086	0.0015746	0.00206543	0.002401	0.00646612	0.0130486	0.00579346	0.00234133	0.00511335	0.00288152	0.000838969	0.000687377	0.00158056	0.00487002	0.000465482
	Asp_GTC	-	0	0.027116	0.00938413	0.0125329	0.00495818	0.0159548	0.00592754	0.00200922	0.0083929	-0.00444872	0.0071387	0.004186	0.011094	0.0146596	0.00293592	0.000208647	0.00735938	-	0.0196476	0.00700548	0.000570469	0.0121522	-	0.0771246	0.0451021	0.0125614	0.00289168	0.00154713	0.00219319	0.00269211	0.00425832	0.00144455	0.00159096	0.00108206	0.0018974	-0.000669376	0.00116233	0.00261982	0.00571367	0.00854388	0.00521036	0.00355942	0.00208035	0.00324074	0.00442114	0.00281849	0.000616703
	Glu_TTC	-	0	0.00958822	0.00265627	0.00360605	-0.00107156	0.000335622	-2.76e-05	0.000439337	-0.00228333	0.0152851	-0.00093341	-0.00185452	0.011557	0.016076	0.0412443	0.0356992	-	-	0.00493344	-0.000491977	-0.000515584	0.000157212	0.000689301	0.000223775	0.00314212	0.000117944	0.00132126	0.000306059	0.0054123	0.000561468	-0.000133705	0.000646022	0.000232444	0.000305875	0.00087084	0.00148045	0.0107198	0.0446285	0.086736	0.0793241	0.0167914	0.011455	0.00202701	0.000970506	0.00460655	0.000606873	0.000133871
	Leu1(P)_CAG	-	0	-0.00574716	0.0213546	0.00964848	0.0133648	0.0150528	0.00910637	-0.00384171	-0.0150185	0.00328554	0.00205259	-0.00161319	0.00178638	-0.00168634	0.000676416	-0.00832043	0.0123811	-	0.0817412	0.0108503	0.00197962	0.0184731	-	-0.000493263	0.00154795	0.00333323	-0.00371885	0.00153739	-0.00476607	-0.000475425	0.00375865	-0.00278895	-6e-05	0.00530453	-0.00294376	-0.00196847	0.00334445	0.00212693	-0.00580172	-0.00166525	0.00345674	0.00456655	0.041954	0.0314384	0.0232476	0.049348	0.00434901
	Leu1_CAG	-	0	0.0279909	0.0293575	0.0159885	0.00908114	0.0142248	0.0107016	0.0010343	0.0143507	0.00194282	0.00167324	0.00397434	0.00274255	0.00137444	0.000579477	0.00564985	0.0325098	-	0.0669947	0.0155732	0.00308561	0.0120807	-	0.00673356	0.00550962	-0.000759504	-0.00158258	-0.000309681	-0.00071927	-0.000372494	-0.000233876	-4.37e-05	0.00224355	-1.56e-05	0.00169647	0.000415959	0.000850191	-5.58e-05	0.00279242	-3.94e-05	0.00277063	0.0135445	0.0373226	0.0361797	0.0339845	0.0617243	0.00743372
	Leu2_GAG	-	0	0.035036	0.00418783	0.00693486	0.00143158	0.0314997	0.000730378	0.00692368	0.0140618	0.000293626	0.00595952	-0.00350464	0.01735	0.00984116	0.00283968	0.00116092	0.0230003	-	0.0798013	0.0119452	0.00332899	0.008657	-	0.0145107	-0.00172326	-0.00126577	-0.00113579	0.00383932	-0.00161511	0.000919601	0.00208986	0.00353207	0.00300906	0.00605943	0.00322694	-0.001194	0.00705076	0.00464111	0.00219668	-0.000249621	0.0119957	0.0241713	0.0190136	0.0127321	0.00469267	0.00419042	0.00503952
	Leu3_TAG	-	0	0.0350453	0.00611326	0.013534	-0.00260148	-0.00289272	-0.00542753	-0.0163964	0.00753658	0.00488135	-0.000386831	0.0120706	0.00195745	-0.00656077	0.00709284	-0.00743689	0.0122615	-	0.0792696	0.00347359	-0.00674383	0.0182909	-	-0.00242987	0.00628268	0.00360167	-0.00335891	0.00947772	0.00772856	-0.00264961	0.00755726	0.00166563	0.0099294	0.00287329	0.00270911	0.0027054	0.0162157	0.0643253	0.0191421	0.0322815	0.00612898	0.0143591	0.111329	0.088259	0.0212271	0.00493641	0.00191571
	Arg2_ACG	-	0	-0.00772349	0.0186582	0.00949646	0.00703231	0.0214994	0.0206432	-0.00483025	0.027149	0.0258951	0.0107064	0.0179878	0.0140044	0.0308869	0.0168592	0.00231616	0.00578445	-	0.0357025	0.00508961	0.00120172	0.0060075	-	0.0305604	0.0160472	0.0130554	0.00361441	0.00376137	0.00337201	0.00631568	0.0152566	0.0105588	0.0113205	0.00322088	0.00210421	0.00473557	0.0102636	0.0139374	0.0203389	0.0108011	0.00874408	0.00103214	0.00487991	0.00304578	0.000499833	0.00312608	0.00155506
	Arg3_CCG	-	0	0.0126218	-0.00569444	-0.0111248	-0.00850045	-0.00470995	-0.00851393	-0.019057	-0.039582	0.00674203	-0.0160671	0.0103616	0.0119125	0.0088683	0.0469862	-0.00464396	-0.0129151	-	-0.0081573	0.0272485	0.0240997	0.00826097	-	-0.000283462	0.00584076	0.00582703	-0.00218992	-0.0101144	0.0243702	0.0112271	0.0117514	0.0191239	0.000889614	0.0109315	-0.00299461	-0.00821744	-0.00292178	0.0882684	0.0227609	-0.00762794	0.012001	-0.000302634	-0.00118669	0.00102237	0.0103599	0.00741172	-0.00383836
	Pro1_CGG	-	0	0.0128025	0.0133686	0.00434377	0.00678346	-0.000209816	-0.000557181	0.00531104	0.0207464	0.00326575	0.00362952	0.00936607	0.00367508	0.00179537	0.00183799	0.0023321	0.00445675	0.00637125	0.0142779	0.00754309	0.000573524	-	-	0.0146732	-0.000140784	0.01413	0.00507051	0.00113124	-0.00107919	0.00185972	-0.000565752	0.000108188	0.0162473	0.0077475	0.000432721	0.00947986	0.00658107	0.0185461	0.0239477	-0.00135468	0.0265491	0.0169319	0.0343166	0.00916567	0.0027504	0.00480421	0.00159537
	Pro2_GGG	-	0	-0.0116608	0.0127392	0.00183399	0.00506702	0.00890834	0.00835404	0.00570038	0.00200659	-0.00105228	0.0103283	0.005682	-0.000725678	-0.00186724	-0.00042741	7.82e-05	0.0091839	0.00593258	0.0125877	0.0165748	0.00315748	-	-	0.00871428	0.00914737	0.00923299	0.00454902	0.000419006	-0.000995743	0.00116136	-0.000658565	0.0106572	0.0048961	0.00186403	0.00172	0.00755866	0.00533299	-0.00498218	0.00425538	0.00253047	0.00599063	0.0110702	0.0166708	0.019341	0.0984667	0.02737	0.0064333
	Pro3_TGG	-	0	-0.00360024	0.0143197	0.00423544	0.00477553	0.00221708	0.0137765	0.0032881	0.007343	0.00522571	0.00603081	0.0003136	0.00357266	0.00112179	-0.000324962	0.00121414	0.00109265	0.00572266	0.00271456	0.0117049	0.00583049	-	-	0.00974995	0.0041747	0.010067	0.00264786	0.000103051	-0.000641119	0.00329357	-0.00190788	0.0013807	0.00104733	0.00741871	0.00629101	0.0019129	0.00869924	0.0232361	0.0197259	0.00609085	0.00451373	0.0318876	0.0544293	0.00454493	0.00602789	0.00823629	0.00518434
	Gln2_CTG	-	0	0.0720208	0.0200889	0.00284315	0.00438219	-0.00142529	-0.00648689	-0.00148842	-0.00604594	0.00308365	0.0012218	0.00276908	0.00465015	0.00738929	0.00113867	0.00341414	-	-	0.00878932	0.00335314	0.00405066	-	-	0.0102834	0.0108138	0.0139024	0.000741379	0.00334859	0.00415299	0.00317215	0.00283118	0.00484882	0.00340462	-0.000621447	0.00317828	0.00358543	0.00615115	0.00974382	0.000431552	-0.00145828	0.00397878	0.00842104	0.0422513	0.108243	0.00620084	0.00240255	3.39e-05
	His_GTG	0	0.033991	0.0139363	0.0154048	0.00786907	0.00528365	0.00642576	0.00824449	0.00325602	0.0148068	0.00793394	0.00565544	0.000177	0.00160164	0.00404284	0.00930209	0.00811755	0.0163028	-	0.0544144	0.02203	0.00689301	-	-	0.0121143	0.0179285	0.0122952	0.00229874	0.00372104	0.001817	0.00509608	0.00840205	0.00280254	0.00820391	0.0010511	0.00491357	-0.00348518	0.01258	0.0100133	0.00751314	-0.000608923	0.00335824	0.0089757	0.0705232	0.125312	0.00627973	0.00521276	0.00563944
	Gln1_TTG	-	0	0.0900927	0.0139217	0.00271476	0.00436105	0.00773376	-0.00143296	0.00517083	-0.00404681	0.00209777	-0.000457243	0.00588854	0.000148695	0.000857205	-0.000362736	-1.39e-06	-	-	0.00831119	0.00150944	-0.00206761	-	-	0.00565078	0.0110194	0.0100613	0.00265875	-5.28e-05	-0.0015192	0.00135213	-0.000725791	0.00868002	-0.000991104	0.000779276	0.000270294	-0.00263535	0.0192531	0.121582	0.0572234	0.0215412	0.00940683	0.0187763	0.0434735	0.0137846	0.00347386	0.00246245	0.000504947
	fMet1_CAT	-	0	0.029845	0.00294714	0.00501905	0.00135414	0.00162505	0.00308704	0.000860232	0.00736324	0.00135546	0.00363328	0.00250069	0.00141552	0.00174072	0.00634402	0.00221267	0.00194353	0.00356867	0.00575418	0.00511311	0.00151163	-	-	0.00598208	0.00715204	0.0053599	0.00122478	0.00564808	0.00855712	0.00150266	0.00413056	0.00662359	0.00243255	0.000903902	0.00231671	0.00218703	0.00102233	0.0085158	0.0041467	0.00598412	0.00489956	0.0024929	0.00193837	0.00193907	0.00333847	0.00216125	0.000995559
	fMet2_CAT	-	0	0.0117287	-0.012907	0.00543996	0.00536085	0.00311058	-0.00448332	-0.0036464	-0.0126859	-0.00190482	0.00675438	0.0115308	-0.000671379	0.00118131	0.00517659	0.00222005	0.00549165	-0.00131843	0.00633316	0.0217587	0.0114762	-	-	0.00802907	0.00799001	0.0139963	0.000592375	-0.0113151	0.0323304	0.0123666	-0.0013644	0.00928807	-0.00562801	0	0.00415723	0.000141773	0.0171025	0.0294206	0.00807261	-0.000158447	0.00259922	-0.00333778	-0.000667111	0.000591158	0.00382793	0.00128006	0.0019291
	Ile2_CAT	-	0	-0.113636	0	0.166667	-0.0222222	0	0	0	-0.0625	-0.0204082	0	-0.02	0	0.123249	-0.0192308	-0.0188679	-	-	-0.0185185	-0.0181818	-0.0178571	-0.0819672	-	0.177778	-0.0338785	0.0141807	0	-0.00884956	-0.0258621	0.0470085	0.044157	-0.00840336	0.05	0	0	0	0.0150987	-0.166084	-0.322807	-0.010907	0.00879152	-0.00177148	0.0289242	0.0482418	0.0069171	0.0204082	0.013913
	Met_CAT	-	0	-0.0470985	0.0188009	0.00703419	0.0532974	0.0336869	0.0520604	0.010825	0.0374316	-0.0284569	0.0195079	-0.00515668	0.0173982	0.0106939	0.0183427	0.00943164	0.025679	-	0.106633	0.0524623	0.01951	0.0302561	-	0.133478	0.0579542	0.0231384	0.00134578	-0.000117355	-0.00366205	-0.00520427	0.00830826	0.0100544	0.0131783	0.0157979	0.0115184	-0.00426279	0.0178654	0.0129092	0.00674387	0.0101068	-0.00502249	0.0102458	0.0427145	0.00732125	0.0327765	0.0242343	0.00832877
	Ile1_GAT	-	0	0.0246189	0.00493998	0.000165972	0.00709192	0.0130556	0.0169308	0.01085	0.0089561	0.00832128	0.00966809	0.00777234	0.00813505	0.011112	0.00810536	0.00153413	-8.99e-05	-	0.00857176	0.00627719	0.00626355	0.0200534	-	0.137581	0.0412787	0.00883286	0.00237368	0.00566512	0.00468439	0.00390753	0.00355896	9.93e-05	0.000855183	0.00124132	-0.000666145	0.00495745	0.00458494	0.00358195	0.00279728	0.0129316	0.00622853	0.0133039	0.00302935	0.00435223	0.00423921	0.00529946	0.00189517
	Arg5_CCT	-	0	0.0740593	-0.00523612	-0.0115553	-0.00899889	-0.00633369	0.013795	-0.0101097	0.00455182	-0.0274399	0.000709646	-0.00431186	-0.0267148	-0.00818354	0.00421407	-0.00718379	-	-	-0.00808731	0.00611504	-0.0040678	0.0151859	-	-0.00540761	-0.00715893	-0.00330164	0.00627198	0.00325597	0.00520796	-0.0017385	0.000996983	-0.00267809	0.00104824	0.00420867	0.000994025	-0.00476443	-0.000641957	0.0373333	0.00603711	0.00114562	0.00548385	0.0101025	0.00109662	0.0013808	0	-0.000838574	-0.000419111
	Ser3_GCT	-	0	-0.00248223	0.0249122	0.0130003	0.0141819	0.0249805	0.00174394	-0.00083621	0.0198907	0.0156089	0.00578601	0.00795541	0.0264136	0.0118664	0.0226595	0.0179485	-	-	0.0183665	0.0119333	0.000315541	-0.00130275	0.0200697	0.0106163	0.00246936	0.0076198	0.00630544	0.000559923	0.0097612	0.00138918	0.00247667	0.0022646	0.00217977	0.00672561	0.00219729	0.00584604	0.00962063	0.00826043	0.00443358	0.00789253	0.0146495	0.0134525	0.00270757	0.00305052	0.00509813	0.00175549	0.00363732
	Arg4_TCT	-	0	0.0573241	0.0366654	0.0135463	-0.0240175	-0.0170824	-0.0270341	0.00274018	-0.00110996	0.00260614	-0.00771114	0.00439957	0.00474648	0.0454219	-0.0373487	0.00429083	-0.014871	-	0.0339437	0.0139937	-0.00352775	-0.00971584	-	0.00750138	0.00655153	-0.00872028	-0.00018381	-0.00298722	-0.00491884	-0.00276203	-0.0029517	0.0036371	0.00147159	4.38e-05	0.0189734	-0.00708121	0.0033229	0.2471	0.0776885	0.0201758	0.0171784	0.019281	0.00722656	0.00860643	0.0591617	0.00478499	0.00229062
	Thr2_CGT	-	0	0.100064	0.0279455	0.0252132	-0.00175605	-0.0040596	0.00727552	0.00610446	0.00670705	-0.00463881	-0.00553821	0.00172263	0.00680405	0.00804049	-0.00222705	-0.00137174	0.0180548	-	0.0134013	0.0226903	0.0139665	-	-	0.000863109	0.0182507	0.00898715	-0.000847763	0.00290515	-0.00368072	-0.00193963	5.73e-05	0.00350219	0.00432736	0.000766233	0.00250657	0.00374426	-0.00680536	-0.00267536	0.000835383	-0.00258342	0.00477284	0.0107112	0.0516521	0.0103482	0.0157558	0.00136607	0.000406427
	Thr1_GGT	-	0	0.0485632	0.0294083	0.027955	0.0142469	0.0148397	0.00718516	0.00613997	0.0161022	0.00650341	0.00492495	0.00189877	0.00375069	0.00698383	0.00254593	0.00753164	0.0148398	-	0.0860156	0.0231409	-0.000795623	-	-	0.00316868	0.00707965	0.0108719	0.00375395	0.00206154	0.00473812	0.00184103	0.00478504	0.00168458	-0.00154997	0.00396883	0.000636527	0.0112361	0.0126434	0.00359603	0.00588798	0.00579271	0.0213692	0.0192214	0.00594339	0.00557852	0.0017819	0.00392737	0.00137886
	Thr3_GGT	-	0	0.0310688	0.0174699	0.0231417	0.00720583	0.00667134	0.0169219	0.00452119	0.0140279	0.00864879	0.0104366	0.00235739	-0.000522637	0.0117021	-0.00266601	-0.00111661	0.00592647	-	0.0526405	0.0185632	0.000965926	-	-	-0.00194995	0.0107029	0.0101794	0.00539673	-0.00206617	0.00269434	0.00404598	0.00630675	-0.000657408	0.00284035	0.000836357	0.006275	0.00682763	0.00719281	0.00246649	0.00181491	0.00478691	0.00405577	0.0146129	0.00732843	0.00626386	0.00420339	0.0045841	0.00280398
	Thr4_TGT	-	0	0.0353576	0.00228451	-0.00382048	-0.00393961	0.00159206	0.00219124	-0.00268534	0.00126594	0.00762758	-0.00129737	0.00106037	-0.000455311	-0.000526271	0.00375122	-0.00434499	-0.00162479	-	0.00544698	0.00659457	-0.00301362	-	-	-0.00160028	0.00354559	0.00540067	0.00155132	0.00148603	-0.000327257	-0.00214268	0.00211624	0.00299562	0.000269659	-0.000478943	-0.000539789	0.000365559	0.00110339	0.00364961	-0.000975512	-7.45e-05	0.00615533	0.00392171	0.00819233	0.0348167	0.0350348	0.00256278	0.00077613
	Asn_GTT	-	0	0.0366855	0.043089	0.00665993	0.00204892	0.00572088	0.000842338	-0.000845536	-0.00249925	-0.00263751	0.00260703	0.0012345	0.0022321	0.0064385	0.000658608	-0.000143819	-0.00138513	-	0.015444	0.00345192	-0.000994695	-	-	0.00280919	0.00456047	0.00287583	0.00117103	-0.00115989	0.0036429	0.0014656	0.00285477	0.00205603	0.00206918	0.000648067	0.00103846	0.00326038	6.51e-05	0.0143992	0.00989866	0.0128146	0.00988911	0.00683891	0.00519556	0.0610038	0.0168433	0.00145653	0.00121202
	Lys_TTT	-	0	0.032024	0.0144699	0.00421603	0.0149951	0.0312988	0.00177315	0.00665827	0.0205451	0.0108792	0.00329061	0.000667311	0.00368733	0.0168178	0.00502759	0.000589849	0.00886014	-	0.0556466	0.031512	0.00684926	-	-	0.0122047	0.0111683	0.0106379	0.00130694	0.00217085	0.00220877	0.00481308	0.00183008	0.00389345	0.00869663	0.00138838	-0.000198768	0.0081069	0.00513976	0.0271929	0.0772336	0.0737286	0.0494452	0.0189833	0.0214385	0.048635	0.0320862	0.00268086	0.00298435
Figure5-figure_supplement_1B	Species	-1	1	2	3	4	5	6	7	8	9	10	11	12	13	14	15	16	17	17A	18	19	20	20A	20B	21	22	23	24	25	26	27	28	29	30	31	32	33	34	35	36	37	38	39	40	41	42	43	44
E. coli CMC-	Leu5_CAA	-	1	0.43956	0.0714286	0.0546624	0.0341615	0.033033	0.0485714	0.0223464	0.151659	0.0298851	0.0180587	0.0199115	0.0152505	0.0192308	0.0126582	0.00210526	0.17103	-	0.226721	0.0159363	0.0156863	0.0578818	-	0.0447059	0.00816803	0.0250284	0.0222469	0.00772627	0.0119956	0.0275716	0.00422387	0.0227038	0.0348606	0.00198807	0.0156556	0.00389864	0.0172414	0.0160226	0.0221198	0.100332	0.15309	0.194114	0.908427	0.0272723	0.00566416	0.00289884	0.00862154
Termination	Phe_GAA	-	1	0.431953	0.163366	0.042654	0.0538117	0.0262009	0.00865801	0.0414938	0.110701	0.0491228	0.0239726	0.0266667	0.0384615	0.0574018	0.0264706	0.00584795	0.025641	-	0.133333	0.028777	0.0257009	-	-	0.0488889	0.0526316	0.0365112	0.0276134	0.015534	0.0301318	0.0238971	0.00729927	0.00544465	0.00181159	0	0.00540541	0.0124555	0.0327022	0.00853242	0.0151261	0.114583	0.303627	0.211601	0.926724	0.0208101	0.0105562	0.00133225	0.0031757
	Leu4_TAA	-	1	0.397436	0.0658683	0.0176471	0.0607735	0.0572917	0.0103093	0.0251256	0.115556	0.025974	0.0211864	0.0445344	0.0313725	0.0116279	0.0114943	0.0150943	0.261838	-	0.145238	0.020979	0.0115207	0.039823	-	0.0403397	0.0105042	0.00833333	0.0243902	0.0120482	0.0367505	0.0263653	0.0256881	0.0144665	0.00539568	0	0.00714286	0.0053286	0.0140105	0.0338409	0.0921659	0.402204	0.237929	0.174466	0.892217	0.0173764	0.00686638	0.00573949	0.010403
	Trp_CCA	-	1	0.677686	0.0404441	0.0262548	0.0152091	0.00904295	0.0206642	0.00805271	0.0256776	0.0416951	0.0101488	0.00805369	0.0312094	0.0375469	0.00683654	0.0128834	0.139842	-	0.198732	0.0740016	0.0188244	-	-	0.0472182	0.0403934	0.0306435	0.0127731	0.008994	0.0102209	0.00328623	0.0107282	0.0178799	0.00697527	0.000633714	0.00879397	0.00779059	0.005886	0.00676923	0.00702719	0.0244411	0.0907859	0.117014	0.738453	0.0240059	0.00961888	0.0126628	0.00107399
	Cys_GCA	-	1	0.134288	0.0597643	0.0630915	0.0261137	0.0461538	0.0222063	0.0464481	0.104587	0.0382353	0.0449438	0.0383576	0.0298742	0.034413	0.0198413	0.0127326	-	-	0.0358829	0.00842697	0.0069735	-	-	0.0414438	0.114444	0.12891	0.053368	0.0228935	0.0379321	0.0215504	0.0127069	0.0317597	0.020185	0.00971682	0.0077135	0.0162602	0.0191388	0.0115607	0.0170455	0.0246851	0.0776022	0.0881356	0.799737	0.0142206	0.00345949	0.000416632	0.000416458
	Ser2_CGA	-	1	0.433476	0.0210084	0.0205761	0.0161943	0.0389105	0.0153257	0.0150943	0.0363636	0.00362319	0.0142857	0.0410959	0.0363036	0.0194175	0.0127796	0.00949367	-	-	0.0424242	0.00302115	0.00600601	0.0147929	0.0637119	0.0190217	0.0238727	0.0207792	0.0153453	0.0126263	0.0173697	0.00982801	0.00973236	0.0143885	0.0165094	0.00702576	0.00466201	0.00923787	0.0136674	0.0112613	0.00448431	0.0132743	0.0850202	0.108303	0.698913	0.0346275	0.0225641	0.0181269	0.00997009
	Ser5_GGA	-	1	0.314154	0.034649	0.0387983	0.0272211	0.0320078	0.0272055	0.0234951	0.0458608	0.0277778	0.0188679	0.0281174	0.0380243	0.0257161	0.0285679	0.00663391	-	-	0.057434	0.00472514	0.00172573	0.0177421	0.0958414	0.0320443	0.0263842	0.0283496	0.021335	0.0178074	0.015495	0.0118121	0.00720987	0.00827016	0.0152698	0.00481216	0.0093669	0.0163705	0.0232222	0.0240747	0.0307821	0.0161519	0.00999408	0.00865992	0.00482033	0.00645817	0.00799021	0.00976549	0.00531764
	Ser1_TGA	-	1	0.416836	0.0218254	0.0194553	0.0181471	0.0131951	0.0345769	0.013465	0.034662	0.0261603	0.00420168	0.0197694	0.0357427	0.0194704	0.0153374	0.00229533	-	-	0.0231689	0.00594354	0.00296296	0.0784983	0.40568	0.0687571	0.0163508	0.0285199	0.0159858	0.00775467	0.0135605	0.00415512	0.0133242	0.0124831	0.00770003	0.00066912	0.0105925	0.0257981	0.0257619	0.0203139	0.00884686	0.0298905	0.133812	0.143014	0.76379	0.0299507	0.0192536	0.0107926	0.012538
	Tyr1_GTA	-	1	0.436725	0.0671296	0.0689655	0.043299	0.0338645	0.0364683	0.00382409	0.0386029	0.108197	0.0615385	0.0312966	0.0373027	0.0305981	0.0270636	0.00404313	-	-	0.114558	0.0117925	0.00352526	0.0329545	0.030837	0.0215517	0.021097	0.026694	0.0240481	0.0253906	0.0163305	0.0261927	0.0156538	0.0189702	0.0168739	0.00880282	0.0113142	0.0179487	0.010989	0.00921273	0.005	0.0990991	0.183323	0.264653	0.911284	0.0197608	0.0112042	0.00305338	0.00740428
	Tyr2_GTA	-	1	0.426307	0.0651852	0.0492958	0.0533333	0.0409207	0.0333745	0.0110024	0.04662	0.10251	0.044	0.0281827	0.0410065	0.0245455	0.0152193	0.00445633	-	-	0.0634391	0.0115512	0.00328947	0.0217216	0.0304212	0.0265755	0.0215453	0.0260492	0.0294944	0.0199587	0.0235215	0.027451	0.0141753	0.0127226	0.0168856	0.0117429	0.01221	0.0203349	0.0118203	0.00235849	0.00469484	0.0809061	0.169355	0.246455	0.9137	0.0213288	0.0112214	0.00311982	0.00706073
	Val2A_GAC	-	1	0.389125	0.0515713	0.0119427	0.00868193	0.0253846	0.0173847	0.0134228	0.0414582	0.0338398	0.00889802	0.0067981	0.0120886	0.0171617	0.0130293	0.00903809	0.0133758	-	0.176285	0.102214	0.0198523	0.0759386	-	0.446125	0.131185	0.0252151	0.00951437	0.0086461	0.0122283	0.00482905	0.00690581	0.0076147	0.00322581	0.0084666	0.0111628	0.0253853	0.0483175	0.0416736	0.0360274	0.0326908	0.0240783	0.0309173	0.0140906	0.0123544	0.00858792	0.00238764	0.000421171
	Val2B_GAC	-	1	0.48791	0.0441705	0.0086558	0.017017	0.0201079	0.0220624	0.0151157	0.0399093	0.02	0.0101188	0.00915432	0.00864304	0.0169924	0.00591216	0.00504202	0.0153082	-	0.133381	0.0752653	0.0182292	0.0752559	-	0.398733	0.134148	0.0272866	0.0104088	0.00867355	0.0107988	0.00529723	0.0039572	0.00611799	0.00406209	0.00519556	0.00616753	0.014976	0.026276	0.026647	0.030885	0.0278794	0.0249692	0.0280932	0.0133286	0.0152166	0.0139732	0.0108757	0.00596847
	Val1_TAC	-	1	0.217527	0.028102	0.0180257	0.0310139	0.00885305	0.0182805	0.0216034	0.037413	0.0286556	0.0114954	0.0110838	0.0114697	0.0190515	0.0132539	0.00291184	0.0160424	-	0.0476774	0.0251139	0.0237602	-	-	0.0173051	0.0156512	0.013266	0.00806267	0.00625155	0.00754928	0.00508864	0.00453083	0.00267631	0.00139439	0.002039	0.00358195	0.00327271	0.0124071	0.0122551	0.0257222	0.0175374	0.0103585	0.00686995	0.00468125	0.00164537	0.000725886	0.000524462	0.000724979
	Gly1_CCC	-	1	0.272414	0.0826414	0.0876623	0.0513347	0.0388158	0.0599876	0.0363528	0.0872994	0.0728694	0.0241142	0.0307656	0.0444394	0.0645918	0.0233188	0.0347669	-	-	0.0393822	0.0189394	0.0169428	-	-	0.0527337	0.0527898	0.0363812	0.0128714	0.0174863	0.0345191	0.0174763	0.0180337	0.0192555	0.016	0.00807462	0.0131886	0.0152868	0.0235139	0.0248615	0.0370876	0.027972	0.0284643	0.027898	0.00801988	0.00751121	0.00368592	0.00234009	0.000334187
	Gly3_GCC	-	1	0.302853	0.0473108	0.0280736	0.024387	0.0217126	0.0154321	0.0166134	0.0360333	0.0231942	0.00858958	0.00687183	0.0109275	0.0137533	0.00828104	0.00442175	0.0396954	-	0.257375	0.0664894	0.0253586	-	-	0.041328	0.0339921	0.0255241	0.0129919	0.0109903	0.0127179	0.0115998	0.0142577	0.00519598	0.00434999	0.00672798	0.00657643	0.0114265	0.0185326	0.0227762	0.0279465	0.0167401	0.00747328	0.0106675	0.00461662	0.00319424	0.00664184	0.0125068	0.0093646
	Gly2_TCC	-	1	0.276081	0.0940463	0.0777061	0.049857	0.0317858	0.0437634	0.0258017	0.0587487	0.0696148	0.0307644	0.0433004	0.0408612	0.0719361	0.0225694	0.0312001	-	-	0.0504671	0.0307276	0.0131378	0.0273403	-	0.0306086	0.0223208	0.0252574	0.0216223	0.00858798	0.0159198	0.0143355	0.0199354	0.0225783	0.0143284	0.00816401	0.00940514	0.00731446	0.0172978	0.0202119	0.0276695	0.0244406	0.0121258	0.0119281	0.00332875	0.00316022	0.00142008	0.000315474	0.000157712
	Ala2_GGC	-	1	0.0874136	0.021051	0.0155997	0.00669549	0.0178122	0.0171739	0.016241	0.0435432	0.0197575	0.0079416	0.00927414	0.010174	0.0159791	0.00981627	0.00334696	0.0155557	-	0.0579879	0.0228916	0.0244374	-	-	0.0167277	0.0170745	0.0164954	0.00844617	0.00631461	0.0137173	0.00436933	0.00642092	0.0135146	0.0146308	0.00734944	0.009294	0.0114234	0.0240242	0.0185198	0.026349	0.00734625	0.00972973	0.0088622	0.00386916	0.00741607	0.00351904	0.00210697	0.000329106
	Ala1B_TGC	-	1	0.0841207	0.0226015	0.0178374	0.00642414	0.0159012	0.0166698	0.0131887	0.0351266	0.0160806	0.00626186	0.00637011	0.00765777	0.0125891	0.00911385	0.00267338	0.0134191	-	0.0502346	0.0194467	0.018672	-	-	0.0156369	0.0158897	0.0146689	0.00754091	0.00567068	0.0108892	0.00361298	0.0033073	0.00688239	0.0105408	0.00242087	0.00721024	0.00609294	0.0270503	0.0172561	0.0201424	0.00761208	0.0125692	0.00827816	0.00152109	0.00115622	0.00112629	0.0018768	0.000142883
	Asp_GTC	-	1	0.120859	0.0187069	0.0123514	0.00911561	0.0199821	0.0119007	0.00920873	0.0209884	0.0560796	0.0145098	0.00894899	0.0131493	0.0152985	0.00670657	0.00171614	0.0143672	-	0.0282079	0.00940798	0.00132501	0.0294983	-	0.306513	0.144581	0.0269033	0.0062368	0.00870866	0.0122464	0.0069015	0.00483473	0.00849348	0.00922266	0.00329355	0.00468004	0.00923189	0.00855241	0.00672597	0.0155212	0.0124583	0.0119732	0.0125738	0.00569339	0.00778551	0.00405429	0.00117752	0.00018186
	Glu_TTC	-	1	0.0605895	0.0176318	0.0165191	0.0157028	0.017129	0.0283121	0.0244396	0.0365299	0.0554362	0.0202537	0.0249865	0.0283092	0.0289186	0.038017	0.023061	-	-	0.0283751	0.0210993	0.00996452	0.0106875	0.0133794	0.0209151	0.0194047	0.0227035	0.00754388	0.00937698	0.0104698	0.00134076	0.00266359	0.0016257	0.000398192	0.000827984	0.00164251	0.00395637	0.0130128	0.00993689	0.0291743	0.0225765	0.004324	0.00616151	0.00144019	0.00135019	0.00157274	0.000175804	0.000126953
	Leu1(P)_CAG	-	1	0.561598	0.0548125	0.0213039	0.0166583	0.0248585	0.0230825	0.0186409	0.0357224	0.0169984	0.00798758	0.0193647	0.00990952	0.00556984	0.00511509	0.0140786	0.0735838	-	0.433565	0.0746863	0.0178375	0.0828968	-	0.0316811	0.00960691	0.010897	0.0120575	0.0042024	0.0173605	0.00486414	0.0104564	0.0143956	0.0145091	0.00305368	0.00828817	0.00962904	0.0123168	0.0121669	0.0159885	0.00279583	0.0115767	0.0313969	0.0123607	0.00617766	0.0125508	0.00751566	0.00532983
	Leu1_CAG	-	1	0.55232	0.0565695	0.0242712	0.0223654	0.0319659	0.0284915	0.0220513	0.0369314	0.0215314	0.0127226	0.0215768	0.00766895	0.00404962	0.00530288	0.0116912	0.0722768	-	0.437387	0.0658952	0.0188038	0.0848501	-	0.0348154	0.0111598	0.0122296	0.0140267	0.00554695	0.0175706	0.00534067	0.00976794	0.0141431	0.0131319	0.00254692	0.00745077	0.00922752	0.0121293	0.0116025	0.0162259	0.00324546	0.0116544	0.0330829	0.0117495	0.00570577	0.0114648	0.00740938	0.00606001
	Leu2_GAG	-	1	0.30529	0.0382229	0.0296243	0.0216777	0.0314925	0.0279503	0.0191471	0.0454829	0.0253036	0.0206186	0.0230486	0.00959141	0.0026784	0.00646265	0.0110902	0.0787879	-	0.395668	0.0640548	0.0188353	0.095838	-	0.0369844	0.014838	0.011006	0.0118424	0.00727767	0.0263957	0.00472722	0.0105812	0.0114455	0.00834336	0.00805249	0.0078414	0.0200797	0.0187082	0.00537711	0.0196296	0.00380044	0.0160457	0.0515863	0.0171124	0.00686096	0.0152482	0.00640512	0.00794281
	Leu3_TAG	-	1	0.398288	0.0415058	0.0221803	0.0226015	0.017671	0.0341357	0.0305473	0.0941583	0.0586107	0.0121515	0.0220203	0.00556135	0.00656077	0.014966	0.0110999	0.0897122	-	0.474328	0.0787367	0.0265589	0.0890204	-	0.0442378	0.014735	0.0212096	0.0255108	0.0101707	0.0145161	0.00867976	0.014075	0.0185656	0.0208829	0.00269775	0.0137292	0.019616	0.0322125	0.0316808	0.0773187	0.024038	0.020019	0.0600211	0.0261453	0.0161641	0.0165087	0.00976311	0.00877719
	Arg2_ACG	-	1	0.249858	0.0319912	0.0145847	0.0164825	0.0267927	0.0381151	0.0147095	0.0413581	0.052333	0.0123138	0.01582	0.0145176	0.0223046	0.0163686	0.00397315	0.0165061	-	0.0525946	0.0188502	0.00424046	0.0185446	-	0.0627008	0.0304244	0.0191489	0.0122326	0.00918362	0.0115058	0.011942	0.00668221	0.00944122	0.0111624	0.00550005	0.00271739	0.012326	0.0173862	0.0103432	0.0193848	0.0115713	0.0054049	0.00311208	0.00618566	0.00669448	0.00233303	0.000502949	0.000457018
	Arg3_CCG	-	1	0.432756	0.06125	0.0111248	0.0241255	0.0200946	0.0526316	0.0335498	0.0878578	0.0637708	0.0287253	0.0262238	0.0345992	0.051241	0.0287714	0.00464396	0.0278405	-	0.0903491	0.0246996	0.00531209	0.0163292	-	0.076041	0.023571	0.0122235	0.00578704	0.0136986	0.0234114	0.00883978	0.0237325	0.0328639	0.00518941	0.0128074	0.0176145	0.0226267	0.0282027	0.0780079	0.0876558	0.0300312	0.0952717	0.105994	0.11502	0.0145805	0.0252078	0.0153156	0.00915751
	Pro1_CGG	-	1	0.904254	0.0386801	0.00984837	0.0208174	0.00653893	0.0130572	0.0160957	0.0377948	0.0164897	0.00845227	0.0124521	0.00354513	0.00891892	0.00963597	0.00293568	0.00596896	0.0132199	0.0202616	0.00624442	0.00507164	-	-	0.0255745	0.0279813	0.0186211	0.00644028	0.00245298	0.00465062	0.0038221	0.00621547	0.004811	0.0104285	0.00574777	0.0056035	0.00701091	0.0241095	0.0565574	0.0504913	0.00733945	0.0337781	0.0959933	0.506021	0.0669129	0.00622078	0.00446205	0.00142122
	Pro2_GGG	-	1	0.929187	0.0249592	0.00993072	0.00847264	0.013776	0.0210038	0.00876616	0.0312102	0.0348361	0.00953927	0.0153877	0.00556439	0.00827749	0.00995122	0.0046611	0.0063682	0.012388	0.024177	0.00921319	0.0067716	-	-	0.0294849	0.0251082	0.0176901	0.0106025	0.00335458	0.006002	0.00381996	0.00561519	0.00997384	0.00471928	0.00292066	0.0205022	0.0164139	0.0191659	0.00941677	0.00453583	0.000755401	0.0164933	0.0270348	0.0152335	0.0125123	0.014547	0.00413907	0.00179039
	Pro3_TGG	-	1	0.903108	0.0326286	0.0114762	0.0282897	0.0127477	0.0218771	0.0117621	0.035857	0.0302681	0.0136364	0.0138549	0.00456343	0.00694864	0.00977264	0.00456621	0.0124498	0.0240145	0.0268156	0.00867639	0.00714809	-	-	0.0295269	0.0237041	0.0164816	0.0113137	0.00395257	0.00982596	0.00637101	0.00247606	0.00818599	0.0117304	0.01112	0.00342821	0.00665241	0.0274205	0.0494912	0.042213	0.00806844	0.0341932	0.047235	0.337714	0.0175738	0.0122578	0.00751174	0.00284958
	Gln2_CTG	-	1	0.27189	0.041858	0.0373113	0.0259435	0.0176315	0.0238593	0.0136443	0.0415632	0.0413974	0.00694813	0.0139404	0.0164257	0.0108318	0.0116662	0.00264647	-	-	0.0338565	0.00298875	0.0109976	-	-	0.0434511	0.026434	0.0369201	0.0135374	0.00695081	0.00908265	0.00316885	0.0103786	0.0155825	0.0153078	0.00173404	0.010863	0.0121779	0.0199267	0.0308131	0.028375	0.0199234	0.010989	0.0074283	0.00483469	0.00573732	0.00191909	0.000865935	0.00043278
	His_GTG	1	0.138544	0.0192552	0.0246279	0.024542	0.00720659	0.0179459	0.0184419	0.017789	0.0509559	0.0223093	0.0105153	0.00688787	0.00982693	0.0201207	0.0107343	0.00565491	0.0417908	-	0.245349	0.0645501	0.024215	-	-	0.0421006	0.0346866	0.0195423	0.0114572	0.00428845	0.00874948	0.00851134	0.0197353	0.0226979	0.0171836	0.00821551	0.0137926	0.0424365	0.0158042	0.0168989	0.0255843	0.0172195	0.0118937	0.00711826	0.00395347	0.00645999	0.00801829	0.00754235	0.00111732
	Gln1_TTG	-	1	0.279738	0.0374595	0.033494	0.0215726	0.0145786	0.0251953	0.0118608	0.0419682	0.0379022	0.00671003	0.0120939	0.0153953	0.0123511	0.0109024	0.00252452	-	-	0.0351321	0.00289584	0.0115876	-	-	0.0408696	0.022253	0.0346471	0.0121382	0.0079053	0.00796424	0.00303828	0.00943018	0.0167686	0.00876061	0.00276911	0.00804704	0.0174478	0.0267481	0.0473337	0.0397983	0.0241091	0.0118787	0.00908679	0.00543531	0.00457805	0.00185339	0.000383313	6.39e-05
	fMet1_CAT	-	1	0.778906	0.0327475	0.0291372	0.0292802	0.0273213	0.023434	0.0318664	0.0515699	0.0372964	0.0269705	0.0233635	0.016313	0.0204695	0.0167887	0.00744519	0.0117177	0.0215555	0.0233904	0.0110459	0.00876467	-	-	0.0317389	0.0281019	0.0109235	0.00837758	0.0156183	0.0259357	0.00965575	0.0180292	0.0133301	0.00814773	0.00116424	0.00797147	0.00375643	0.00894374	0.0136189	0.0147222	0.0202157	0.00359582	0.00229647	0.00234387	0.00511544	0.01095	0.00375703	0.000517229
	fMet2_CAT	-	1	0.798398	0.0494924	0.0354957	0.0285375	0.0243619	0.0259887	0.0348964	0.052686	0.031031	0.0215475	0.0248329	0.0141243	0.012093	0.0164684	0.00636364	0.00722022	0.0220653	0.0257954	0.00936968	0.00760778	-	-	0.0287356	0.0240385	0.0103093	0.00630418	0.0147516	0.0197869	0.00680272	0.0170877	0.0182349	0.00867679	0	0.00789096	0.00286123	0.00921332	0.0125962	0.0165175	0.0215488	0.00535834	0.00333778	0.000667111	0.00990753	0.00656168	0.00131062	0.000654879
	Ile2_CAT	-	1	0.113636	0	0	0.0222222	0	0	0	0.0625	0.0204082	0	0.02	0	0.0196078	0.0192308	0.0188679	-	-	0.0185185	0.0181818	0.0178571	0.0819672	-	0.322222	0.158879	0.0446429	0	0.00884956	0.0258621	0.00854701	0.00847458	0.00840336	0	0	0	0	0.0325203	0.211538	0.589474	0.657966	0.014197	0.00177148	0.00440917	0.00438982	0.00349956	0	0.00608696
	Met_CAT	-	1	0.386082	0.013986	0.00909485	0.00730868	0.0097914	0.0155071	0.00250836	0.0132013	0.0284569	0.00518341	0.00515668	0.00669819	0.0128355	0.00464576	0.00193199	0.00728807	-	0.0585049	0.00788248	0.00570004	0.032736	-	0.16872	0.0628188	0.00957192	0.00791348	0.00472565	0.00366205	0.00520427	0.00979129	0.00333847	0.0086558	0.00556962	0.00528834	0.00426279	0.00672478	0.00717112	0.0090664	0.0130592	0.00886865	0.0123106	0.00728555	0.00327946	0.00790146	0.0117134	0.0077484
	Ile1_GAT	-	1	0.669675	0.018285	0.00248128	0.00597144	0.0130258	0.0108985	0.00617129	0.00836768	0.00870749	0.00308553	0.00368898	0.00598924	0.0093639	0.00768984	0.00549669	0.00170981	-	0.00632186	0.00424913	0.00415312	0.0266199	-	0.216699	0.0801297	0.0132057	0.00582304	0.0070136	0.00809856	0.00375632	0.00274356	0.00121203	0.0014996	0.00162849	0.00248906	0.00433047	0.00940641	0.00298869	0.0160473	0.0168976	0.0112614	0.0070712	0.00682851	0.00360775	0.00321	0.00387075	0.000336474
	Arg5_CCT	-	1	0.118834	0.0251366	0.0358272	0.0186143	0.0252016	0.03125	0.0321361	0.0416667	0.0792327	0.0188216	0.0309278	0.0490196	0.0264317	0.0101744	0.0143266	-	-	0.0392292	0.0108918	0.0040678	0.00806994	-	0.070625	0.040192	0.0380842	0.00801374	0.0190904	0.021966	0.0151433	0.00698174	0.00267809	0.00160428	0.00106838	0.00425532	0.00476443	0.0161458	0.039039	0.0628518	0.0494873	0.0311015	0.0194833	0.00673117	0.00251783	0	0.000838574	0.000419111
	Ser3_GCT	-	1	0.401686	0.0453714	0.0548158	0.040166	0.0559386	0.0521313	0.0451	0.0873673	0.044285	0.0135448	0.0367889	0.041136	0.0312261	0.040842	0.0311485	-	-	0.0435711	0.0188518	0.00275351	0.0228243	0.103999	0.0421245	0.0292958	0.0391414	0.0263234	0.0254422	0.0370546	0.0128626	0.0132214	0.0109193	0.00241341	0.00686662	0.0118423	0.0202571	0.0425149	0.0356709	0.146451	0.0670909	0.0592956	0.0400566	0.0259177	0.019409	0.0149271	0.0177032	0.0134032
	Arg4_TCT	-	1	0.22839	0.0483019	0.0119314	0.0240175	0.029661	0.051574	0.0550633	0.109357	0.0779626	0.0263158	0.0227498	0.034384	0.0345781	0.0569565	0.00733707	0.0301381	-	0.223847	0.0396256	0.00620155	0.0306583	-	0.097885	0.0445596	0.0325815	0.0172414	0.0114439	0.0256228	0.00893487	0.00908667	0.020315	0.00250455	0.00588502	0.0153778	0.00708121	0.00985977	0.0560496	0.0279453	0.021444	0.0238141	0.0130781	0.00208057	0.00264101	0.00225861	0.000940203	0.000563804
	Thr2_CGT	-	1	0.176532	0.0320545	0.0436881	0.0109811	0.0221755	0.0276895	0.0211064	0.0569872	0.0294835	0.0132424	0.0089481	0.0170055	0.0208612	0.00797418	0.00566358	0.0436902	-	0.310555	0.0777178	0.0304953	-	-	0.0480983	0.0390919	0.0267512	0.017426	0.0121177	0.0216409	0.0127264	0.0087477	0.0138031	0.00667509	0.00831917	0.011233	0.00980907	0.0270132	0.051027	0.02067	0.0343377	0.018613	0.0131101	0.00939174	0.00750073	0.0144262	0.00393194	0.00135647
	Thr1_GGT	-	1	0.305697	0.0362342	0.0373191	0.0136719	0.0182891	0.0248813	0.019323	0.0488328	0.0167524	0.00863084	0.00739875	0.00849421	0.020794	0.00824897	0.00410754	0.0384201	-	0.242177	0.0646475	0.0260288	-	-	0.0418811	0.0341057	0.0207428	0.0101549	0.0125887	0.0133593	0.0078097	0.00612405	0.0028403	0.00515682	0.0067359	0.0108273	0.0174577	0.0350727	0.00288695	0.0104532	0.00989972	0.0861238	0.033829	0.0138811	0.00915091	0.00584441	0.00395409	0.00082309
	Thr3_GGT	-	1	0.284597	0.0339268	0.0277596	0.0105025	0.0187094	0.0192816	0.015613	0.0317178	0.0163289	0.00623008	0.0054755	0.00743707	0.0152113	0.00768693	0.00278746	0.0326277	-	0.247921	0.0634378	0.0231911	-	-	0.0345692	0.0263341	0.0180666	0.00941476	0.0114037	0.0117667	0.0076474	0.00482815	0.00236754	0.00268686	0.00759535	0.00785634	0.0167113	0.0329318	0.00334296	0.011936	0.00914906	0.0832595	0.0281643	0.0113994	0.00805823	0.00369052	0.0020031	0.000322977
	Thr4_TGT	-	1	0.164752	0.0448606	0.0497975	0.0177395	0.018688	0.0255083	0.0345035	0.0577589	0.0492502	0.014827	0.0138358	0.0204323	0.0328683	0.0159281	0.014446	0.0470793	-	0.048008	0.0255821	0.0173171	-	-	0.043031	0.0332043	0.0208783	0.0138629	0.00778585	0.0153689	0.00775166	0.00662085	0.0103273	0.0149091	0.000736145	0.00616639	0.0157391	0.0105852	0.0279015	0.0147522	0.0171186	0.0322371	0.00827612	0.00687976	0.012624	0.0112046	0.00570331	0.00412007
	Asn_GTT	-	1	0.681985	0.109499	0.0179281	0.0161843	0.0323226	0.0295768	0.0161757	0.0382054	0.0356263	0.0131938	0.0162049	0.0218443	0.0299615	0.0125642	0.00348764	0.0333729	-	0.0556561	0.0137565	0.0111461	-	-	0.0315819	0.029618	0.022308	0.00628123	0.00947398	0.0206924	0.0109955	0.0103205	0.0150663	0.0115556	0.00569801	0.00484966	0.0083788	0.00681534	0.0101646	0.0194173	0.0305607	0.0140768	0.00648482	0.00431579	0.00609909	0.00982198	0.00155714	0.00125738
	Lys_TTT	-	1	0.168424	0.0211673	0.00857715	0.0174958	0.0297182	0.0101886	0.0189827	0.0336877	0.0252449	0.00846915	0.00724935	0.0102814	0.0176924	0.00789331	0.00369865	0.0336931	-	0.221276	0.0563757	0.0232367	-	-	0.033809	0.0267454	0.0180978	0.0102647	0.00720806	0.0129801	0.0158904	0.00812017	0.0133176	0.0218305	0.00182463	0.00658375	0.0114107	0.00650719	0.0106288	0.0161146	0.0291057	0.0208673	0.0079462	0.00673583	0.00549267	0.0036607	0.000960473	0.000756723
Figure5-figure_supplement_1C	Ψ	CMC+	CMC-	woTreatment		D	CMC+	CMC-	woTreatment		m7G	CMC+	CMC-	woTreatment
	Leu1(P)_CAG	0.054315	0.012361	0.018617		Ser5_GGA	0.120942	0.095841	0.005627		Phe_GAA	0.113662	0.133721	0.073056
	Leu1_CAG	0.049072	0.011749	0.017329		Ser1_TGA	0.465011	0.40568	0.009876		Trp_CCA	0.102781	0.07338	0.003777
	Leu2_GAG	0.036126	0.017112	0.014695		Leu5_CAA	0.021277	0.044706	0.005367		Val2A_GAC	0.063562	0.074016	0.02996
	Leu3_TAG	0.137475	0.026145	0.027706		Leu4_TAA	0.047619	0.04034	0.00692		Val2B_GAC	0.068476	0.067915	0.042419
	Gln2_CTG	0.047086	0.004835	0.00086		Ser2_CGA	0.029851	0.019022	0.001912		Val1_TAC	0.047317	0.02693	0.001666
	His_GTG	0.074477	0.003953	0.001075		Ser5_GGA	0.040904	0.032044	0.00366		Gly3_GCC	0.065729	0.042464	0.003382
	Gln1_TTG	0.048909	0.005435	0.002209		Ser1_TGA	0.067368	0.068757	0.006886		Ala2_GGC	0.025097	0.013351	0.002431
	Leu5_CAA	0.08875	0.027272	0.020094		Val2A_GAC	0.496042	0.446125	0.007464		Ala1B_TGC	0.034965	0.018119	0.001403
	Phe_GAA	0.021963	0.02081	0.020048		Val2B_GAC	0.510638	0.398733	0.006659		Asp_GTC	0.039217	0.026389	0.002423
	Leu4_TAA	0.028741	0.017376	0.016422		Asp_GTC	0.383637	0.306513	0.00538		Arg2_ACG	0.164397	0.140148	0.040027
	Cys_GCA	0.066175	0.014221	0.013194		Leu1(P)_CAG	0.031188	0.031681	0.003477		Arg3_CCG	0.121788	0.072865	0.009227
	Tyr1_GTA	0.073643	0.019761	0.011677		Leu2_GAG	0.051495	0.036984	0.004174		Pro1_CGG	0.052641	0.035853	0.003175
	Tyr2_GTA	0.062037	0.021329	0.012094		Ile2_CAT	0.5	0.322222	0.008818		Pro2_GGG	0.067939	0.055115	0.006016
	Leu3_TAG	0.104423	0.016164	0.001505		Met_CAT	0.302198	0.16872	0.006128		Pro3_TGG	0.092906	0.06831	0.005804
	Gln2_CTG	0.11398	0.005737	0.000541		Ile1_GAT	0.35428	0.216699	0.003928		His_GTG	0.122842	0.089667	0.015851
	His_GTG	0.131772	0.00646	0.000689		Ser3_GCT	0.052741	0.042125	0.005517		fMet1_CAT	0.023381	0.020468	0.001486
	Ile2_CAT	0.052632	0.00439	0.003585		Trp_CCA	0.104822	0.074002	0.003134		Ile2_CAT	0.271523	0.256834	0.027185
	Met_CAT	0.010601	0.003279	0.000422		Val2A_GAC	0.13913	0.102214	0.004141		Met_CAT	0.380392	0.334186	0.039391
	Thr2_CGT	0.017849	0.007501	0.0003		Val2B_GAC	0.181319	0.075265	0.001907		Ile1_GAT	0.065934	0.078257	0.019924
	Thr4_TGT	0.047441	0.012624	0.001314		Val1_TAC	0.032374	0.025114	0.001024		Thr2_CGT	0.036616	0.02713	0.002387
	Asn_GTT	0.067103	0.006099	0.000989		Gly3_GCC	0.091114	0.066489	0.001275		Thr1_GGT	0.082333	0.056563	0.00473
	Lys_TTT	0.054128	0.005493	0.001882		Ala2_GGC	0.033759	0.022892	0.000623		Thr3_GGT	0.030202	0.022288	0.001225
	Ser5_GGA	0.013965	0.00799	0.001521		Ala1B_TGC	0.030105	0.019447	0.000783		Thr4_TGT	0.078689	0.048398	0.002675
	Leu1(P)_CAG	0.035798	0.012551	0.001115		Leu1(P)_CAG	0.085537	0.074686	0.001743		Asn_GTT	0.071866	0.042622	0.002369
	Leu1_CAG	0.045449	0.011465	0.001727		Leu2_GAG	0.076	0.064055	0.003126		Lys_TTT	0.067615	0.071562	0.023008
	Pro2_GGG	0.113014	0.014547	0.001075		Arg2_ACG	0.02394	0.01885	0.002368
	Arg4_TCT	0.06142	0.002259	0.001089		Arg3_CCG	0.051948	0.0247	0.001656
	Leu5_CAA	0.032496	0.000423	0.000343		His_GTG	0.08658	0.06455	0.001548
	Phe_GAA	0.064998	0.002591	0.002237		Met_CAT	0.060345	0.007882	0.002677
	Leu4_TAA	0.038122	0.001048	0.000449		Ile1_GAT	0.010526	0.004249	0.00151
	Trp_CCA	0.065959	0.002014	0.000812		Thr2_CGT	0.100408	0.077718	0.001616
	Cys_GCA	0.056897	0.001197	0.000825		Thr1_GGT	0.087788	0.064647	0.000911
	Ser2_CGA	0.073864	0.002194	0.001657		Thr3_GGT	0.082001	0.063438	0.001225
	Ser5_GGA	0.045953	0.001163	0.001422		Lys_TTT	0.087888	0.056376	0.002294
	Ser1_TGA	0.066567	0.001286	0.000902		Leu5_CAA	0.258065	0.226721	0.030994
	Tyr1_GTA	0.05771	0.00135	0.001256		Phe_GAA	0.126582	0.133333	0.011019
	Tyr2_GTA	0.044457	0.001159	0.001087		Leu4_TAA	0.086207	0.145238	0.031746
	Val2A_GAC	0.046618	0.001509	0.001036		Trp_CCA	0.245902	0.198732	0.018864
	Val2B_GAC	0.05665	0.001974	0.001343		Val2A_GAC	0.26936	0.176285	0.021939
	Val1_TAC	0.038938	0.000925	0.000592		Val2B_GAC	0.191275	0.133381	0.013372
	Gly1_CCC	0.057322	0.001105	0.00148		Gly3_GCC	0.319991	0.257375	0.009746
	Gly3_GCC	0.052761	0.001097	0.000808		Asp_GTC	0.047855	0.028208	0.00774
	Gly2_TCC	0.067401	0.001257	0.001131		Leu1(P)_CAG	0.515306	0.433565	0.03289
	Ala2_GGC	0.033697	0.000878	0.000585		Leu2_GAG	0.475469	0.395668	0.044059
	Ala1B_TGC	0.03814	0.000745	0.000506		His_GTG	0.299763	0.245349	0.01738
	Asp_GTC	0.04102	0.000957	0.000427		Met_CAT	0.165138	0.058505	0.013731
	Glu_TTC	0.042578	0.000963	0.001608		Thr2_CGT	0.323956	0.310555	0.014337
	Leu1(P)_CAG	0.119439	0.002533	0.001564		Thr1_GGT	0.328192	0.242177	0.009319
	Leu1_CAG	0.040007	0.000675	0.000445		Thr3_GGT	0.300562	0.247921	0.015792
	Leu2_GAG	0.029615	0.000889	0.00059		Asn_GTT	0.0711	0.055656	0.004082
	Leu3_TAG	0.063799	0.001675	0.000427		Lys_TTT	0.276923	0.221276	0.021495
	Arg2_ACG	0.051192	0.003237	0.002146		Cys_GCA	0.164927	0.12891	0.005907
	Arg3_CCG	0.105745	0.003947	0.003647		Phe_GAA	0.065217	0.052632	0.00273
	Pro1_CGG	0.043592	0.00164	0.001143		Trp_CCA	0.054054	0.040393	0.001782
	Pro2_GGG	0.052111	0.000893	0.000866		Cys_GCA	0.13	0.114444	0.003862
	Pro3_TGG	0.070507	0.002422	0.001269		Val2A_GAC	0.195329	0.131185	0.001827
	Gln2_CTG	0.046158	0.001107	0.00082		Val2B_GAC	0.164032	0.134148	0.001984
	His_GTG	0.057375	0.001071	0.00071		Gly1_CCC	0.065628	0.05279	0.001382
	Gln1_TTG	0.059346	0.001112	0.000574		Gly3_GCC	0.055387	0.033992	0.001004
	fMet1_CAT	0.022749	0.000525	0.000445		Asp_GTC	0.189683	0.144581	0.002237
	fMet2_CAT	0.210117	0.013891	0.0385		Arg2_ACG	0.046472	0.030424	0.001055
	Ile2_CAT	0.052353	0.00409	0.00112		Pro1_CGG	0.02784	0.027981	0.001242
	Met_CAT	0.077816	0.00577	0.002794		Gln2_CTG	0.037248	0.026434	0.001351
	Ile1_GAT	0.032198	0.001478	0.000998		His_GTG	0.052615	0.034687	0.001173
	Arg5_CCT	0.06087	0.000834	0.000946		Gln1_TTG	0.033272	0.022253	0.001216
	Ser3_GCT	0.048054	0.001232	0.001468		fMet1_CAT	0.035254	0.028102	0.000741
	Arg4_TCT	0.059948	0.001307	0.001618		fMet2_CAT	0.032028	0.024038	0
	Thr2_CGT	0.044528	0.001014	0.00052		Ile2_CAT	0.125	0.158879	0.003515
	Thr1_GGT	0.055696	0.000998	0.000419		Met_CAT	0.120773	0.062819	0.001865
	Thr3_GGT	0.048118	0.00074	0.000685		Ile1_GAT	0.121408	0.08013	0.001191
	Thr4_TGT	0.039904	0.000702	0.000836		Thr2_CGT	0.057343	0.039092	0.001457
	Asn_GTT	0.047177	0.000966	0.00031		Thr1_GGT	0.041185	0.034106	0.001345
	Lys_TTT	0.064647	0.001852	0.001128		Thr3_GGT	0.037037	0.026334	0.00071
	Asp_GTC	0.004847	5.51e-05	1.47e-05		Asn_GTT	0.034178	0.029618	0.001124
	Ile1_GAT	0.007141	0.000373	5.65e-05		Lys_TTT	0.037914	0.026745	0.001743
	Glu_TTC	0.079261	0.038017	0.001903
	Leu5_CAA	0.117021	0.017241	0.00431
	Phe_GAA	0.039683	0.032702	0.001799
	Leu4_TAA	0.05	0.014011	0.008157
	Cys_GCA	0.086705	0.019139	0.000878
[truncated: 50 more columns]
