# Supplementary material for: A tRNA modification in Mycobacterium tuberculosis facilitates optimal intracellular growth
Source: eLife. 2023 Sep 27;12:RP87146. doi: 10.7554/eLife.87146 (PMC10531406; doi:10.7554/eLife.87146)
Supplement: Figure 5—figure supplement 2—source data 1. [file elife-87146-fig5-figsupp2-data1.xlsx]

## Sheet: Figure5-figure_supplement_2
Figure5-figure_supplement_2A		IAA-	IAA+	CMC-/Alkali	CMC+/Alkali
	Val2A_GAC	0.000413	0.00118	0.014091	0.027933
	Val2B_GAC	0.000389	0.00093	0.013329	0.021709
	Ala2_GGC	0.000269	0.001362	0.003869	0.006312
	Leu1(P)_CAG	0.018617	0.025071	0.012361	0.054315
	Leu1_CAG	0.017329	0.023765	0.011749	0.049072
	Leu2_GAG	0.014695	0.023445	0.017112	0.036126
	Leu3_TAG	0.027706	0.034519	0.026145	0.137475
	Pro2_GGG	0.032429	0.040574	0.015233	0.031904
	Gln2_CTG	0.00086	0.002167	0.004835	0.047086
	His_GTG	0.001075	0.003497	0.003953	0.074477
	Gln1_TTG	0.002209	0.003737	0.005435	0.048909
Figure5-figure_supplement_2B		IAA-	IAA+	CMC-/Alkali	CMC+/Alkali
	Leu5_CAA	0.020094	0.017686	0.027272	0.08875
	Phe_GAA	0.020048	0.020904	0.02081	0.021963
	Leu4_TAA	0.016422	0.01916	0.017376	0.028741
	Cys_GCA	0.013194	0.013782	0.014221	0.066175
	Tyr1_GTA	0.011677	0.010582	0.019761	0.073643
	Tyr2_GTA	0.012094	0.012157	0.021329	0.062037
	Leu3_TAG	0.001505	0.002888	0.016164	0.104423
	Gln2_CTG	0.000541	0.00065	0.005737	0.11398
	His_GTG	0.000689	0.000583	0.00646	0.131772
	Ile2_CAT	0.003585	0.003547	0.00439	0.052632
	Met_CAT	0.000422	0.001287	0.003279	0.010601
	Thr2_CGT	0.0003	0.001155	0.007501	0.017849
	Thr4_TGT	0.001314	0.001599	0.012624	0.047441
	Asn_GTT	0.000989	0.001443	0.006099	0.067103
	Lys_TTT	0.001882	0.002541	0.005493	0.054128
Figure5-figure_supplement_2C		IAA-	IAA+	CMC-/Alkali	CMC+/Alkali
	Leu5_CAA	0.000343	0.000325	0.000423	0.032496
	Phe_GAA	0.002237	0.00264	0.002591	0.064998
	Leu4_TAA	0.000449	0.000912	0.001048	0.038122
	Trp_CCA	0.000812	0.001272	0.002014	0.065959
	Cys_GCA	0.000825	0.000739	0.001197	0.056897
	Ser2_CGA	0.001657	0.002613	0.002194	0.073864
	Ser5_GGA	0.001422	0.001828	0.001163	0.045953
	Ser1_TGA	0.000902	0.001116	0.001286	0.066567
	Tyr1_GTA	0.001256	0.001119	0.00135	0.05771
	Tyr2_GTA	0.001087	0.000858	0.001159	0.044457
	Val2A_GAC	0.001036	0.001231	0.001509	0.046618
	Val2B_GAC	0.001343	0.000951	0.001974	0.05665
	Val1_TAC	0.000592	0.000972	0.000925	0.038938
	Gly1_CCC	0.00148	0.001311	0.001105	0.057322
	Gly3_GCC	0.000808	0.000985	0.001097	0.052761
	Gly2_TCC	0.001131	0.001358	0.001257	0.067401
	Ala2_GGC	0.000585	0.00087	0.000878	0.033697
	Ala1B_TGC	0.000506	0.001094	0.000745	0.03814
	Asp_GTC	0.000427	0.000557	0.000957	0.04102
	Glu_TTC	0.001608	0.001697	0.000963	0.042578
	Leu1(P)_CAG	0.001564	0.001521	0.002533	0.119439
	Leu1_CAG	0.000445	0.000432	0.000675	0.040007
	Leu2_GAG	0.00059	0.000945	0.000889	0.029615
	Leu3_TAG	0.000427	0.001237	0.001675	0.063799
	Arg2_ACG	0.002146	0.005548	0.003237	0.051192
	Arg3_CCG	0.003647	0.002433	0.003947	0.105745
	Pro1_CGG	0.001143	0.000944	0.00164	0.043592
	Pro2_GGG	0.000866	0.001631	0.000893	0.052111
	Pro3_TGG	0.001269	0.001509	0.002422	0.070507
	Gln2_CTG	0.00082	0.001238	0.001107	0.046158
	His_GTG	0.00071	0.001023	0.001071	0.057375
	Gln1_TTG	0.000574	0.000961	0.001112	0.059346
	fMet1_CAT	0.000445	0.000647	0.000525	0.022749
	fMet2_CAT	0.0385	0.026677	0.013891	0.210117
	Ile2_CAT	0.00112	0.003389	0.00409	0.052353
	Met_CAT	0.002794	0.003148	0.00577	0.077816
	Ile1_GAT	0.000998	0.001014	0.001478	0.032198
	Arg5_CCT	0.000946	0	0.000834	0.06087
	Ser3_GCT	0.001468	0.002824	0.001232	0.048054
	Arg4_TCT	0.001618	0.001346	0.001307	0.059948
	Thr2_CGT	0.00052	0.000747	0.001014	0.044528
	Thr1_GGT	0.000419	0.000798	0.000998	0.055696
	Thr3_GGT	0.000685	0.000759	0.00074	0.048118
	Thr4_TGT	0.000836	0.001111	0.000702	0.039904
	Asn_GTT	0.00031	0.000573	0.000966	0.047177
	Lys_TTT	0.001128	0.001506	0.001852	0.064647
