# Supplementary material for: A tRNA modification in Mycobacterium tuberculosis facilitates optimal intracellular growth
Source: eLife. 2023 Sep 27;12:RP87146. doi: 10.7554/eLife.87146 (PMC10531406; doi:10.7554/eLife.87146)
Supplement: Figure 5—figure supplement 3—source data 1. [file elife-87146-fig5-figsupp3-data1.xlsx]

## Sheet: Figure5-figure_supplement_3
Figure5-figure_supplement_3A		IAA-	IAA+	CMC-/Alkali	CMC+/Alkali
	Trp_CCA	0.018864	0.021117	0.198732	0.245902
	Val2A_GAC	0.021939	0.029696	0.176285	0.26936
	Val2B_GAC	0.013372	0.019889	0.133381	0.191275
	Gly3_GCC	0.009746	0.016666	0.257375	0.319991
	Leu1(P)_CAG	0.03289	0.044147	0.433565	0.515306
	Leu1_CAG	0.035935	0.043271	0.437387	0.504381
	Leu2_GAG	0.044059	0.055872	0.395668	0.475469
	Leu3_TAG	0.038614	0.058931	0.474328	0.553598
	His_GTG	0.01738	0.015915	0.245349	0.299763
	Met_CAT	0.013731	0.016236	0.058505	0.165138
	Arg4_TCT	0.016039	0.014286	0.223847	0.25779
	Thr2_CGT	0.014337	0.017577	0.310555	0.323956
	Thr1_GGT	0.009319	0.017404	0.242177	0.328192
	Thr3_GGT	0.015792	0.01232	0.247921	0.300562
	Lys_TTT	0.021495	0.030855	0.221276	0.276923
Figure5-figure_supplement_3B		IAA-	IAA+	CMC-/Alkali	CMC+/Alkali
	Leu5_CAA	0.00094697	0.00437318	0.166316	0.151899
	Phe_GAA	0.000932836	0	0.133929	0.047619
	Leu4_TAA	0.00185529	0	0.0763359	0.116279
	Trp_CCA	0.000233263	0	0.00860479	0.00738007
	Ser5_GGA	7.95925e-05	0.00205165	0.00147511	0.00717131
	Val2A_GAC	0.00132861	0.000567752	0.0155743	0.0189573
	Val2B_GAC	0.00092374	0.00102354	0.00968421	0.0252101
	Gly1_CCC	0	0.0031093	0.00281577	0.00526316
	Gly3_GCC	0.00144728	0.00168529	0.036796	0.0483456
	Gly2_TCC	0.000500469	0.00432023	0.0034535	0.00442478
	Asp_GTC	0.00167191	0.00212005	0.163221	0.20705
	Leu1(P)_CAG	0.000293049	0.000450369	0.0124002	0.0154739
	Leu1_CAG	0.000712964	0.000374887	0.0139204	0.0154664
	Leu2_GAG	0.000254001	0	0.0110902	0.0168453
	Leu3_TAG	0.000845881	0.000453789	0.019555	0.025641
	His_GTG	0.000741997	0.000843935	0.0365103	0.0383463
	Ile2_CAT	0	0	0	0
	Met_CAT	0.000628818	0.000300729	0.00154679	0
	Arg5_CCT	0.000507872	0.00270514	0.00143266	0.00714286
	Arg4_TCT	0.00159591	0.00298507	0.00302637	0
	Thr2_CGT	0.00134239	0.00117546	0.0342026	0.0431034
	Thr1_GGT	0.000754846	0.000904824	0.0331382	0.0486381
	Thr3_GGT	0.00117671	0.00113225	0.0318169	0.0451128
	Thr4_TGT	0.00177766	0.00190173	0.196886	0.207145
	Asn_GTT	0.00181192	0.00211715	0.20008	0.208383
	Lys_TTT	0.00133897	0.0012022	0.0325458	0.0358674
Figure5-figure_supplement_3C		IAA-	IAA+	CMC-/Alkali	CMC+/Alkali
	Trp_CCA	0.000229253	0	0.00423057	0.00625
	Val2A_GAC	0.000294334	0.000941442	0.00256246	0.00925926
	Val2B_GAC	0.000511614	0.000436681	0.0074565	0.00833333
	Val1_TAC	0.00155473	0.00176252	0.177067	0.185121
	Gly3_GCC	0.000658814	0.000725262	0.00718458	0.0100905
	Ala2_GGC	0.00215276	0.0027667	0.184929	0.209037
	Ala1B_TGC	0.00180682	0.00217271	0.198431	0.217201
	Leu1(P)_CAG	0.00040833	0.000805441	0.00428516	0.00176367
	Leu1_CAG	0.000409288	0.0004117	0.00275946	0.00865052
	Leu2_GAG	0.000420805	0.000236574	0.0043305	0.00550206
	Leu3_TAG	0.000336899	0.000149544	0.00429711	0.00662252
	Arg2_ACG	0.000694474	0.000430531	0.0752311	0.0846154
	Arg3_CCG	0.00233333	0.00145879	0.162142	0.144279
	Pro3_TGG	0.000424891	0.000785714	0.00117797	0
	His_GTG	0.00048418	0.000249012	0.00651024	0.010158
	Met_CAT	0.000805333	0.00022477	0.00998464	0
	Ile1_GAT	0.00161676	0.00214421	0.0435614	0.0887446
	Arg4_TCT	0.00219987	0.0029036	0.125681	0.118321
	Thr2_CGT	0.00031412	0.00117021	0.0110327	0.0161507
	Thr1_GGT	0.000546709	0.000563698	0.00623053	0.0110396
	Thr3_GGT	0.000685899	0.000676247	0.00580219	0.00724638
	Lys_TTT	0.00077629	0.000557315	0.00663932	0.00933532
Figure5-figure_supplement_3D		IAA-	IAA+	CMC-/Alkali	CMC+/Alkali
	Val2A_GAC	0.007464	0.016863	0.446125	0.496042
	Val2B_GAC	0.006659	0.013808	0.398733	0.510638
	Asp_GTC	0.00538	0.013025	0.306513	0.383637
	Ile2_CAT	0.008818	0.052174	0.322222	0.5
	Met_CAT	0.006128	0.011711	0.16872	0.302198
	Ile1_GAT	0.003928	0.009966	0.216699	0.35428
Figure5-figure_supplement_3E		IAA-	IAA+	CMC-/Alkali	CMC+/Alkali
	Cys_GCA	0.003862	0.004119	0.114444	0.13
Figure5-figure_supplement_3F		IAA-	IAA+	CMC-/Alkali	CMC+/Alkali
	Ser1_TGA	0.009876	0.028665	0.40568	0.465011
Figure5-figure_supplement_3G		IAA-	IAA+	CMC-/Alkali	CMC+/Alkali
	Leu5_CAA	0.00181324	0	0.142857	0.179688
	Phe_GAA	0.000914077	0.00168919	0.185273	0.280488
	Leu4_TAA	0.00350263	0.0046729	0.178654	0.344828
	Trp_CCA	0.000896057	0.00177242	0.139177	0.1417
	Cys_GCA	0.0018056	0.000838926	0.116084	0.141975
	Ser1_TGA	0.000215008	0.00152149	0.0244989	0.0504587
	Val2A_GAC	0.000857756	0.00145112	0.0602689	0.0747126
	Val2B_GAC	0.00130653	0.00127551	0.0491697	0.0781671
	Gly1_CCC	0.00153965	0.00355703	0.225224	0.234906
	Gly3_GCC	0.00233846	0.00239946	0.14632	0.175857
	Asp_GTC	0.000790862	0.000912281	0.0508866	0.0687271
	Leu1(P)_CAG	0.00133846	0.0015107	0.0817799	0.0908397
	Leu1_CAG	0.00152383	0.00204491	0.0799296	0.0938281
	Leu2_GAG	0.00103734	0.00164799	0.0847751	0.0932811
	Leu3_TAG	0.00136283	0.000415743	0.0868246	0.0859788
	Pro1_CGG	0.00143275	0.000555062	0.12132	0.0931174
	Pro2_GGG	0.00154687	0.00116086	0.159832	0.1402
	Pro3_TGG	0.00160385	0.000633937	0.141036	0.114935
	Gln2_CTG	0.000806894	0.00094821	0.0722672	0.0770762
	His_GTG	0.00175366	0.00209911	0.13441	0.164043
	Gln1_TTG	0.000915555	0.000123434	0.0740741	0.0882002
	fMet1_CAT	0.00175316	0.00204622	0.21163	0.228752
	fMet2_CAT	0	0	0.215736	0.137255
	Ile2_CAT	0.00179211	0	0.0363636	0.142857
	Met_CAT	0.000658646	0.000438661	0.0146168	0.0504202
	Ile1_GAT	0.00107816	0.00113543	0.0386335	0.0803339
	Thr2_CGT	0.00223214	0.0023753	0.140757	0.174083
	Thr1_GGT	0.00182168	0.00148531	0.143625	0.179023
	Thr3_GGT	0.00181991	0.00265193	0.149262	0.172883
	Thr4_TGT	0.0017545	0.00176902	0.204857	0.212574
	Asn_GTT	0.00203291	0.00193831	0.204528	0.221859
	Lys_TTT	0.00181402	0.00167204	0.143373	0.183425
Figure5-figure_supplement_3H		IAA-	IAA+	CMC-/Alkali	CMC+/Alkali
	Ser2_CGA	0.00194175	0	0.088685	0.0483871
	Ser5_GGA	0.00125974	0.00199437	0.167967	0.176087
	Ser1_TGA	0.000212495	0.000748223	0.0280438	0.0126582
	Val2A_GAC	0.000995308	0.000178923	0.0367993	0.0446194
	Val2B_GAC	0.00040044	0.000981767	0.0352304	0.0386473
	Gly2_TCC	0.000808458	0.00517771	0.00208628	0.00258287
	Asp_GTC	0.000515159	0.000557058	0.0261358	0.0324591
	Arg2_ACG	0.000601222	0.000300048	0.113629	0.15073
	Arg3_CCG	0.00199269	0.00071736	0.192408	0.17284
	Ile2_CAT	0	0	0.0166667	0.285714
	Met_CAT	0.000656685	0.000723118	0.0130989	0.023622
	Ile1_GAT	0.000868522	0.00096372	0.029633	0.055666
	Arg5_CCT	0	0	0.235532	0.220736
	Ser3_GCT	0.00146931	0.00274905	0.203231	0.2249
	Arg4_TCT	0.00121102	0.00224215	0.243836	0.225131
Figure5-figure_supplement_3I		IAA-	IAA+	CMC-/Alkali	CMC+/Alkali
	Cys_GCA	0.00060042	0.000831255	0.00894454	0.0144092
