# Supplementary material for: A tRNA modification in Mycobacterium tuberculosis facilitates optimal intracellular growth
Source: eLife. 2023 Sep 27;12:RP87146. doi: 10.7554/eLife.87146 (PMC10531406; doi:10.7554/eLife.87146)
Supplement: Figure 6—figure supplement 1—source data 1. [file elife-87146-fig6-figsupp1-data1.xlsx]

## Sheet: Figure6-figure_supplement_1
Figure6-figure_supplement_1A		WT IAA-	mnmA IAA-	WT IAA+	mnmA IAA+	WT CMC-/alkali	truB CMC-/alkali	WT CMC+/alkali	truB CMC+/alkali
	Leu4_TAA	0.052632	0.090909	0.166667	0.133333	0.228571	0.272727	0.272727	0.214286
	Gly3_GCC	0.025699	0.043304	0.065969	0.040196	0.094417	0.106278	0.099919	0.099584
	Ala3_CGC	0.017511	0.029572	0.06078	0.035493	0.08888	0.084356	0.098667	0.08572
	Ala1_TGC	0.011235	0.030206	0.040827	0.025103	0.067341	0.072004	0.075882	0.080193
	Asp_GTC	0.019039	0.046897	0.074694	0.050626	0.081423	0.078332	0.077127	0.086006
	Leu3_TAG	0.01524	0.023059	0.039024	0.01567	0.311189	0.245421	0.352239	0.310345
	Pro1_CGG	0.003629	0.004118	0.012174	0.015976	0.023347	0.028758	0.02439	0.02765
	Pro2_GGG	0.001893	0.00188	0.007314	0.01048	0.012405	0.012686	0.013965	0.017128
	Pro3_TGG	0.004628	0.003037	0.008677	0.010216	0.01682	0.022096	0.023729	0.029575
	Gln2_CTG	0.007212	0.008094	0.014112	0.011138	0.07418	0.081922	0.075808	0.076662
	His_GTG	0.017492	0.03998	0.055367	0.030834	0.085003	0.09137	0.090392	0.094461
	fMetB_CAT	0.054054	0.208333	0.197674	0.046729	0.140449	0.127854	0.117188	0.222222
	Lys2_CTT	0.051507	0.113225	0.132963	0.074265	0.193274	0.210587	0.220701	0.184682
	Asn_GTT	0.014191	0.027203	0.02525	0.022466	0.100667	0.113358	0.117743	0.107677
	Lys1_TTT	0.03	0.080487	0.091335	0.04878	0.148523	0.176925	0.174181	0.211845
Figure6-figure_supplement_1B		WT IAA-	mnmA IAA-	WT IAA+	mnmA IAA+	WT CMC-/alkali	truB CMC-/alkali	WT CMC+/alkali	truB CMC+/alkali
	Phe_GAA	0	0	0.014706	0.014085	0	0	0	0
	Leu4_TAA	0	0	0	0	0	0	0	0
	Cys_GCA	0.001435	0	0	0.005376	0.003263	0	0	0
	Val3_CAC	0.000323	0.00047	0.006295	0.007968	0.001123	0.000932	0.002256	0.002257
	Gly1_CCC	0.000452	0.000618	0.005738	0.006216	0.001323	0.000619	0.001185	0.001848
	Gly3_GCC	0.000268	0.000459	0.001552	0.002483	0.000387	0.000372	0.000198	0.000131
	Gly2_TCC	0	0.000986	0.003263	0.004388	0	0.00097	0.000623	0.000541
	Ala3_CGC	0.0006	0.000191	0.001501	0.00193	0.000277	0.000271	0.000402	0.00024
	Ala1_TGC	0.000501	0.00067	0.001066	0.002444	0.000558	0.000709	0.000265	0
	Asp_GTC	0.000379	0.000791	0.000584	0.000928	0.000773	0.000366	0	0.000705
	Leu1_CAG	0.000844	0.000727	0.000932	0.001497	0.015004	0.014854	0.011467	0.017982
	Leu2_GAG	0.000689	0.000981	0.000697	0.000489	0.011142	0.0128	0.010438	0.012658
	Leu3_TAG	0	0	0.002571	0	0	0	0	0
	Pro2_GGG	0.000178	0.000126	0.002702	0.003087	0.000666	0.000131	0.000447	0.000449
	Gln2_CTG	4.7e-05	0.000193	0.000899	0.000477	0.000245	0.000382	0	0
	His_GTG	0.000571	0.000626	0.0013	0.002278	0.000399	0.001016	0.000199	0.001148
	Gln1_TTG	0	0	0	0.003216	0.000204	0.000388	0	0.000845
	fMetA_CAT	0.000411	0.000199	0.00317	0.006078	0	0.000623	0.001367	0
	fMetB_CAT	0	0	0	0	0	0	0	0
	Thr2_CGT	0.000603	0.000275	0.006035	0.007914	0.000232	0.000356	0.002638	0.001837
	Thr1_GGT	0.000407	0.000695	0.003656	0.004501	0.000782	0.000947	0.001978	0.000611
	Thr4_TGT	0.001171	0	0.00726	0.006185	0.000358	0	0.001222	0.001112
	Lys2_CTT	0.000482	0.000595	0.001348	0.001795	0.000792	0	0.000477	0
	Asn_GTT	5.95e-05	0.000338	0.001975	0.001381	0.000491	0.000296	0.000209	0
	Lys1_TTT	0.00051	0.000667	0	0.003174	0.000644	0.000265	0.001194	0
Figure6-figure_supplement_1C		WT IAA-	WT IAA+	mnmA IAA-	mnmA IAA+	WT CMC-/alkali	WT CMC+/alkali	truB CMC-/alkali	truB CMC+/alkali
	Leu5_CAA	0	0	0	0	0.012618	0	0.011013	0.041096
	Leu4_TAA	0	0	0	0	0	0.0625	0.0625	0
	Trp_CCA	0.001501	0.004556	0.001416	0	0.026612	0.024077	0.025501	0.045752
	Gly3_GCC	0.002872	0.001639	0.003169	0.002016	0.031639	0.034326	0.030484	0.029306
	Ala3_CGC	0.0022	0.001476	0.002184	0.001788	0.027352	0.02352	0.024945	0.024935
	Ala2_GGC	0.003589	0.002816	0.004082	0.00336	0.043833	0.041213	0.045195	0.041544
	Ala1_TGC	0.002692	0.001052	0.001988	0.001819	0.031807	0.028773	0.027887	0.029427
	Asp_GTC	0.001195	0.00115	0.001122	0.001534	0.012762	0.014587	0.011623	0.012113
	Leu3_TAG	0.002382	0.002538	0.003147	0.001449	0.030457	0.018433	0.021036	0.041667
	Pro1_CGG	0.000222	0	0	0.001177	0	0.000317	0.000185	0.000602
	Pro2_GGG	5.95e-05	0.00269	0	0.002249	0.000133	0.000223	0.00013	0.000449
	Pro3_TGG	0.000848	0	0	0.001157	0	0	0	0
	Gln2_CTG	0.001407	0.001119	0.000576	0.001543	0.018058	0.018317	0.022392	0.021459
	His_GTG	0.002749	0.001271	0.002157	0.001657	0.027237	0.027164	0.025741	0.023693
	fMetB_CAT	0	0	0	0	0.026144	0.017857	0.010471	0
	fMetC_CAT	0.000437	0.004877	0.000466	0.005359	0.00096	0.000939	0.000911	0.001032
	Arg4_TCT	0.004005	0.004575	0.002796	0.003215	0.045903	0.050923	0.043222	0.046589
	Lys2_CTT	0.001558	0.001538	0.001829	0.002786	0.019785	0.026252	0.021684	0.016707
	Asn_GTT	0.002074	0.000978	0.003918	0.001916	0.02894	0.032908	0.032774	0.03174
	Lys1_TTT	0.002199	0.002577	0.001521	0.001409	0.026275	0.031627	0.024087	0.025048
Figure6-figure_supplement_1D		WT IAA-	mnmA IAA-	WT IAA+	mnmA IAA+	WT CMC-/alkali	truB CMC-/alkali	WT CMC+/alkali	truB CMC+/alkali
	Asp_GTC	0.035832	0.051092	0.077418	0.088126	0.168788	0.159361	0.160766	0.16025
	fMetA_CAT	0.023579	0.033927	0.056534	0.059082	0.150309	0.13693	0.164714	0.150605
	fMetB_CAT	0.028846	0.061069	0.053191	0.051724	0.092683	0.118321	0.098039	0.190476
	Ile1_GAT	0.036406	0.046807	0.071478	0.07579	0.175397	0.171856	0.181963	0.18123
Figure6-figure_supplement_1E		WT IAA-	WT IAA+	mnmA IAA-	mnmA IAA+	WT CMC-/alkali	WT CMC+/alkali	truB CMC-/alkali	truB CMC+/alkali
	Phe_GAA	0.008368	0.010638	0	0	0.003356	0	0.009091	0
	Cys_GCA	0.001406	0	0	0	0.025237	0.031008	0.038745	0.018072
	Val1_TAC	0.002762	0.003083	0.002957	0.00453	0.052595	0.05801	0.049435	0.061361
	Gly3_GCC	0.003608	0.002093	0.003625	0.003806	0.049942	0.046068	0.049605	0.042734
	Gly2_TCC	0	0.00318	0.003554	0.004261	0.019732	0.017502	0.064209	0.060434
	Ala3_CGC	0.003228	0.003517	0.002205	0.003513	0.053315	0.049843	0.053238	0.051951
	Ala2_GGC	0.004149	0.00317	0.003586	0.003844	0.055606	0.051561	0.055511	0.05573
	Ala1_TGC	0.00629	0.004493	0.003406	0.005826	0.057148	0.056626	0.053453	0.060463
	Asp_GTC	0.000614	0.001574	0.000744	0.000861	0.019325	0.017219	0.017272	0.01863
	Pro1_CGG	0.000879	0.000577	0.000725	0.000757	0.02112	0.023537	0.020761	0.019674
	Pro2_GGG	0.002298	0.001635	0.002121	0.003356	0.028666	0.025058	0.027339	0.032962
	Pro3_TGG	0.000421	0	0.000758	0	0.017424	0.017778	0.018519	0.02011
	His_GTG	0.004526	0.003531	0.00478	0.006078	0.057386	0.055124	0.057796	0.052928
	fMetA_CAT	0.001213	0.0005	0.000579	0.001356	0.023555	0.023124	0.021636	0.021102
	fMetB_CAT	0	0	0	0	0	0.007463	0.008811	0
	fMetC_CAT	0.003037	0.003357	0.003298	0.004218	0.061039	0.060921	0.062288	0.058637
	Ile1_GAT	0.000514	0.000502	0.000622	0.001508	0.006699	0.006346	0.007076	0.009304
	Thr2_CGT	0.002931	0.002257	0.003741	0.003052	0.061176	0.055439	0.064898	0.05079
	Thr4_TGT	0.004223	0.002618	0.00486	0.003663	0.059264	0.051418	0.057571	0.05445
	Lys2_CTT	0.003419	0.005635	0.004694	0.005288	0.047084	0.046656	0.049204	0.046467
	Lys1_TTT	0.003578	0.006961	0.004157	0.00288	0.050843	0.052418	0.050487	0.042083
Figure6-figure_supplement_1F		WT IAA-	WT IAA+	mnmA IAA-	mnmA IAA+	WT CMC-/alkali	WT CMC+/alkali	truB CMC-/alkali	truB CMC+/alkali
	Asp_GTC	0.000611	0.001291	0.001373	0.001687	0.010544	0.008908	0.008418	0.008043
	Arg2_ACG	0	0	0.000625	0.000791	0.016457	0.01292	0.015416	0.013001
	Arg3_CCG	0.001209	0.002714	0.002436	0.000677	0.03164	0.026155	0.030625	0.029756
	fMetA_CAT	0.001208	0.002456	0.001344	0.001114	0.011707	0.013611	0.008933	0.007412
	fMetB_CAT	0.006645	0.011364	0.00813	0	0.032258	0.014599	0.04329	0.039216
	Ile1_GAT	0.001432	0.001477	0.001358	0.001151	0.012747	0.01233	0.007029	0.007906
	Arg5_CCT	0.002132	0.002105	0.002326	0.005525	0.050719	0.032917	0.046667	0.05036
	Arg4_TCT	0.004689	0.00175	0.005074	0.004413	0.056683	0.051356	0.05103	0.036254
