# Supplementary material for: A tRNA modification in Mycobacterium tuberculosis facilitates optimal intracellular growth
Source: eLife. 2023 Sep 27;12:RP87146. doi: 10.7554/eLife.87146 (PMC10531406; doi:10.7554/eLife.87146)
Supplement: Figure 6—figure supplement 2—source data 1. [file elife-87146-fig6-figsupp2-data1.xlsx]

## Sheet: Figure6-figure_supplement_2
Figure6-figure_supplement_2		WT IAA-	WT IAA+	mnmA IAA-	mnmA IAA+	WT CMC-/alkali	WT CMC+/alkali	truB CMC-/alkali	truB CMC+/alkali
	Phe_GAA	0.005294	0.006533	0.004752	0.007979	0.026429	0.030687	0.021528	0.028385
	Trp_CCA	0.004982	0.005608	0.002196	0.009086	0.01217	0.013853	0.011005	0.01471
	Val3_CAC	0.005045	0.006231	0.002486	0.005459	0.011756	0.013136	0.012218	0.013025
	Val2_GAC	0.003273	0.006588	0.002895	0.006349	0.014497	0.015293	0.018504	0.017866
	Val1_TAC	0.005722	0.008613	0.002252	0.004915	0.023888	0.023488	0.025401	0.031274
	Gly3_GCC	0.004364	0.007086	0.003982	0.00729	0.016641	0.01903	0.0162	0.018662
	Ala3_CGC	0.005685	0.008129	0.003916	0.006559	0.025497	0.023719	0.024989	0.028133
	Ala2_GGC	0.004078	0.005941	0.003738	0.005993	0.013665	0.015633	0.013656	0.013725
	Ala1_TGC	0.004477	0.00445	0.003886	0.005808	0.015967	0.01847	0.019547	0.023356
	Glu2_CTC	0.003201	0.002627	0.000488	0.001603	0.004239	0.002488	0.002019	0.001477
	Asp_GTC	0.004356	0.00755	0.002541	0.005093	0.017293	0.016987	0.0162	0.017509
	Leu2_GAG	0.004531	0.005424	0.002009	0.004067	0.003005	0.003735	0.001918	0.004477
	Arg2_ACG	0.005441	0.010091	0.00482	0.008262	0.027659	0.030535	0.025264	0.031832
	Arg3_CCG	0.000474	0.007123	0.00046	0.004959	0.001529	0.001629	0.000396	0.000656
	Pro1_CGG	0.001537	0.004176	0.000645	0.006835	0.000739	0.001147	0.000865	0.000444
	Pro2_GGG	0.003448	0.003031	0.002145	0.003079	0.011152	0.013074	0.011423	0.01215
	Pro3_TGG	0.000515	0.001011	0.000454	0.005464	0.000963	0.001708	0.001041	0
	His_GTG	0.004565	0.007131	0.004878	0.005727	0.019911	0.019976	0.021211	0.021972
	Gln1_TTG	0.000412	0.001517	0.000429	0.001699	0.000944	0.000904	0.000746	0
	fMetA_CAT	0.003949	0.007431	0.004439	0.00431	0.01403	0.016794	0.015947	0.017254
	fMetB_CAT	0.006923	0.004892	0.005549	0.007576	0.024655	0.028506	0.019021	0.027286
	fMetC_CAT	0.004218	0.004672	0.00348	0.005454	0.015588	0.018528	0.015784	0.016949
	Ile1_GAT	0.003725	0.005165	0.003931	0.006182	0.012128	0.015674	0.013296	0.015514
	Arg5_CCT	0.007955	0.008197	0.005112	0.003161	0.018686	0.022894	0.017783	0.0375
	Arg4_TCT	0.006142	0.008505	0.005938	0.007246	0.012079	0.018253	0.01629	0.017007
	Thr2_CGT	0.006097	0.006831	0.001859	0.005196	0.021899	0.026506	0.024623	0.026098
	Thr1_GGT	0.003323	0.009531	0.003812	0.007085	0.011899	0.014968	0.013252	0.014137
	Thr4_TGT	0.004773	0.004082	0.00203	0.005156	0.011611	0.01214	0.011105	0.008772
	Lys2_CTT	0.004641	0.005664	0.002593	0.00545	0.017813	0.021948	0.014098	0.021729
	Asn_GTT	0.005508	0.009101	0.005059	0.009466	0.025924	0.028169	0.026808	0.035215
	Lys1_TTT	0.004929	0.005167	0.002322	0.005615	0.021194	0.021343	0.019037	0.023136
