# Supplementary material for: A tRNA modification in Mycobacterium tuberculosis facilitates optimal intracellular growth
Source: eLife. 2023 Sep 27;12:RP87146. doi: 10.7554/eLife.87146 (PMC10531406; doi:10.7554/eLife.87146)
Supplement: Figure 6—figure supplement 3—source data 1. [file elife-87146-fig6-figsupp3-data1.xlsx]

## Sheet: Figure6-figure_supplemet_3
Figure6-figure_supplement_3A		WT IAA-	mnmA IAA-	WT IAA+	mnmA IAA+	WT CMC-/alkali	truB CMC-/alkali	WT CMC+/alkali	truB CMC+/alkali
	Leu5_CAA	0.001984	0.002296	0.011055	0.014237	0.002092	0.001801	0.033728	0.012231
	Phe_GAA	0.005196	0.006457	0.024284	0.023922	0.004652	0.00415	0.059088	0.013969
	Leu4_TAA	0.00541	0.006372	0.013689	0.009607	0.005401	0.003159	0.044159	0.015862
	Trp_CCA	0.021019	0.026316	0.027681	0.034146	0.017879	0.006668	0.084364	0.017641
	Cys_GCA	0.012097	0.019063	0.025355	0.023743	0.007339	0.006244	0.153978	0.024449
	Ser2_CGA	0.010638	0.011527	0.021632	0.019355	0.029838	0.012448	0.178404	0.02649
	Ser1_TGA	0.015152	0.015637	0.025926	0.020936	0.020936	0.010428	0.180744	0.036344
	Tyr_GTA	0.001153	0.000978	0.002236	0.002325	0.001845	0.001325	0.043653	0.008411
	Val3_CAC	0.003937	0.00259	0.007174	0.010358	0.003917	0.003181	0.071148	0.008645
	Val2_GAC	0.006395	0.006824	0.01062	0.012543	0.007496	0.00497	0.124708	0.013956
	Val1_TAC	0.00593	0.008247	0.010133	0.013704	0.00708	0.003491	0.12356	0.009566
	Gly1_CCC	0.004609	0.005056	0.016989	0.018374	0.006617	0.007978	0.123285	0.019113
	Gly3_GCC	0.00328	0.003617	0.021444	0.024016	0.004778	0.003869	0.087211	0.013941
	Gly2_TCC	0.00732	0.005772	0.027194	0.0208	0.009015	0.00366	0.118844	0.016495
	Ala3_CGC	0.003136	0.002922	0.010373	0.014732	0.003812	0.003358	0.053656	0.00872
	Ala2_GGC	0.00392	0.004595	0.009142	0.010359	0.005576	0.003037	0.090576	0.009349
	Ala1_TGC	0.004271	0.005341	0.009335	0.010204	0.004839	0.003732	0.079831	0.007536
	Glu2_CTC	0.00265	0.003949	0.004945	0.006802	0.004253	0.00443	0.088783	0.008593
	Asp_GTC	0.025418	0.026225	0.035361	0.027895	0.016244	0.004157	0.109534	0.008275
	Glu1_TTC	0.003201	0.002352	0.002038	0.005206	0.005164	0.003207	0.086804	0.006276
	Leu1_CAG	0.038828	0.035806	0.048063	0.047336	0.046493	0.008963	0.200229	0.019082
	Leu2_GAG	0.061466	0.067959	0.071671	0.065983	0.054455	0.011097	0.203681	0.029231
	Leu3_TAG	0.005887	0.002882	0.016429	0.016015	0.0131	0.004801	0.169324	0.032755
	Arg2_ACG	0.006413	0.005879	0.022392	0.024644	0.009251	0.007135	0.090968	0.018434
	Arg3_CCG	0.004688	0.00353	0.018405	0.020128	0.003971	0.005475	0.088157	0.010715
	Pro1_CGG	0.004738	0.00382	0.010273	0.014692	0.007147	0.00417	0.092709	0.012797
	Pro2_GGG	0.004341	0.002859	0.018762	0.023858	0.006423	0.005818	0.116073	0.020204
	Pro3_TGG	0.005658	0.008155	0.030594	0.036713	0.015291	0.009098	0.161464	0.028422
	Gln2_CTG	0.003337	0.003166	0.014516	0.016303	0.005399	0.003862	0.081266	0.025679
	His_GTG	0.00876	0.01046	0.012939	0.013368	0.007328	0.003957	0.103977	0.022776
	Gln1_TTG	0.001596	0.001655	0.031693	0.017687	0.004375	0.002948	0.089214	0.024898
	fMetA_CAT	0.005577	0.009591	0.014482	0.018342	0.00642	0.002816	0.073884	0.008388
	fMetB_CAT	0.001941	0.002979	0.007501	0.008959	0.00305	0.001384	0.04105	0.007083
	fMetC_CAT	0.003546	0.003888	0.016596	0.018975	0.006037	0.003863	0.09317	0.013783
	Ile1_GAT	0.001647	0.001874	0.009694	0.014042	0.003024	0.002214	0.061519	0.007785
	Arg5_CCT	0.013648	0.019197	0.052934	0.08223	0.018536	0.017535	0.277401	0.06082
	Ser3_GCT	0.014408	0.008006	0.02741	0.029889	0.097074	0.035256	0.274203	0.068027
	Arg4_TCT	0.003177	0.003045	0.009817	0.018063	0.006128	0.003796	0.071429	0.015785
	Thr2_CGT	0.008153	0.008954	0.02706	0.027702	0.011003	0.010433	0.101654	0.025411
	Thr1_GGT	0.002323	0.002295	0.018077	0.020803	0.005299	0.002817	0.07626	0.018276
	Thr4_TGT	0.010573	0.015213	0.015644	0.01865	0.011194	0.005648	0.092998	0.016776
	Lys2_CTT	0.00491	0.004114	0.024927	0.033322	0.006339	0.007248	0.067881	0.016637
	Asn_GTT	0.006641	0.005559	0.011374	0.010973	0.008579	0.004905	0.093654	0.019709
	Lys1_TTT	0.003245	0.00322	0.010882	0.015669	0.007372	0.002929	0.083645	0.011765
Figure6-figure_supplement_3B		WT IAA-	mnmA IAA-	WT IAA+	mnmA IAA+	WT CMC-/alkali	truB CMC-/alkali	WT CMC+/alkali	truB CMC+/alkali
	Ala3_CGC	0.001404	0.001057	0.003291	0.004329	0.001941	0.001371	0.007825	0.004413
	Leu1_CAG	0.023817	0.026396	0.060517	0.057963	0.048051	0.042588	0.133572	0.090354
	Leu2_GAG	0.050653	0.056002	0.106509	0.108456	0.092847	0.083219	0.225101	0.198798
	Leu3_TAG	0.014848	0.015028	0.034014	0.03411	0.05348	0.041729	0.178168	0.105769
	Gln2_CTG	0.019036	0.021114	0.048658	0.051539	0.027381	0.031258	0.168981	0.109544
	His_GTG	0.001595	0.001596	0.003109	0.002749	0.002769	0.003307	0.095542	0.060032
	Gln1_TTG	0.031704	0.026819	0.091896	0.060119	0.044473	0.042088	0.190941	0.142626
Figure6-figure_supplement_3C		WT IAA-	mnmA IAA-	WT IAA+	mnmA IAA+	WT CMC-/alkali	truB CMC-/alkali	WT CMC+/alkali	truB CMC+/alkali
	Leu4_TAA	0.025311	0.016784	0.024506	0.032156	0.013448	0.018451	0.068306	0.056006
	Tyr_GTA	0.028658	0.027481	0.033282	0.032011	0.018048	0.018888	0.066617	0.06265
	Ala2_GGC	0.000416	0.000141	0.004501	0.006469	0.000743	0.000416	0.0092	0.007254
	Arg2_ACG	0.028617	0.030868	0.031139	0.032664	0.016985	0.014325	0.106658	0.078475
	Pro2_GGG	0.002674	0.002025	0.014396	0.017939	0.001845	0.002969	0.033589	0.021111
	Gln2_CTG	0.00847	0.007164	0.008686	0.009075	0.006766	0.004592	0.100661	0.071809
	Gln1_TTG	0.004404	0.003723	0.02445	0.010766	0.007571	0.0057	0.11855	0.090553
	fMetA_CAT	0.003338	0.004351	0.006209	0.006203	0.004903	0.003216	0.109313	0.075707
	fMetB_CAT	0.002809	0.002284	0.002988	0.003418	0.001946	0.001598	0.046659	0.026188
	Ser3_GCT	0.000776	0.00306	0	0.001026	0.002757	0.005995	0.020531	0.034483
	Arg4_TCT	0.001207	0.002172	0.005095	0.002144	0.001168	0.002603	0.055359	0.047181
	Thr2_CGT	0.000662	0.000499	0.000486	0.00166	0.00076	0.000295	0.011136	0.008463
	Lys2_CTT	0.013339	0.0142	0.020362	0.018445	0.01794	0.00414	0.089988	0.056838
	Lys1_TTT	0.002053	0.00147	0.00211	0.002965	0.004597	0.004425	0.105975	0.064492
