# Supplementary material for: A tRNA modification in Mycobacterium tuberculosis facilitates optimal intracellular growth
Source: eLife. 2023 Sep 27;12:RP87146. doi: 10.7554/eLife.87146 (PMC10531406; doi:10.7554/eLife.87146)
Supplement: Figure 7—source data 1. [file elife-87146-fig7-data1.xlsx]

## Sheet: Fig. 7
Fig. 7B	Time (days)	WT			ΔmnmA			WT + ATRA			ΔMnmA + ATRA
	0	1	1	1	1	1	1	1	1	1	1	1	1
	3	4.59451	4.64643	6.13333	2.53892	2.36054	2.11834	1.5947	1.2921	2.03571	1.23841	0.986842	0.946078
	5	12.314	12.5393	14.2333	5.17365	4.84354	4.23669	2.52652	2.2921	2.58929	1.4106	1.03289	1.15686
	7	49.1768	52.1357	53.0333	13.7126	9.89796	10.0178	6.22727	6.38144	6.22321	1.66225	1.98026	2.7402
